# Supplementary material for: The synthesis and evaluation of new benzophenone derivatives as tubulin polymerization inhibitors
Source: Royal Society of Chemistry journal article supplement (doi:10.1039/c6ra16948a), 2016-01-01

## Supporting Information

### The synthesis and evaluation of new benzophenone derivatives as tubulin polymerization inhibitors

Shun Zhang, Baijiao An, Jun Yan, Ling Huang, Xingshu Li\*

<sup>a</sup>School of Pharmaceutical Sciences, Sun Yat-sen University, Guangzhou, 510006,  
China

SI1. Biological assay (S2 – S3)

SI2. NMR spectrums of target compounds (S4 – S15)

SI3. NMR spectrums of intermediate compounds (S16 – S28)

SI4. HPLC chromatograms of target compounds (S28 – S32)

SI5. HR-MS of target compounds and some of intermediate compounds  
(S32 – S43)

SI6. IR of some of intermediate compounds (S44 – S47)

## SI1. Biological assay

**Cell Culture.** The human cancer cell lines (A549, HeLa, A2780, HCT116, MGC803) used in this study were cultivated in DMEM containing 10% (v/v) heat-inactivated fetal bovine serum (FBS), 100 units/mL penicillin, and 100 µg /mL streptomycin, respectively. The cells were incubated at 37 °C under a 5% CO<sub>2</sub> and 90% relative humidity (RH) atmosphere.

**MTT assay.** The cells grown in the logarithmic phase were seeded into a 96-well plates (5×10<sup>3</sup> cells/well) for 24 h, then, they were exposed to different concentrations of the test compounds for 48 h. After attached cells were incubated with 5 mg/mL MTT (Sigma, USA) for another 4 h, the suspension was discarded and subsequently the dark blue crystals (formazan) were solubilized in dimethyl sulfoxide (DMSO). The solution was measured using a multifunction microplate reader (Molecular Devices, Flex Station 3) at the absorbance of 570 nm, and each experiment was performed at least in triplicate. IC<sub>50</sub> values which represent the drug concentrations required to cause 50% cancer cell growth inhibition were used to express the cytotoxic effects of each compound, and were calculated with GraphPad Prism Software version 5.02 (GraphPad Inc., La Jolla, CA, USA).

**Antiproliferative activity of compound 10a against human normal cells.** The cytotoxic effects of the target compound on normal human cells, were examined by MTT (3-(4,5-dimethyl-2-thiazolyl)-2,5-diphenyl-2-H-tetrazolium bromide) assay. Briefly, when the cells reached the logarithmic phase, 5 × 10<sup>3</sup> cells/well were harvested and plated into 96-well plates for 24 h, and then, the cells were exposed to different concentrations of the test compounds for 48 h; each experiment was performed in triplicate. Afterward, 20 µl of 5 mg/ml MTT (Sigma, USA) was added, and the cells were incubated for another 4 h. Then, the suspension was discarded and 150 µl of DMSO was added to each well. After the plates were shocked for 10 min to dissolve the dark blue crystals (formazan), the absorbance at 570 nm was measured using a multifunction microplate reader (Molecular Devices, Flex Station 3). The IC<sub>50</sub> values were calculated with Graph Pad Prism version 5.0.

**In vitro tubulin polymerisation assay.** The tubulin polymerisation assay was performed by an increase in fluorescence intensity, which can be easily recorded due to the incorporation of a fluorescent reporter, DAPI (4',6-diamidino-2-phenylindole), a fluorophore already known as a DNA intercalator. In our experiment, a commercial kit (cytoskeleton, cat. #BK011P) purchased from Cytoskeleton (Danvers, MA, USA), was used for the tubulin polymerisation. The final buffer concentration used for tubulin polymerisation contained 80.0 mM piperazine-N, N'-bis (2-ethanesulfonic acid) sequeisodium salt (pH 6.9), 2.0 mM MgCl<sub>2</sub>, 0.5 mM EGTA, 1 mM GTP, and 10.2% glycerol. First, 5 µL of the tested compounds at the indicated concentrations was added and the mixture was warmed to 37 °C for 1 minute, then, the reaction was initiated by the addition of 55 µL of the tubulin solution. The fluorescence intensity enhancement was recorded every 60sec for 90 min in a multifunction microplate reader (Molecular Devices, Flex Station 3) (emission wavelength is 410 nm, excitation wavelength is 340 nm). The area under the curve was used to determine the concentration that inhibited tubulin polymerisation by 50% (IC<sub>50</sub>), and was calculated with GraphPad Prism Software version 5.02 (GraphPad Inc., La Jolla, CA, USA).

**Immunofluorescence microscopy.** In a 10 mm confocal culture dish, 3X10<sup>4</sup> cells were grown for 24 h, and then incubated in the presence / absence of compound 10a at the indicated concentrations for another 12 h. After washed with phosphate buffer solution (PBS) and fixed in 4% pre-warmed (37 °C) paraformaldehyde for 15 min, the cells were permeabilized with 0.5% Triton X-100 for 15 min and blocked for 30 min in 10% goat serum. Then, the cells were incubated with mouse anti-tubulin antibody (CST, USA) at 4 °C overnight, and were washed with PBS for three times and incubated with goat anti-mouse IgG/Alexa-Fluor 488 antibody (Invitrogen, USA) for 1 h. The samples were immediately visualized on a Zeiss LSM 570 laser scanning confocal microscope (Carl Zeiss, Germany) after the nuclei were stained with Hoechst 33342 (Sigma, USA) in the dark at room temperature for 30 min.

**Cell cycle analysis.** A549 cell were seeded in 6-well plates (3X10<sup>5</sup> cells/well) and incubated in the presence / absence of compound 10a at the indicated concentrations for 24 h and then harvested by centrifugation, fixed in ice-cold 70% ethanol overnight. After the ethanol was removed in the next day, the cells were resuspended in the ice-cold PBS and treated with RNase A (Keygen Biotech, China) at 37 °C for 30 min, followed by incubated with the DNA staining solution propidium iodide (PI, Keygen

Biotech, China) at 4 °C for 30 min. About 10,000 events were detected by flow cytometry (Beckman Coulter, Epics XL) at 488 nm. The data regarding the number of cells in different phases of the cell cycle were analysed by EXPO32 ADC analysis software.

**Apoptosis analysis.** The preparation of A549 cell sample was the same as cell cycle analysis. After incubation, cells were harvested and incubated with 5 µL of Annexin-V/FITC (Keygen Biotech, China) in binding buffer (10 mM HEPES, 140 mM NaCl, and 2.5 mM CaCl<sub>2</sub> at pH 7.4) at room temperature for 15 min. PI solution was then added to the medium for another 10 min-incubation. Almost 10,000 events were collected for each sample and analysed by flow cytometry (Beckman Coulter, Epics XL). The percentage of apoptotic cells was calculated with EXPO32 ADC Analysis software.

**Mitochondrial membrane potential assay.** A lipophilic cationic dye, 5,5',6,6'-tetrachloro-1,1',3,3'-tetraethyl-benzimidazolcarbocyanine (JC-1, Beyotime, China) was used to monitor the level of MMP in the cells. At normal state, the MMP is high and JC-1 appears as aggregates, which indicated by red fluorescence. However, when apoptosis occurs, the MMP reduced and JC-1 displayed as monomers, which indicated by green fluorescence. We applied two methods which including flow cytometry and fluorescence microscopy to detected the MMP. For flow cytometry analysis, A549 cells were plated in 6-well plates (3X10<sup>5</sup> cells/well) and grown for 24 h, and treated with compound **10a** at the indicated concentrations for 48 h. Then the cells were harvested by centrifugation and incubated with JC-1 solution for 30 min. After briefly washing, the proportion of green and red fluorescence intensity were immediately detected and analysed by flow cytometry. For the fluorescence microscopy detection, A549 cells were plated in 6-well plates (3×10<sup>5</sup> cells/well) and grown for 24 h, and treated with compound **10a** at the indicated concentrations for another 48 h. Then the cells were stained with 2 µM JC-1 at 37 °C for 30 min, washed with PBS and then the cell nuclei were stained with Hoechst 33342 (Sigma, USA) for 10 min in the dark. The cell images were immediate detected by a fluorescence microscopy (EVOS FL Auto).

## SI2. NMR spectra of target compounds

### 5a

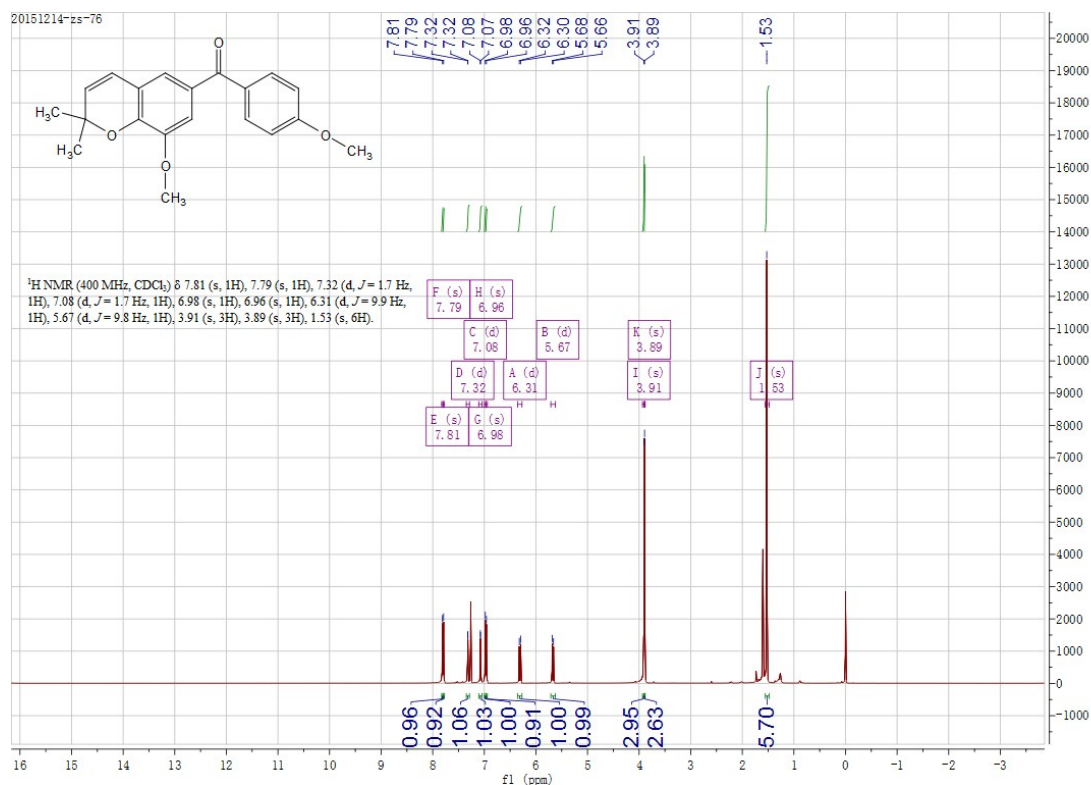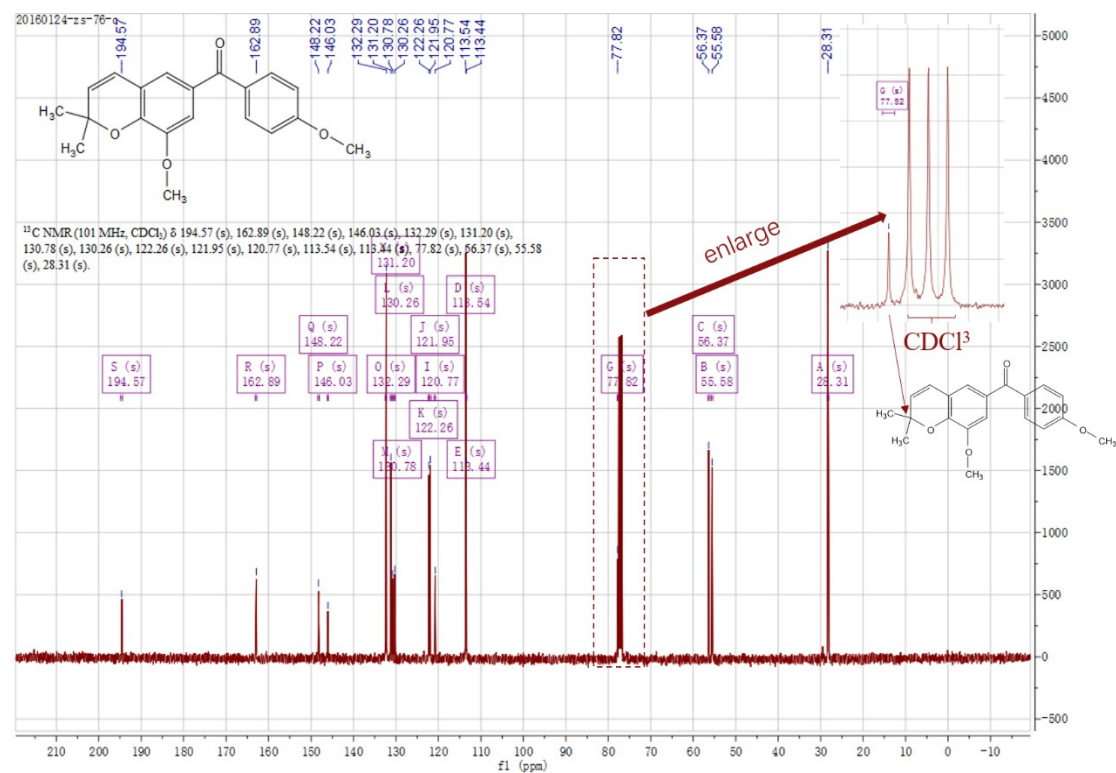

# 5b

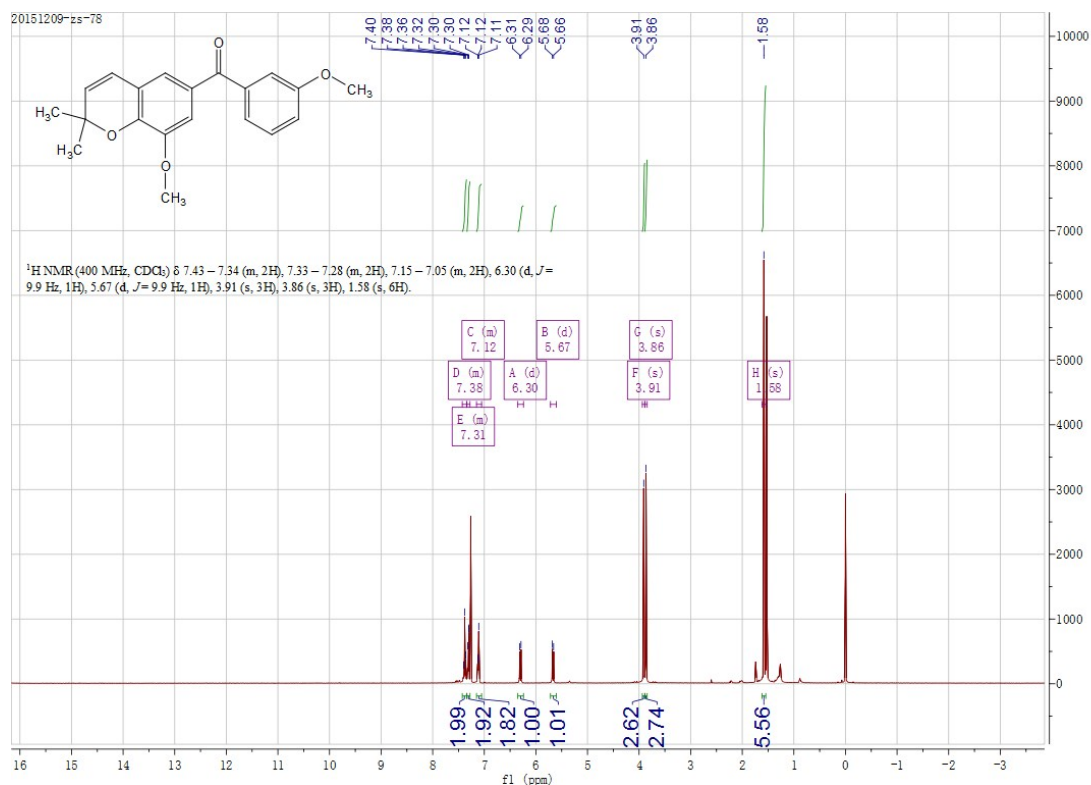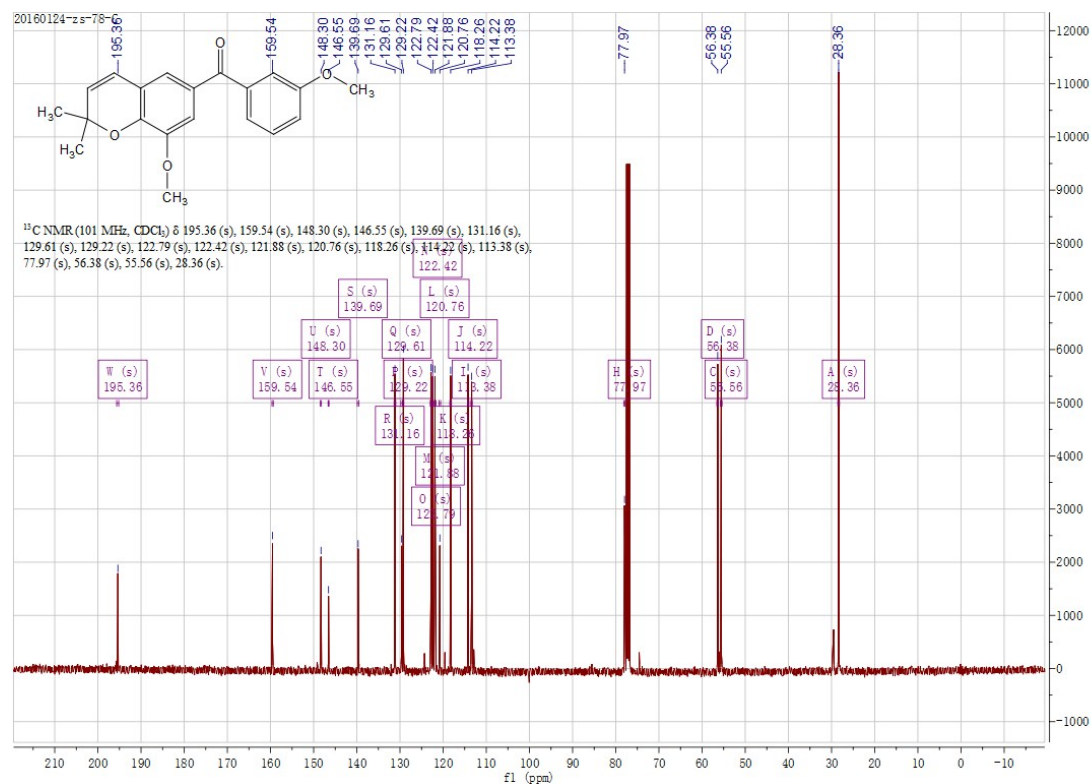

5c

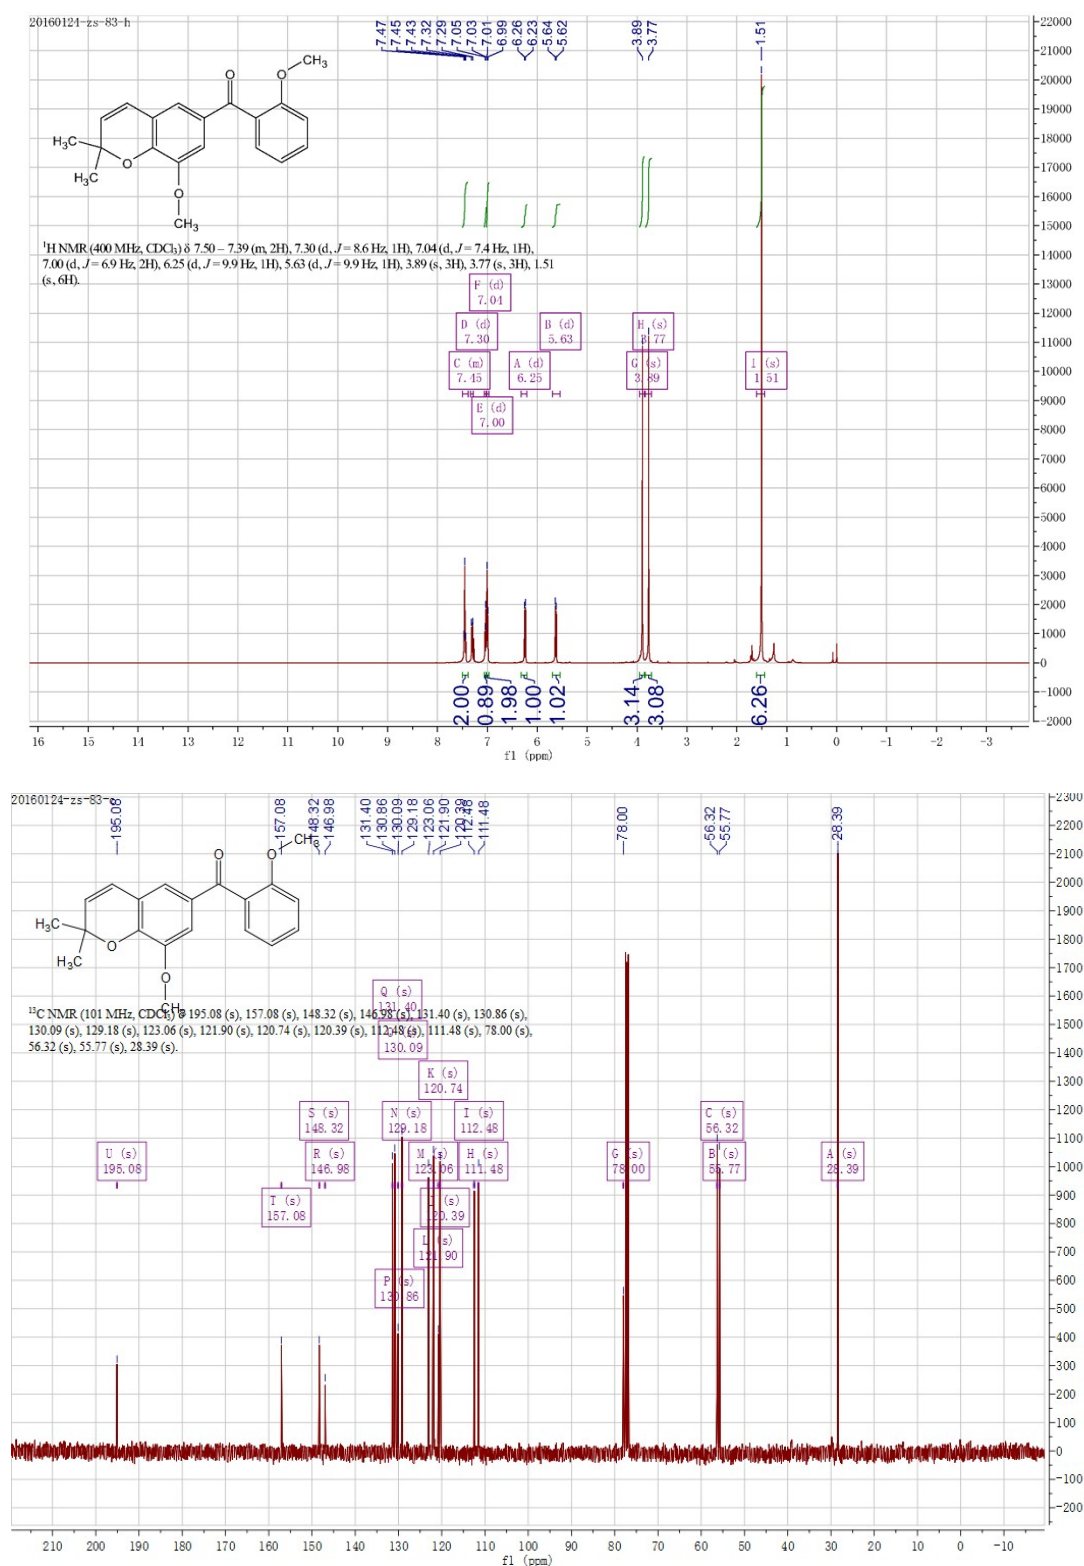

# 5d

20151206-zs-80

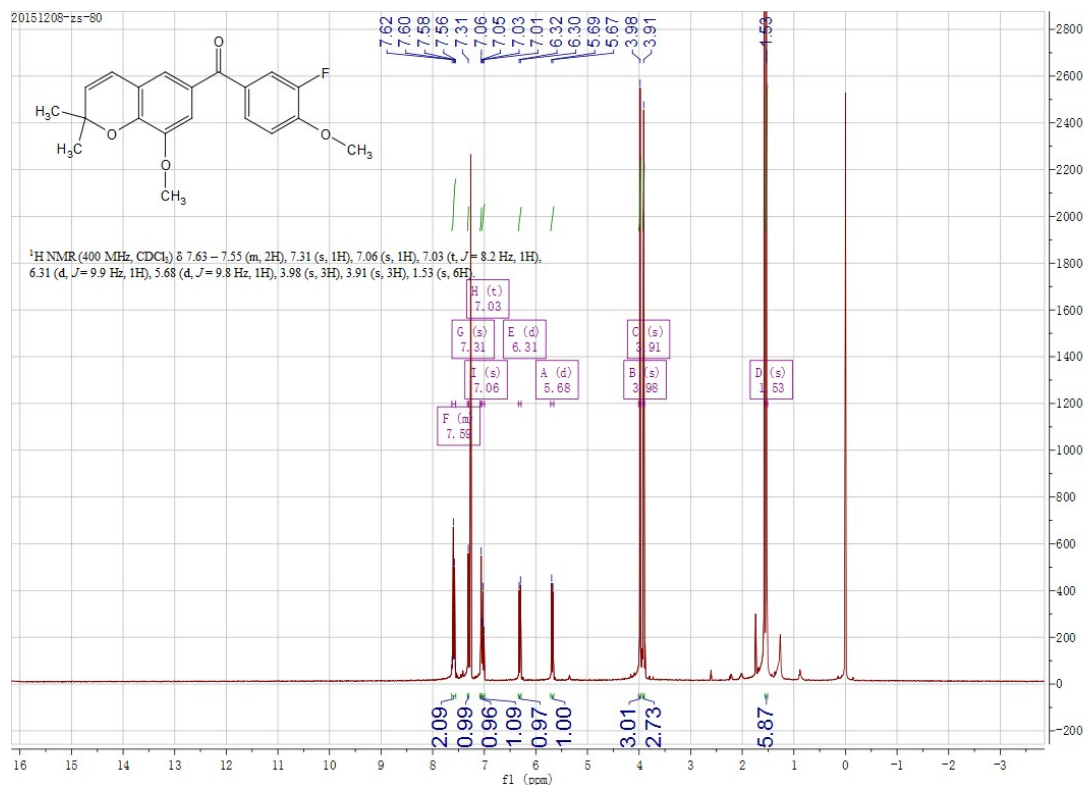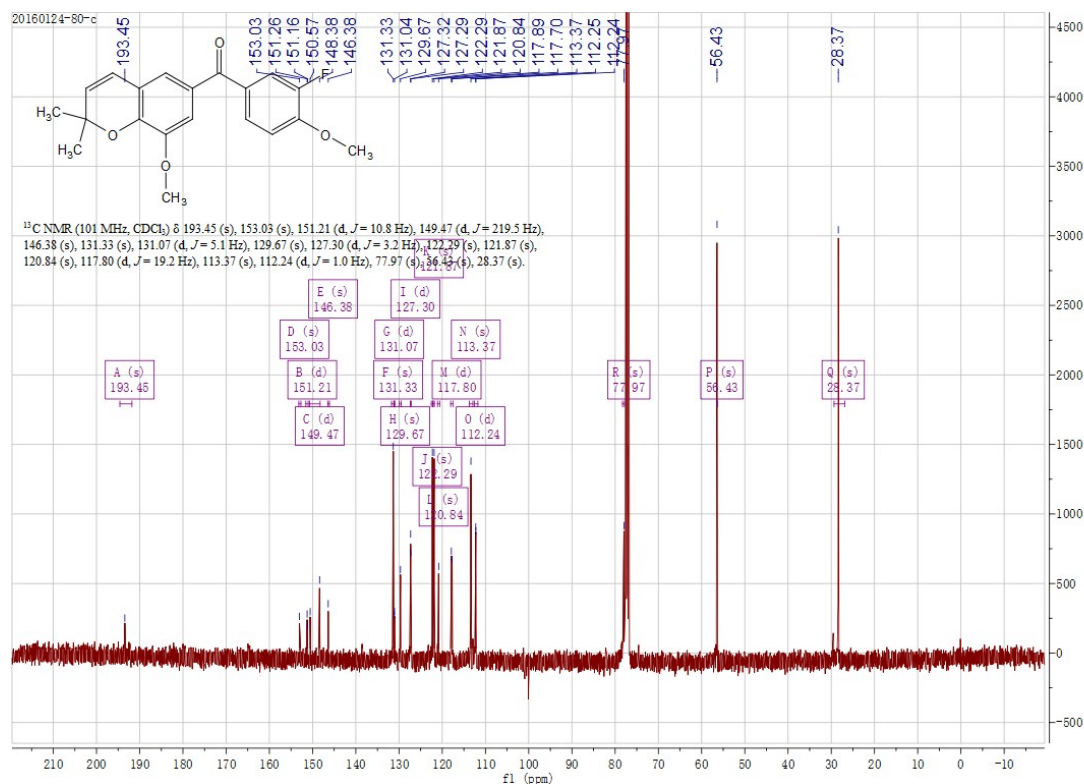

5e

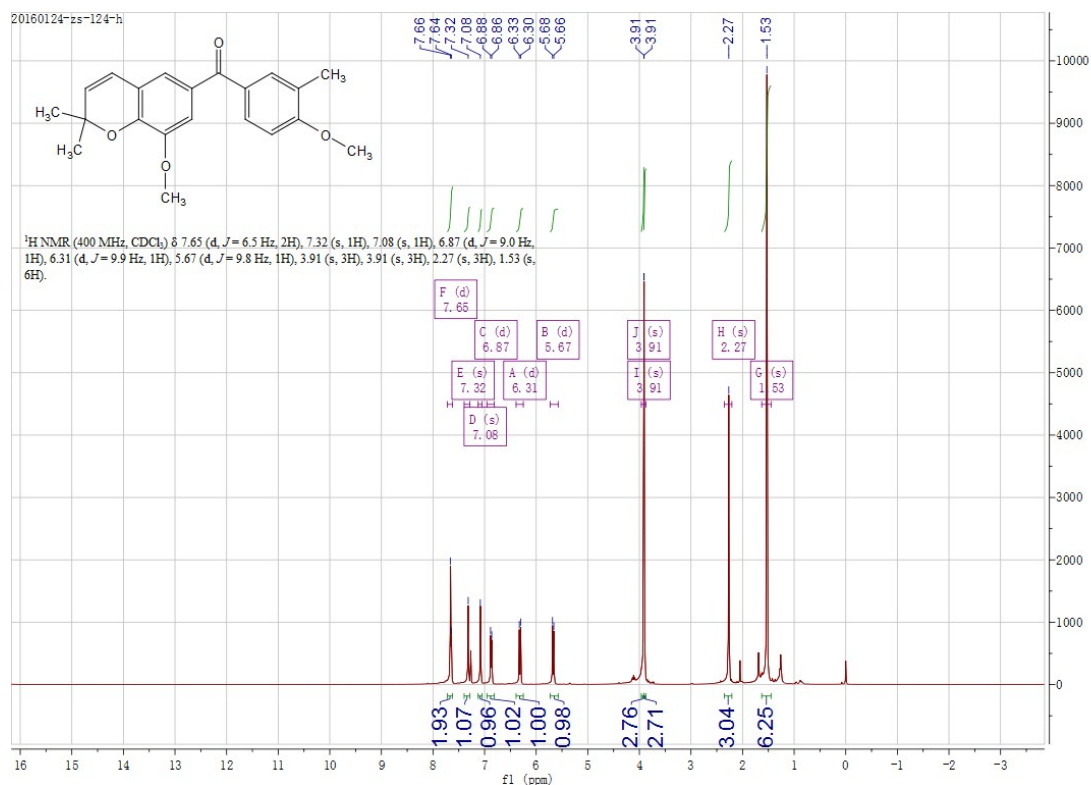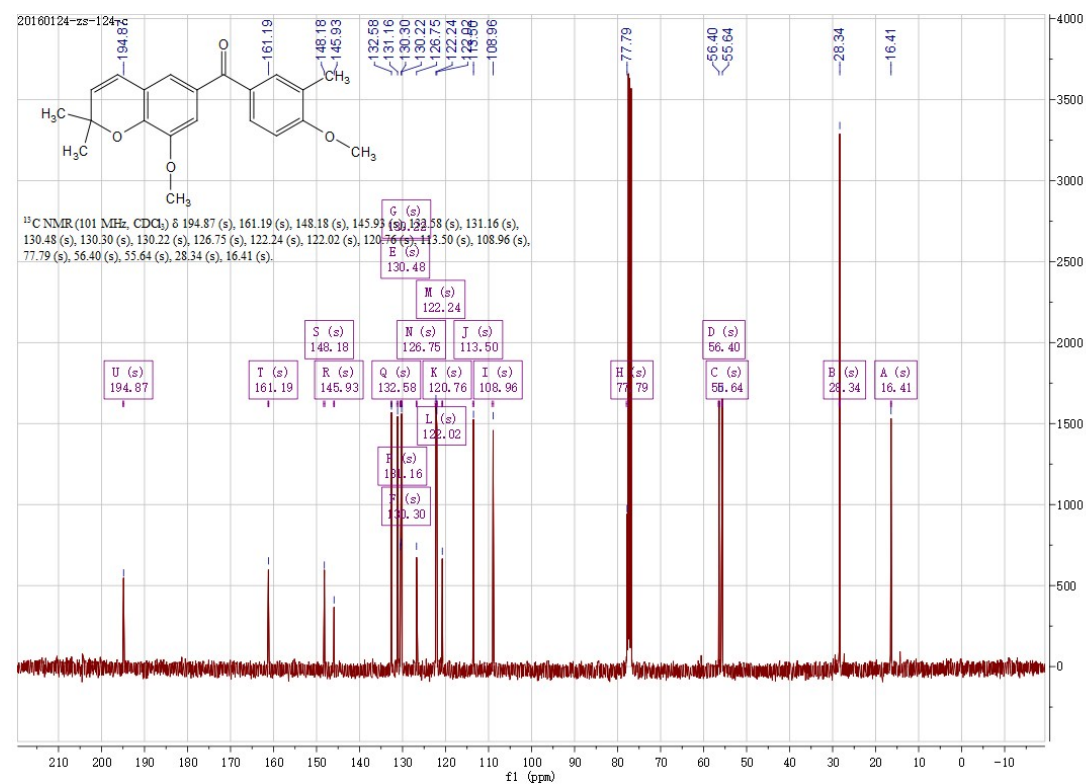

5f

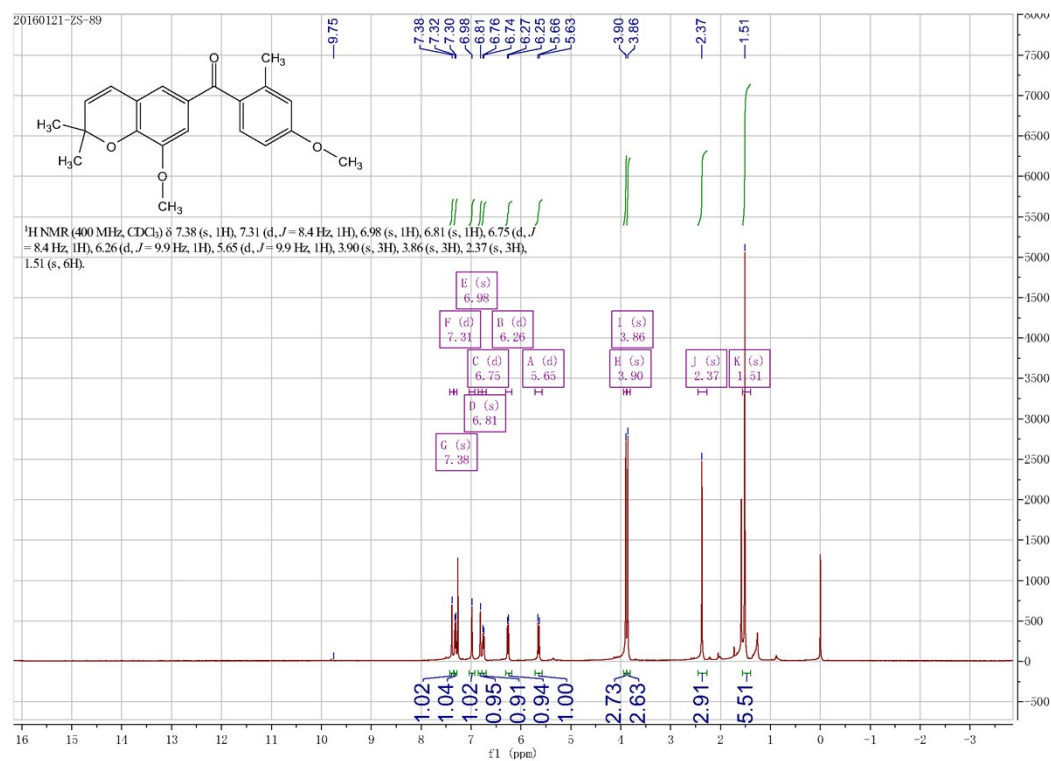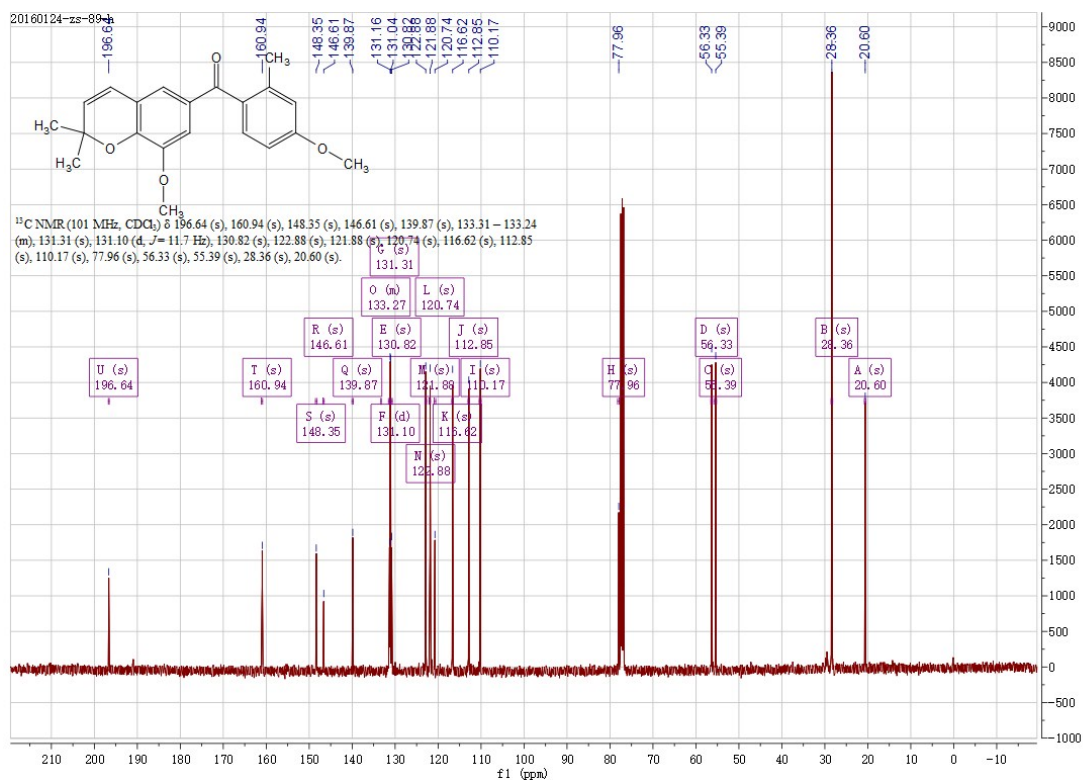

5g

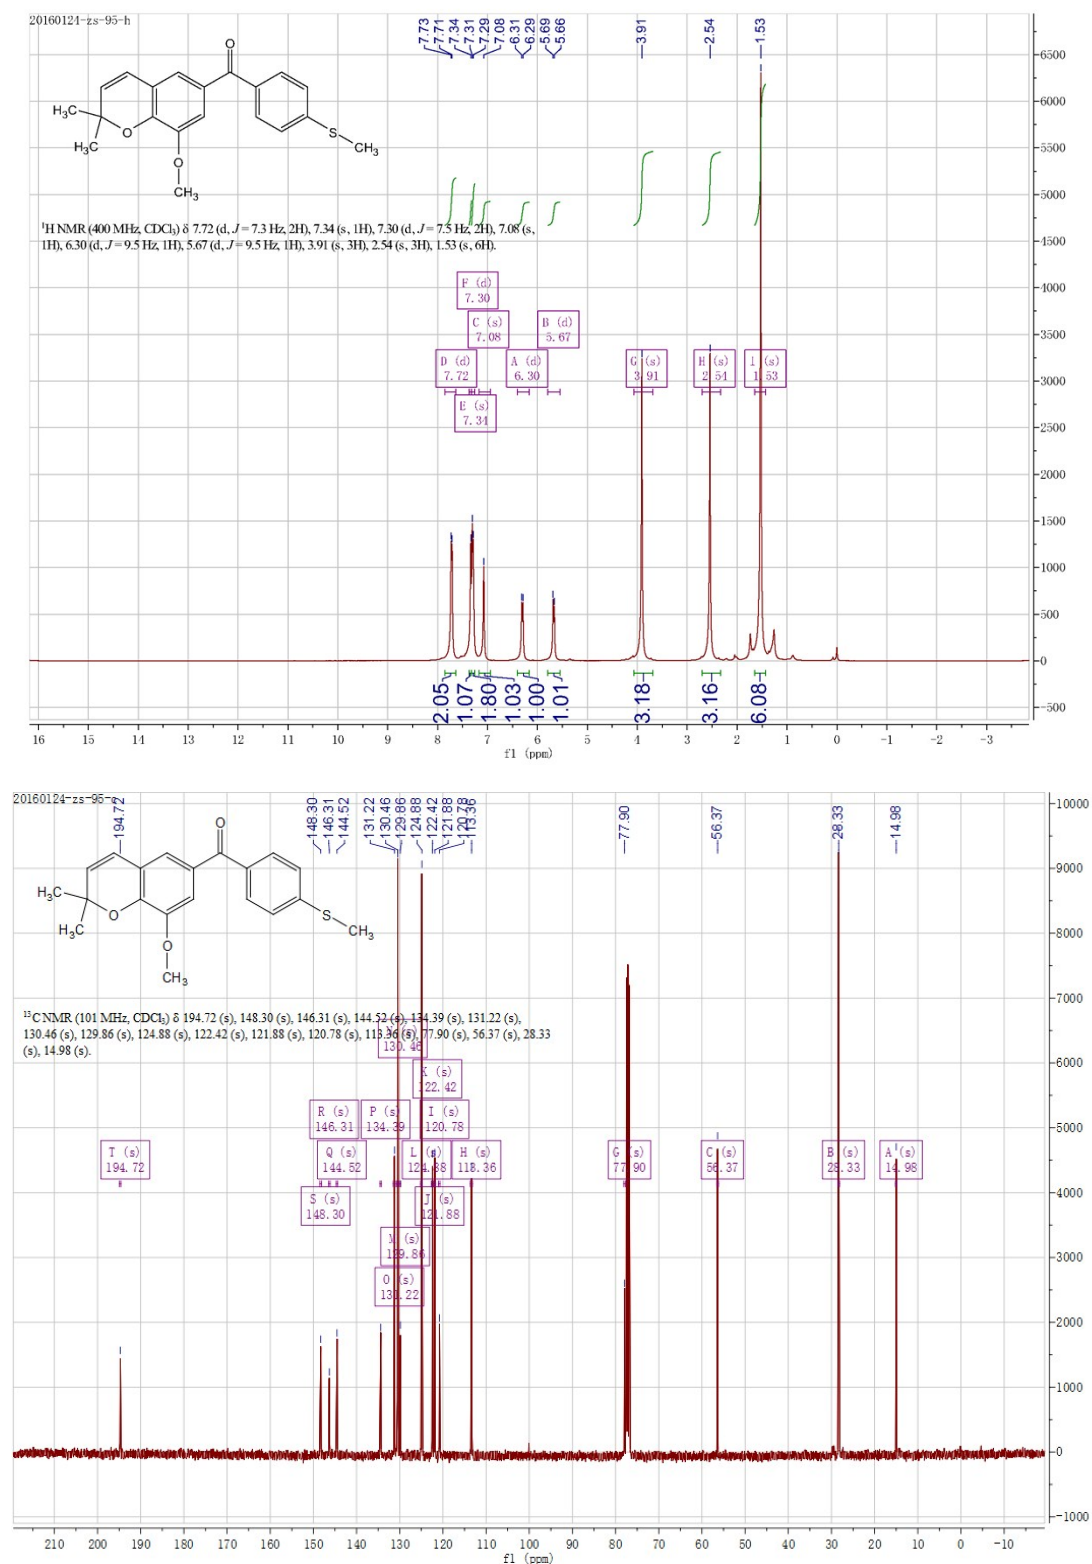

5h

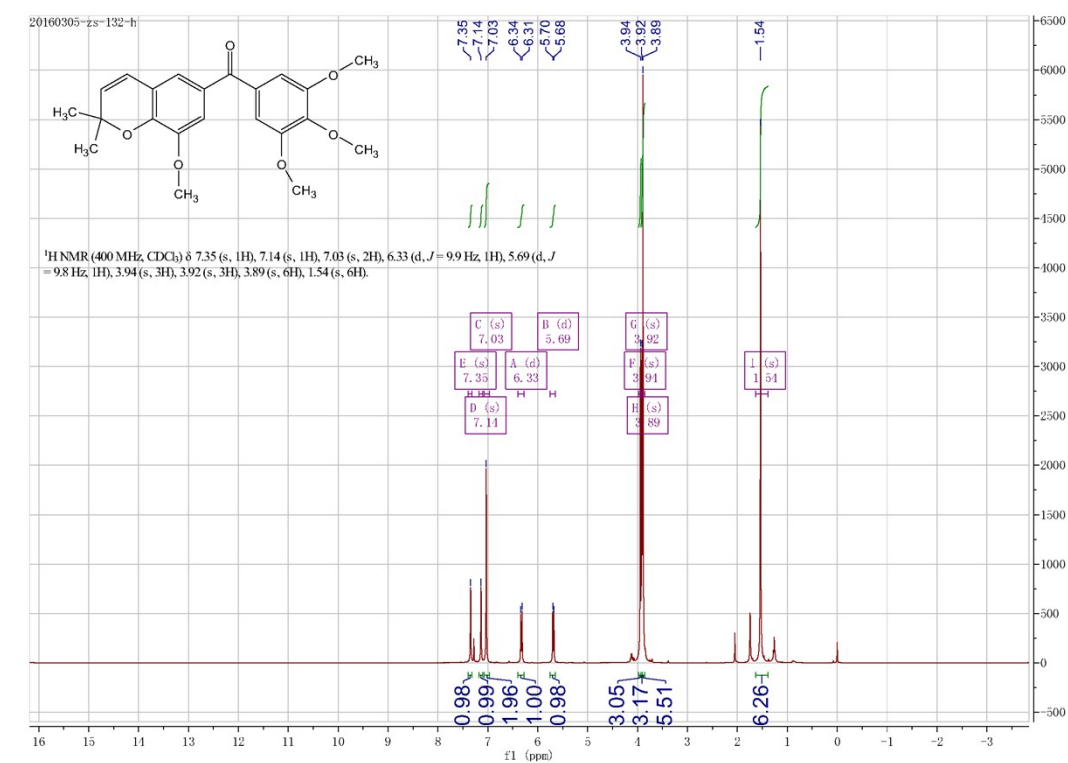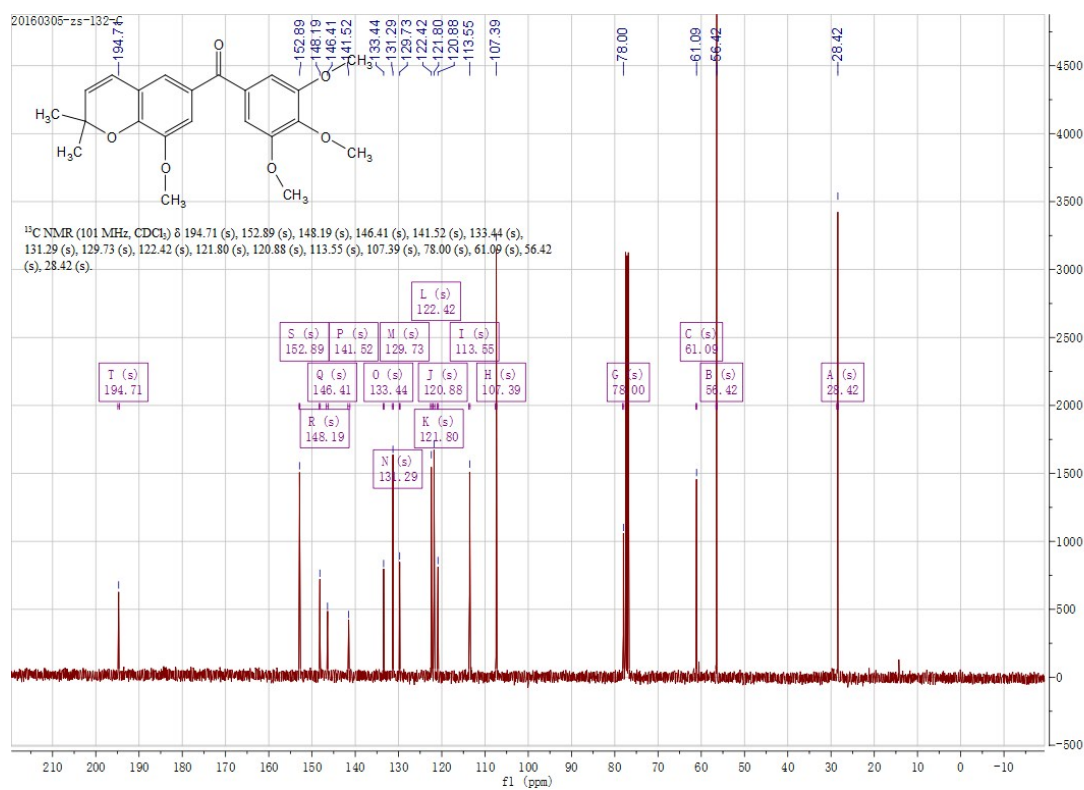

# 10a

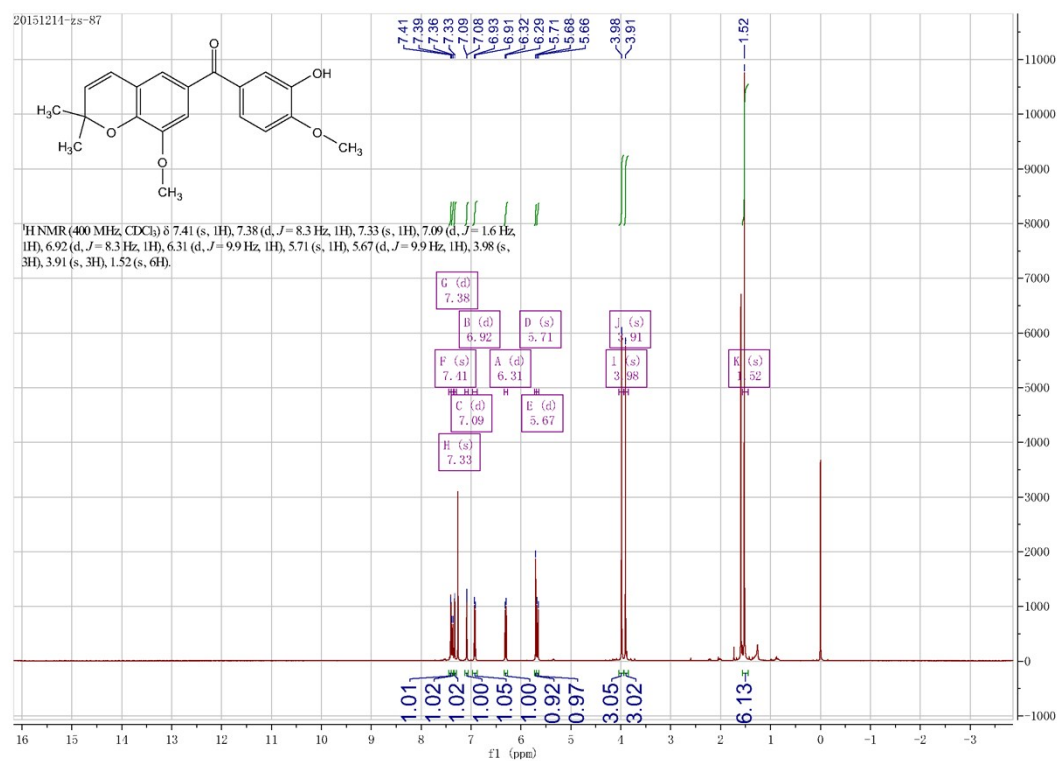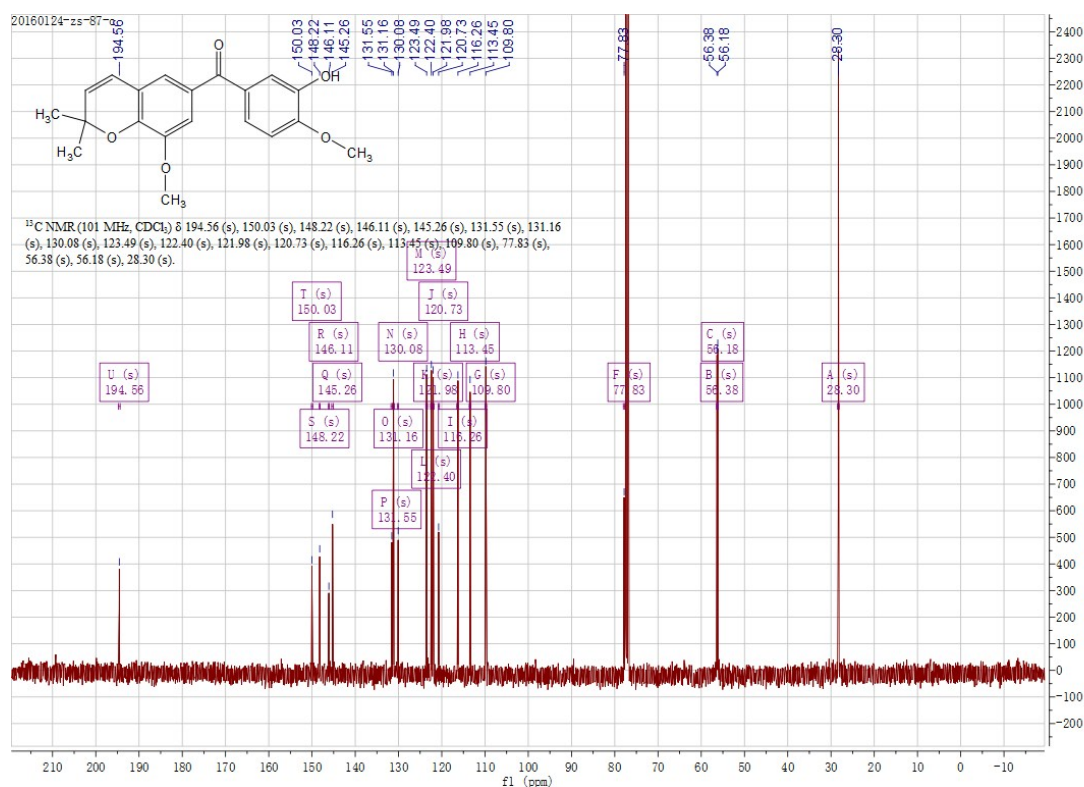

10b

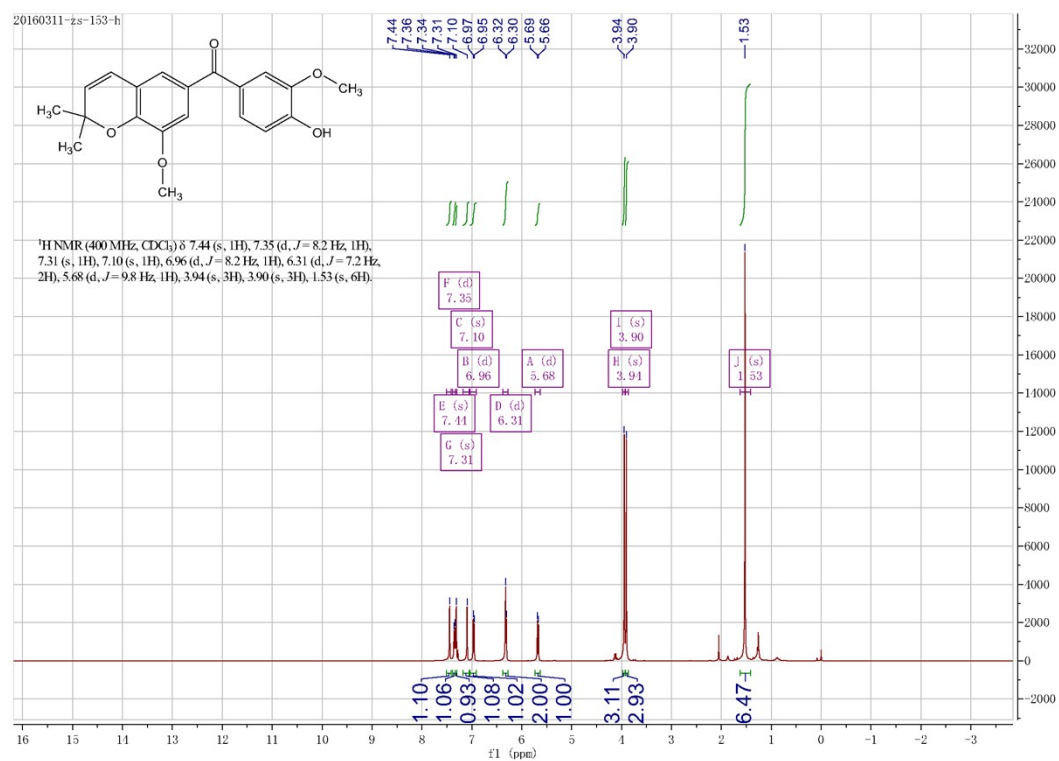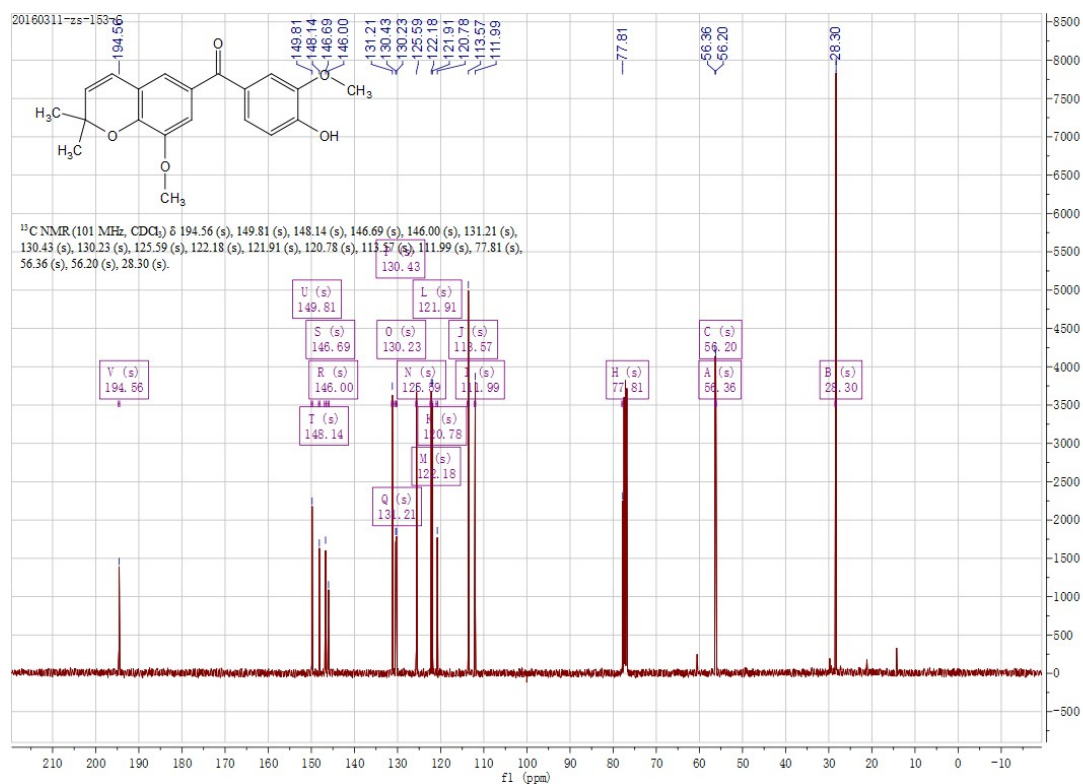

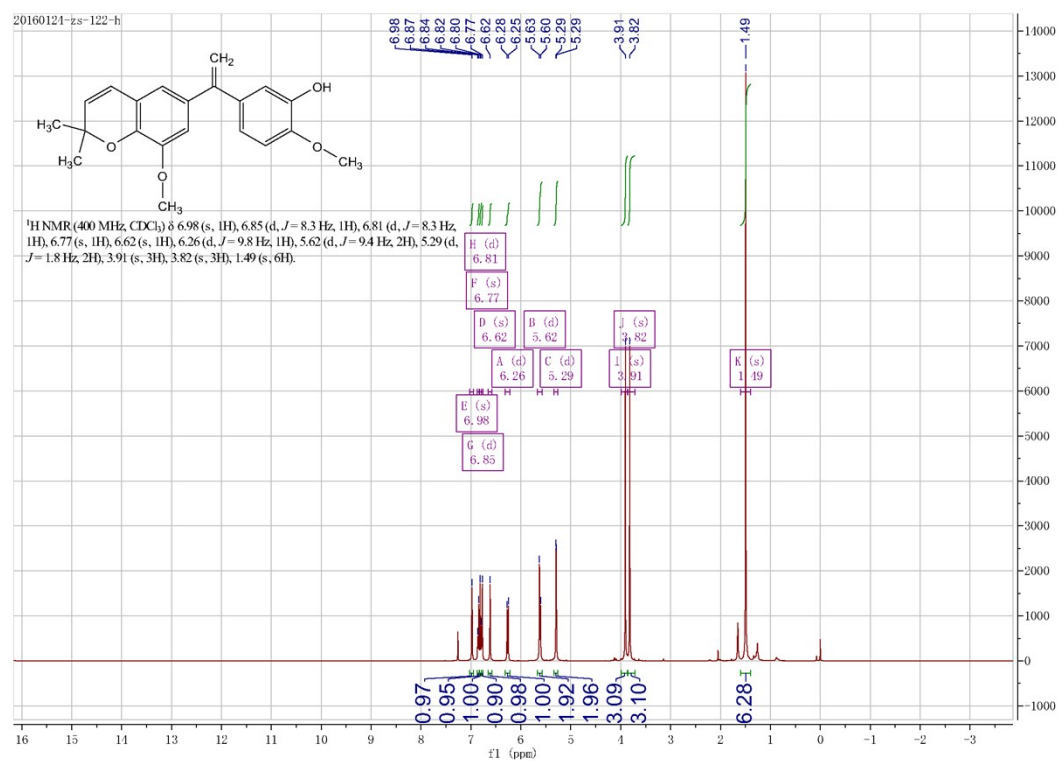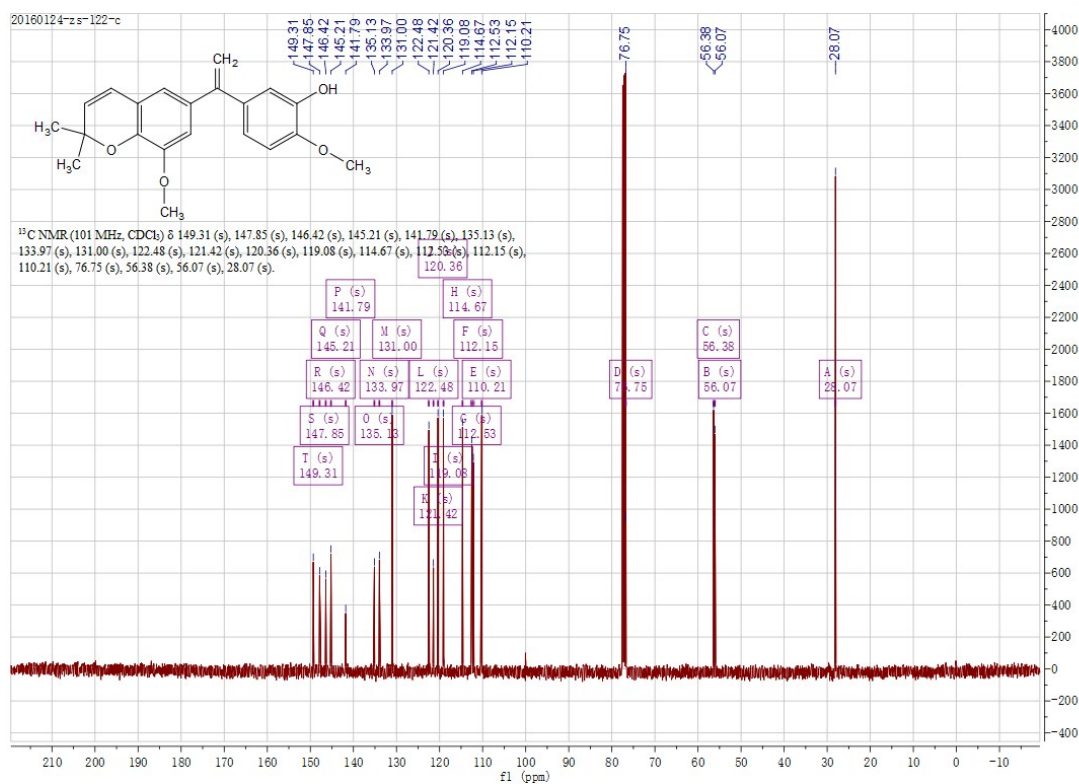

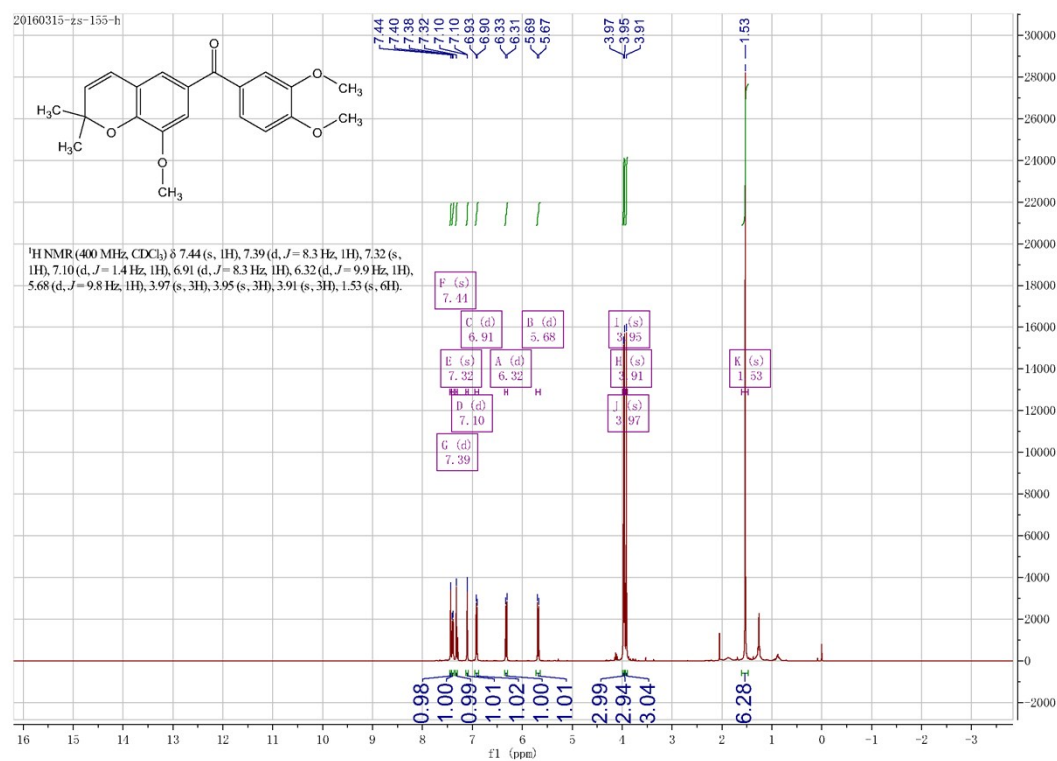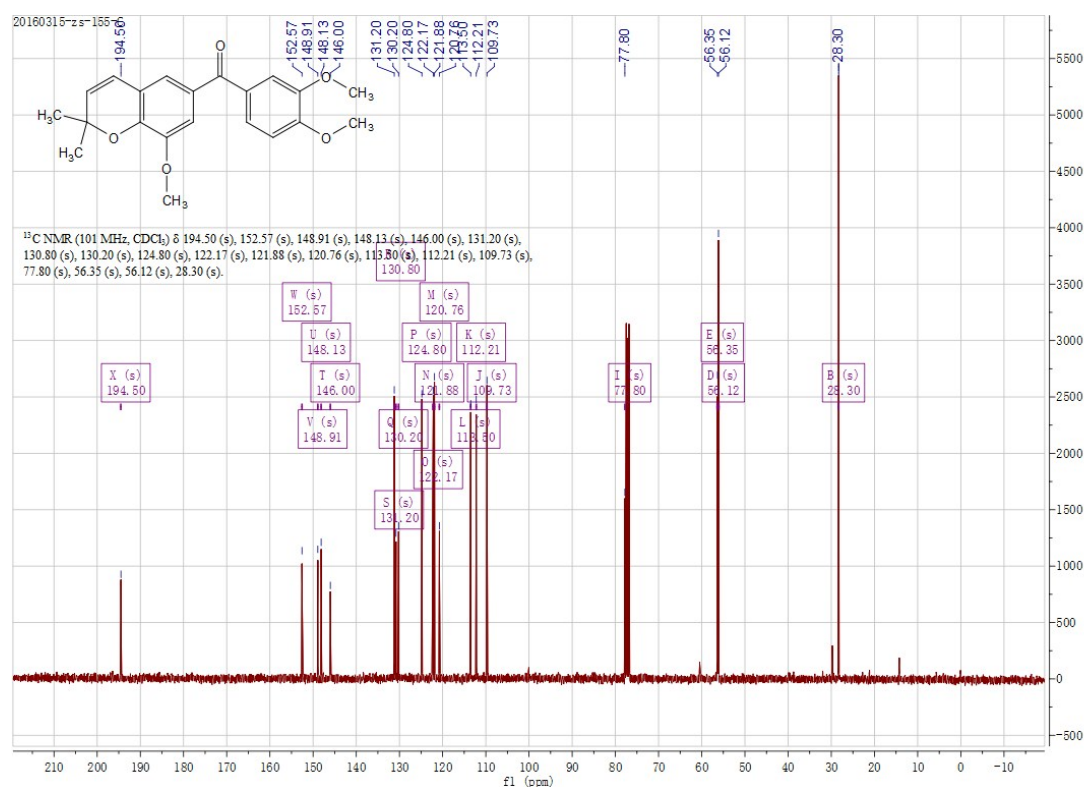

### SI3. NMR spectra of intermediate compounds

2

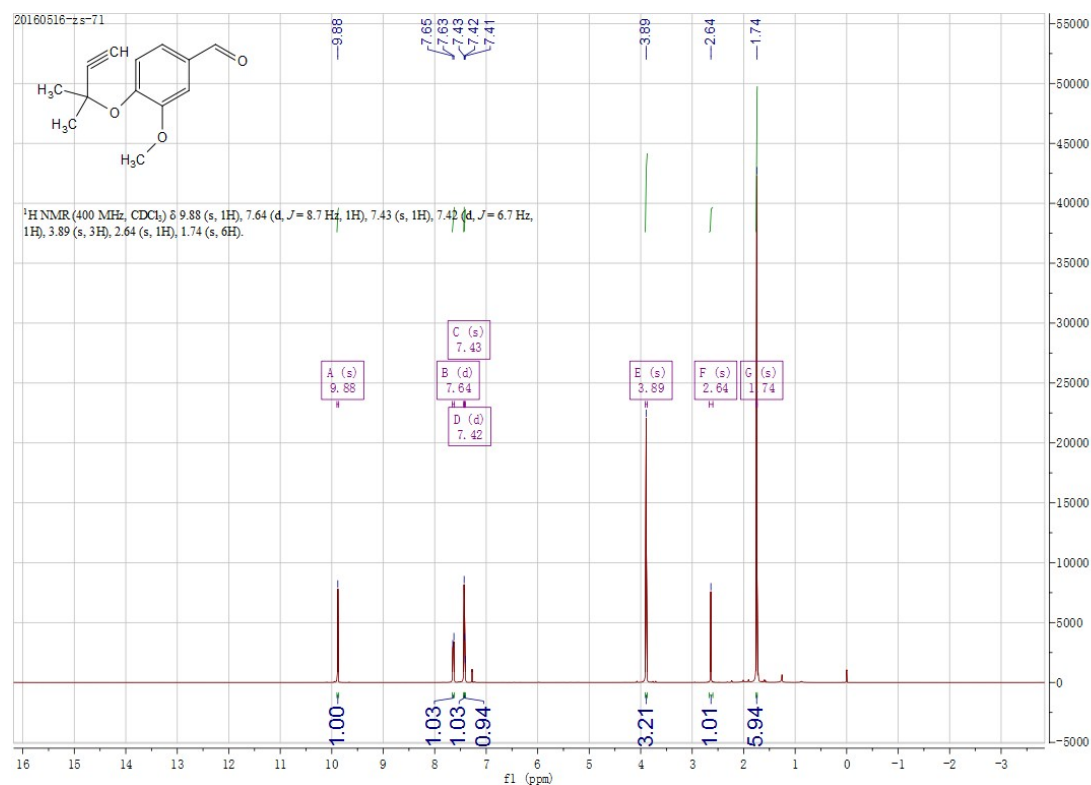

3

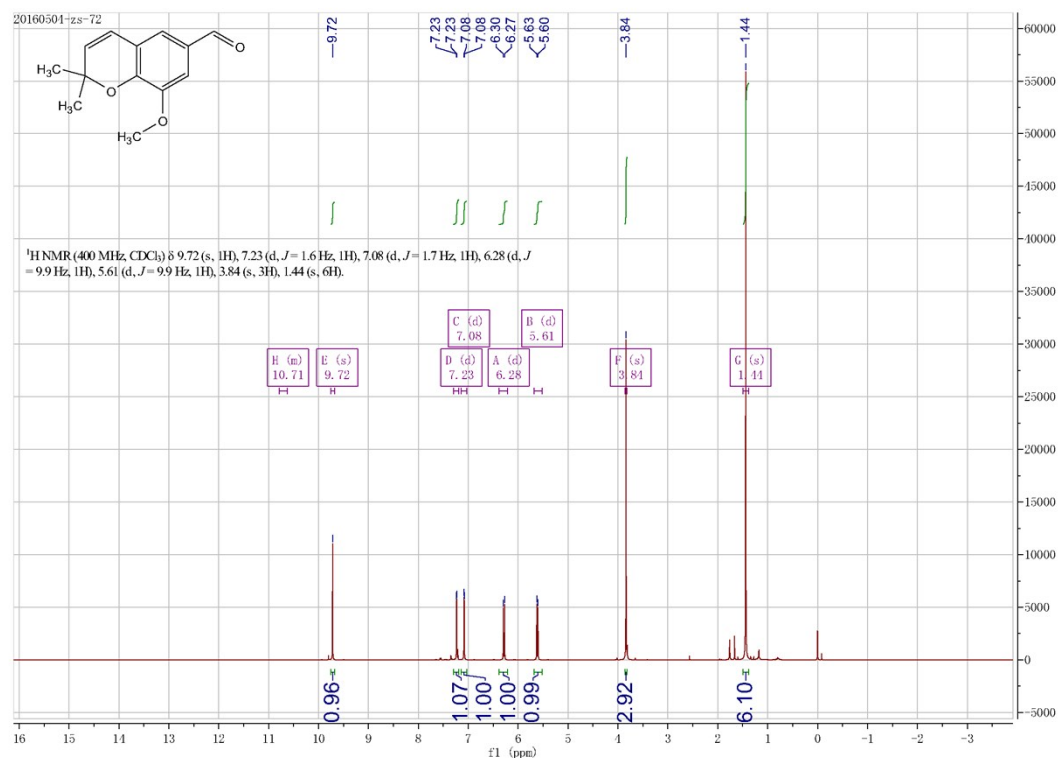

# 4a

20160526-zs-77

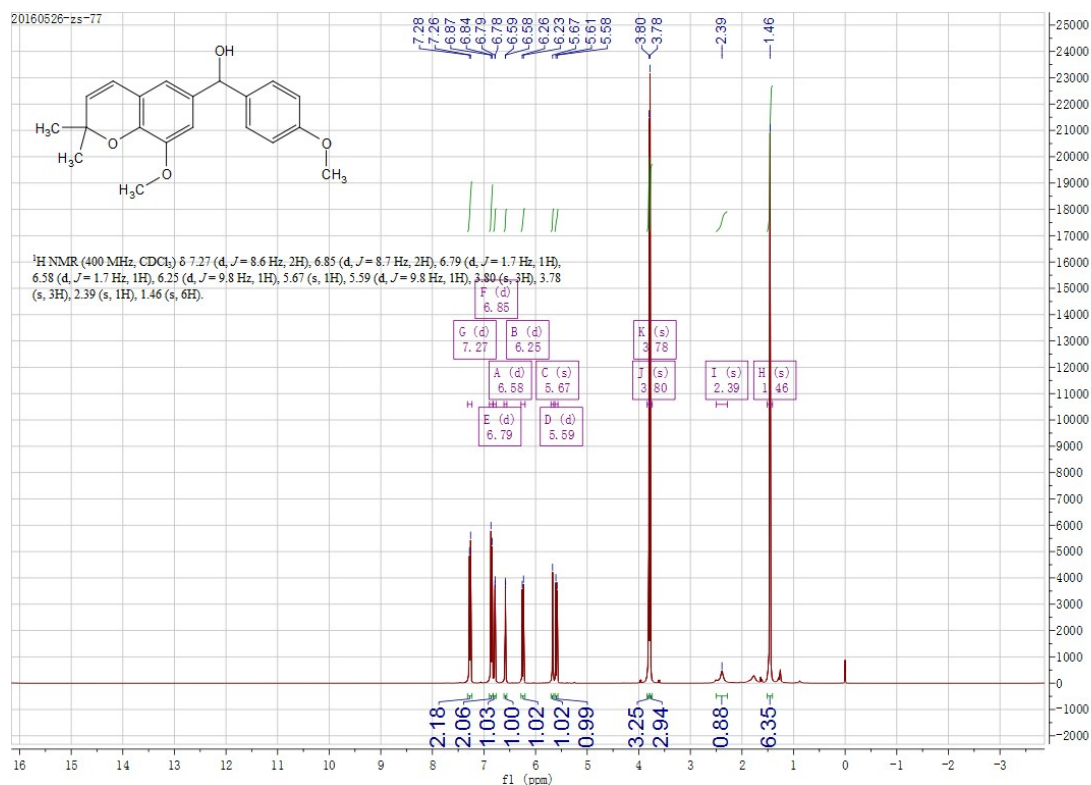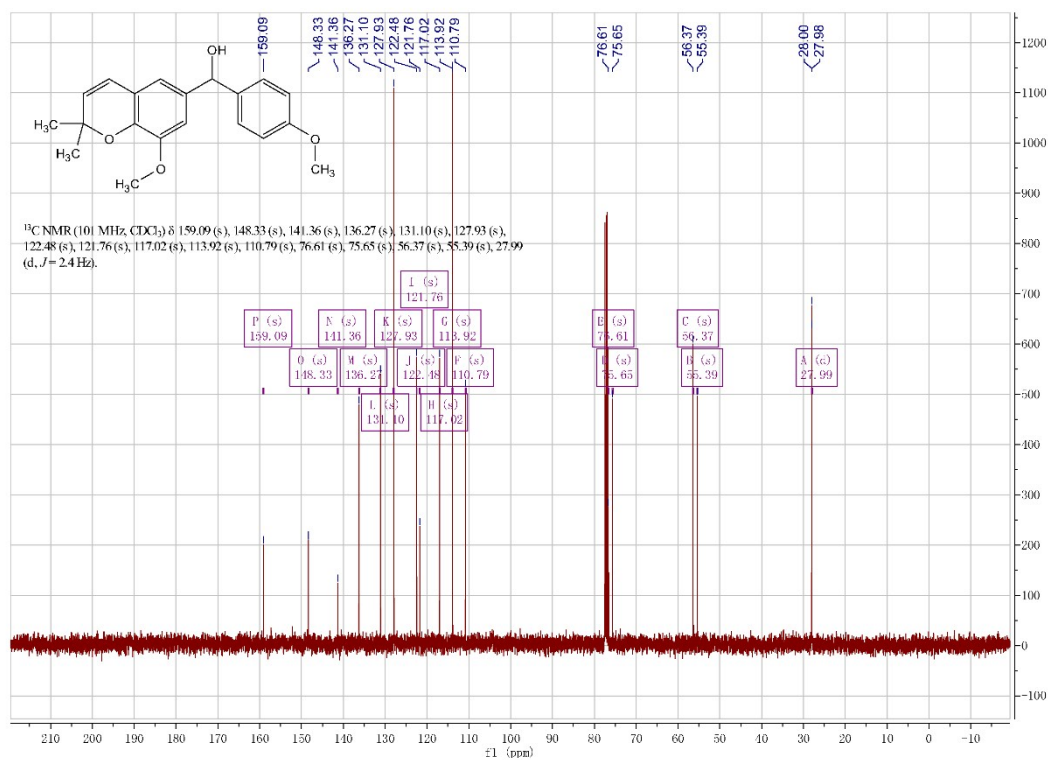

4b

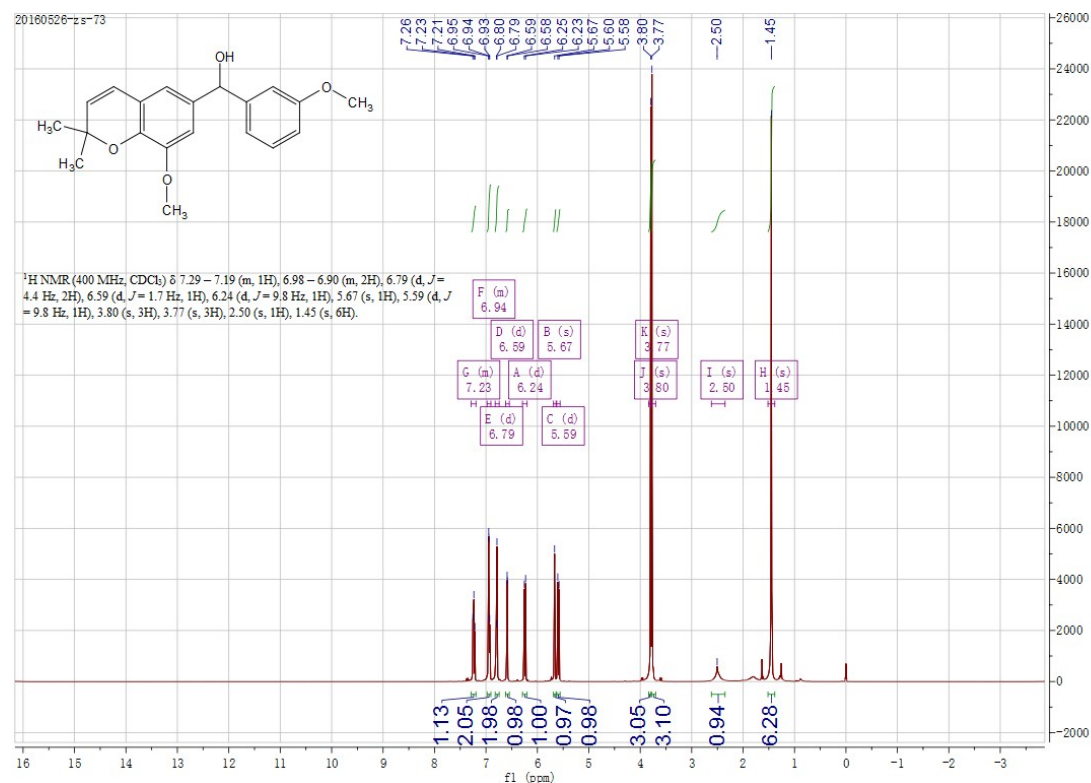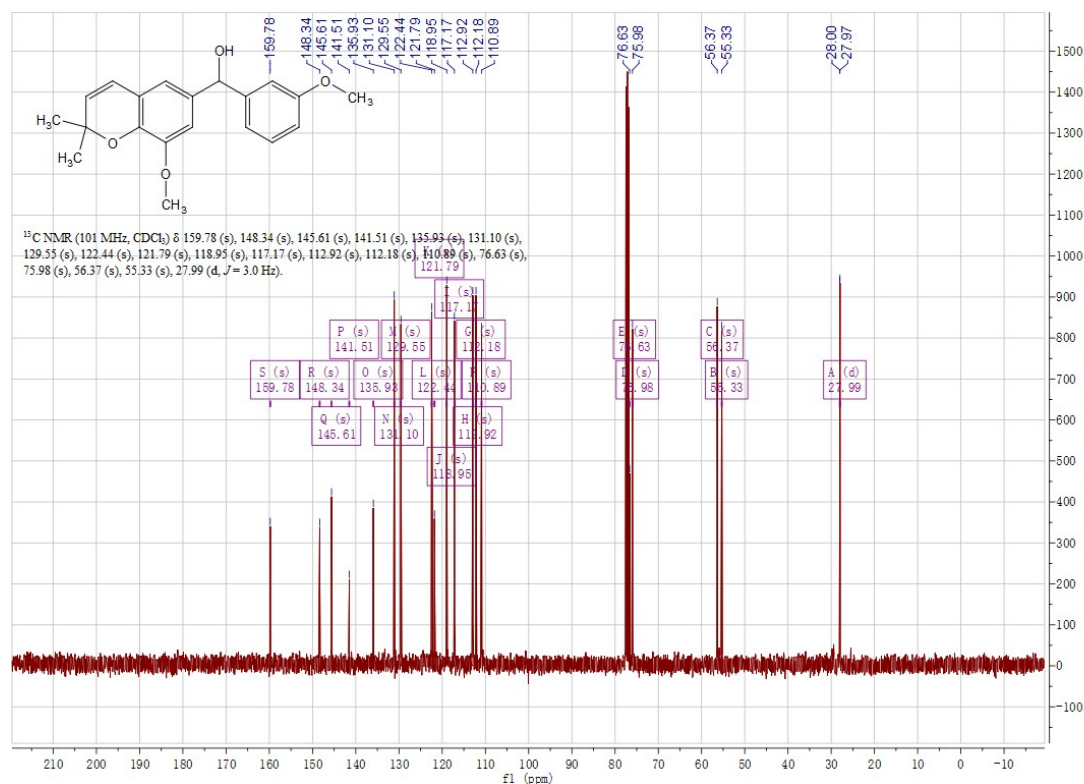

4c

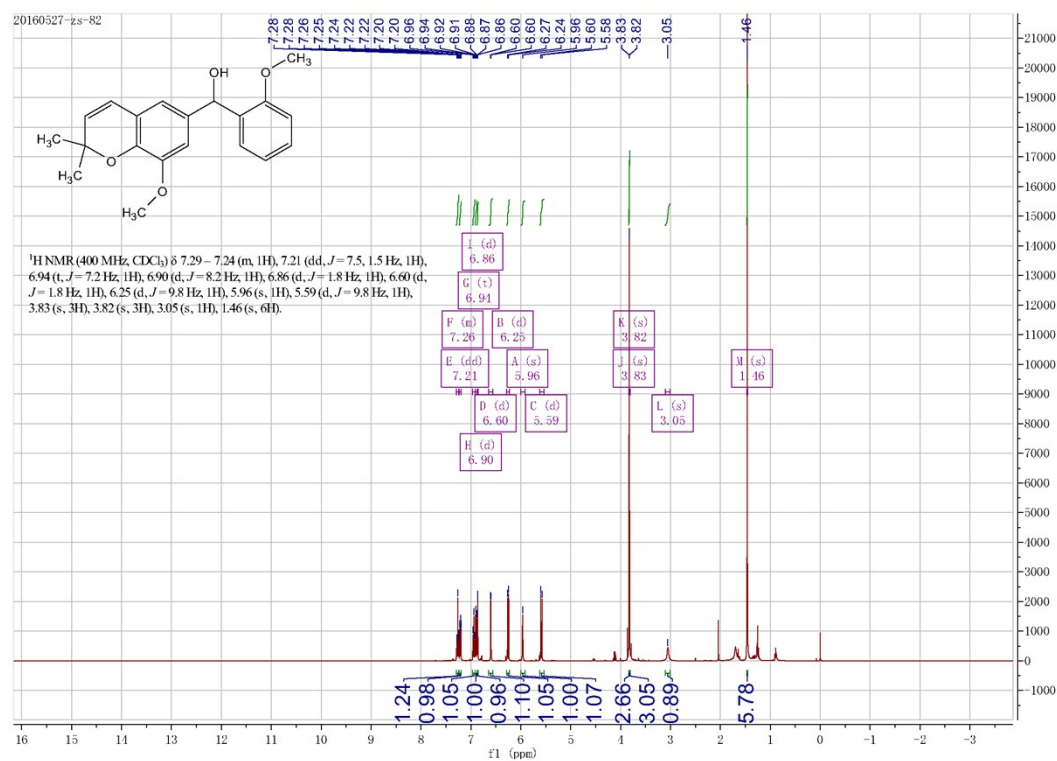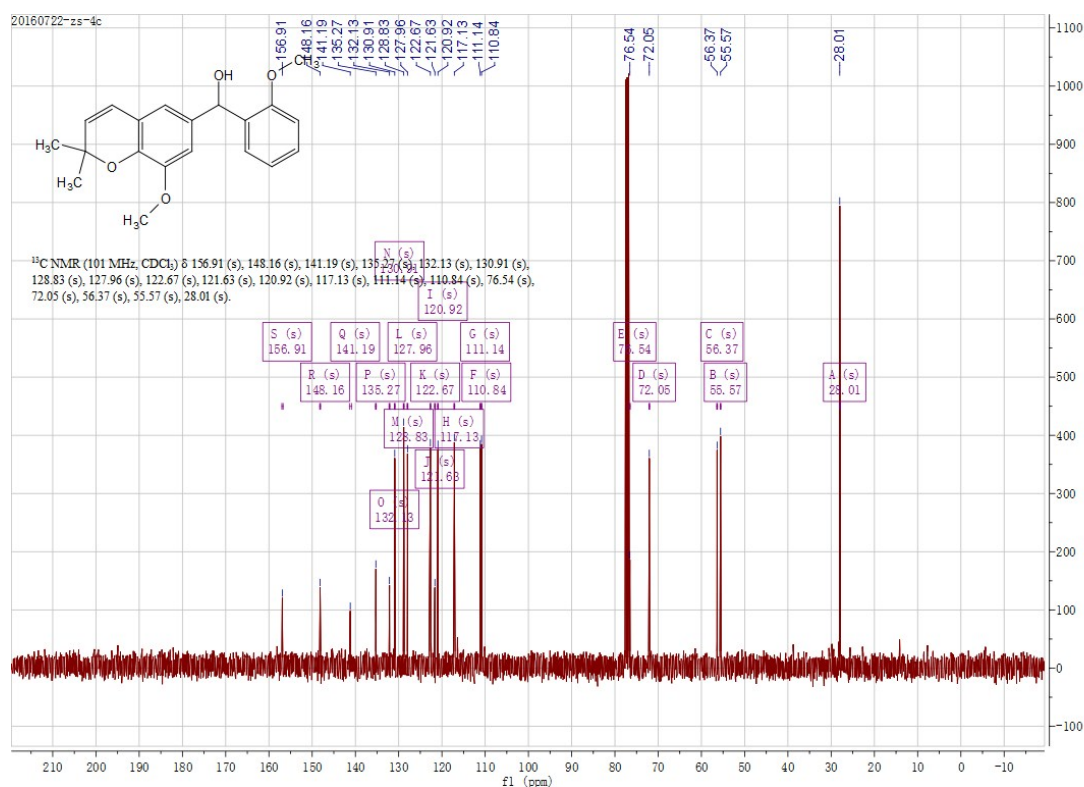

4d

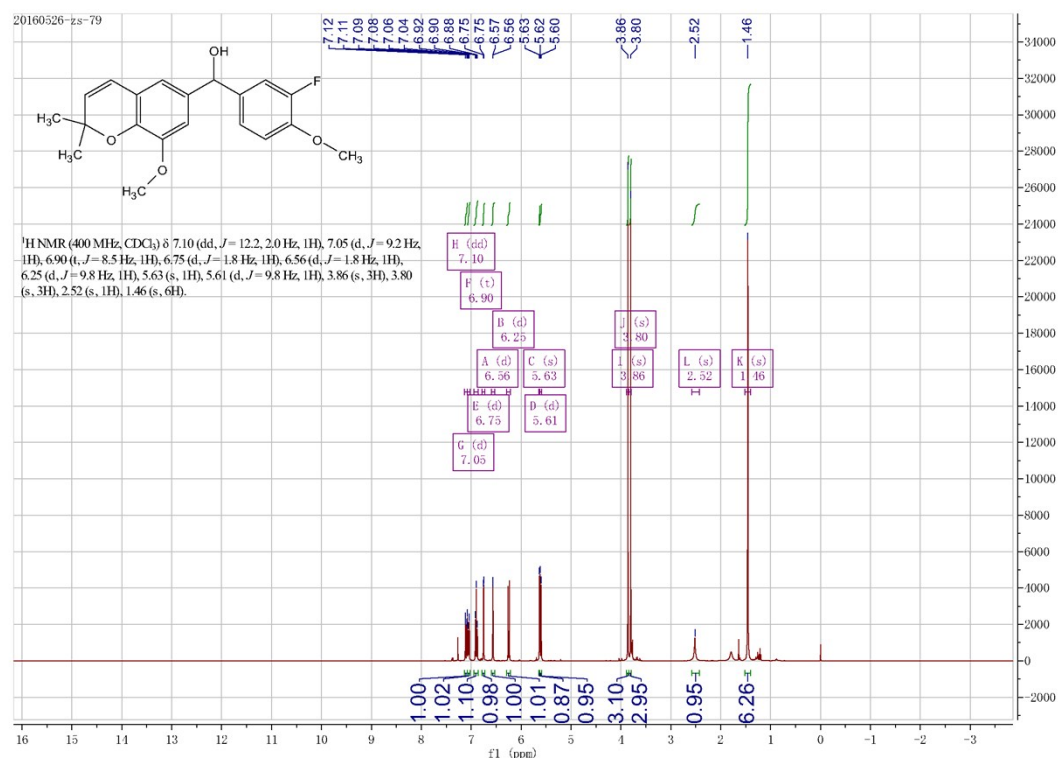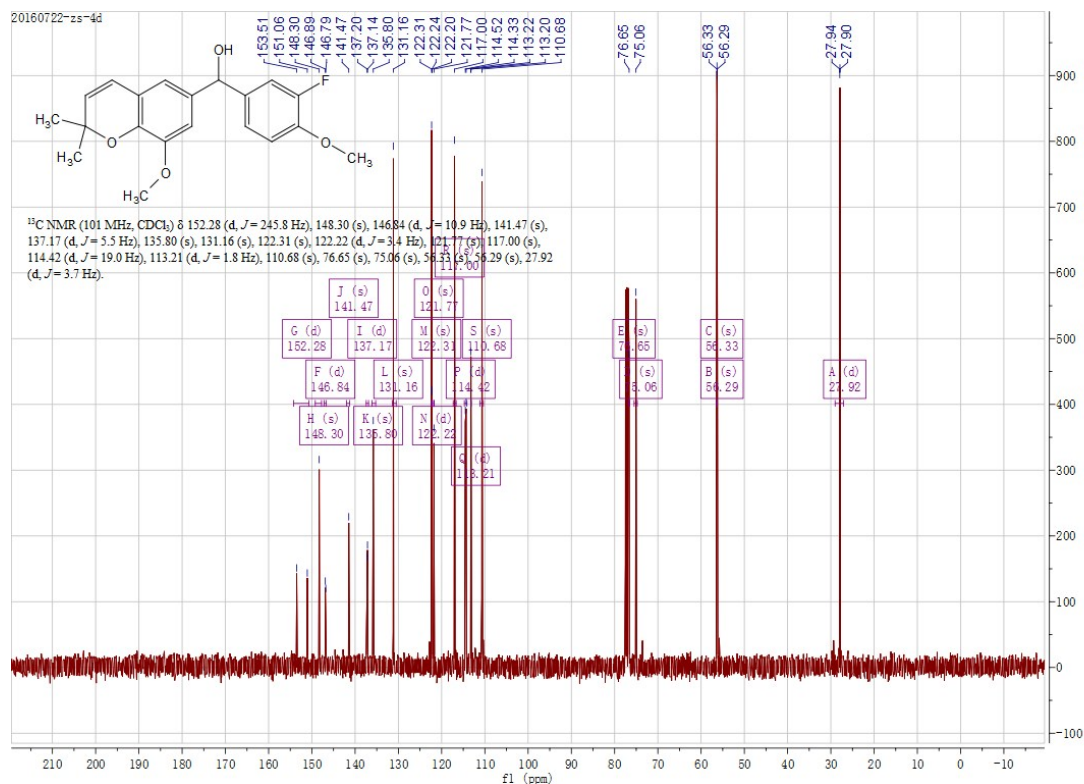

4e

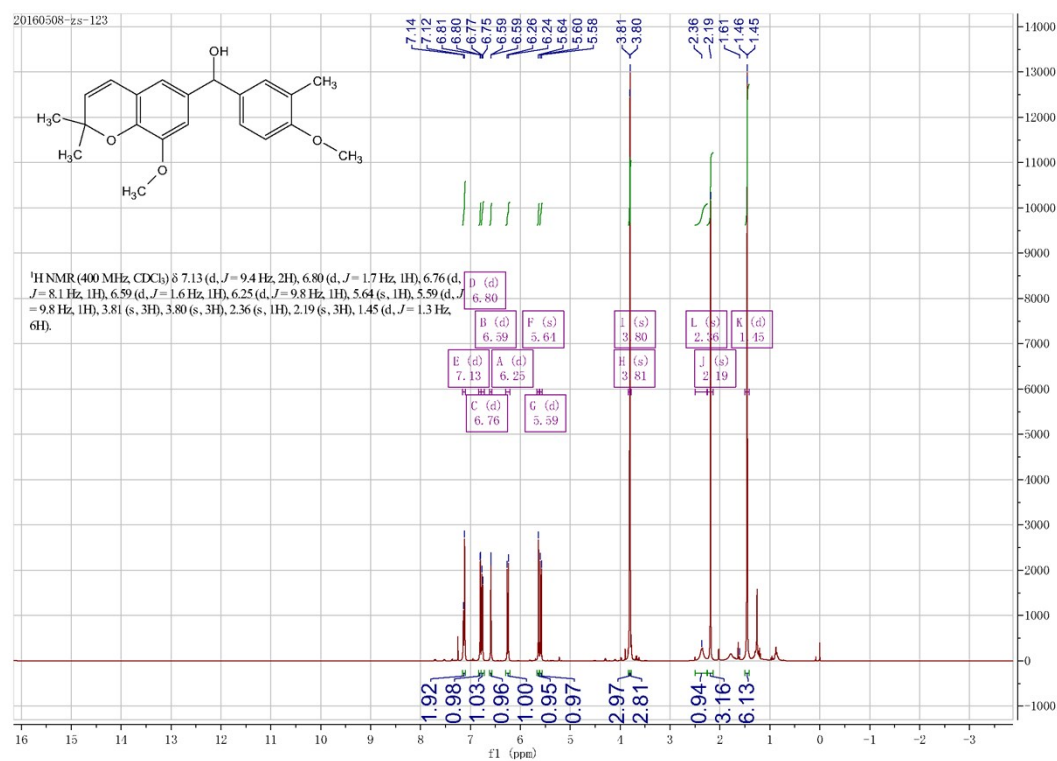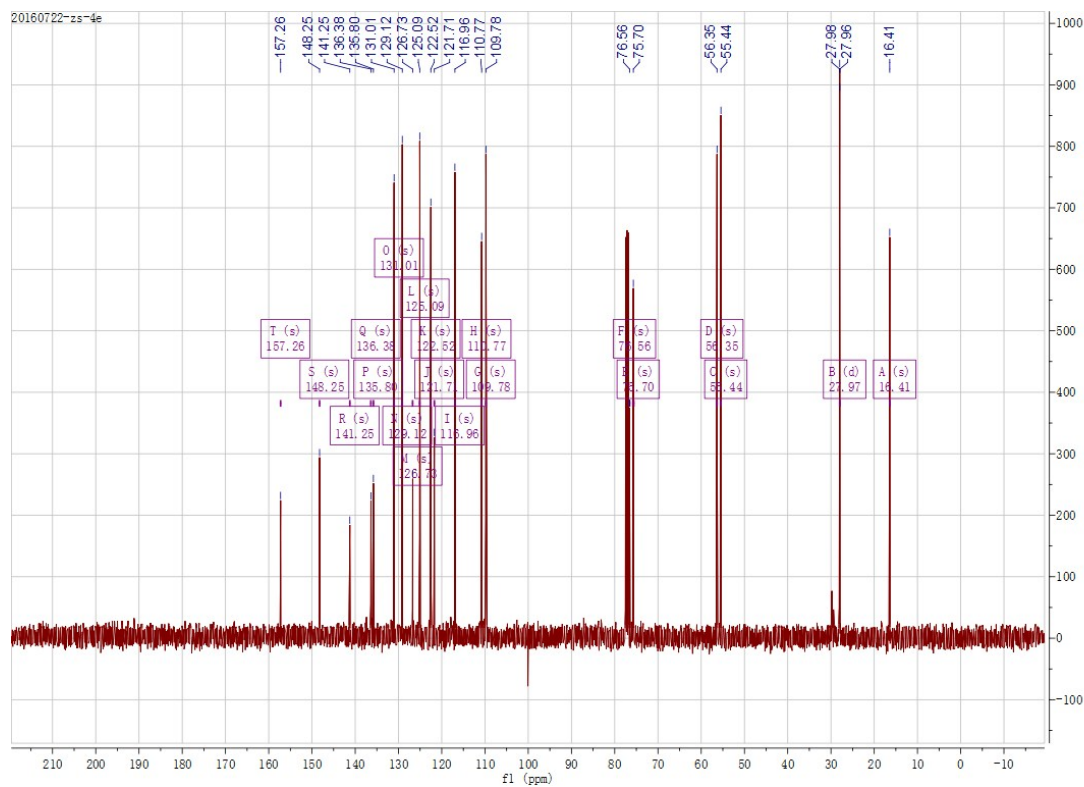

4f

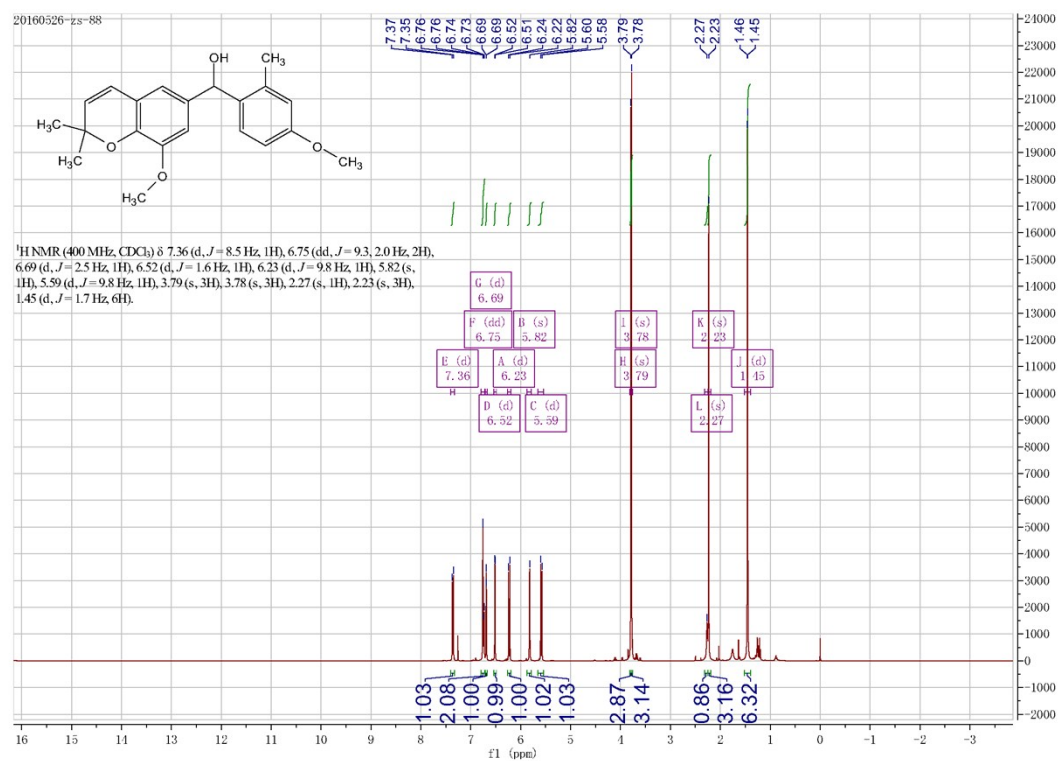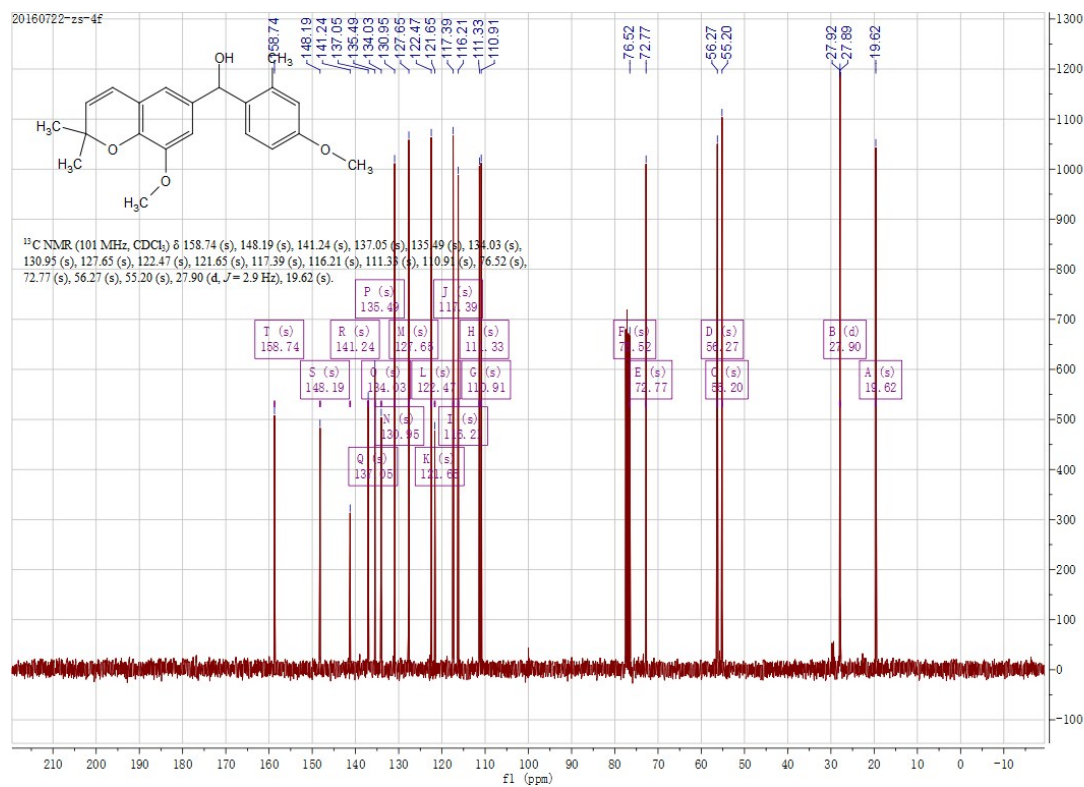

4g

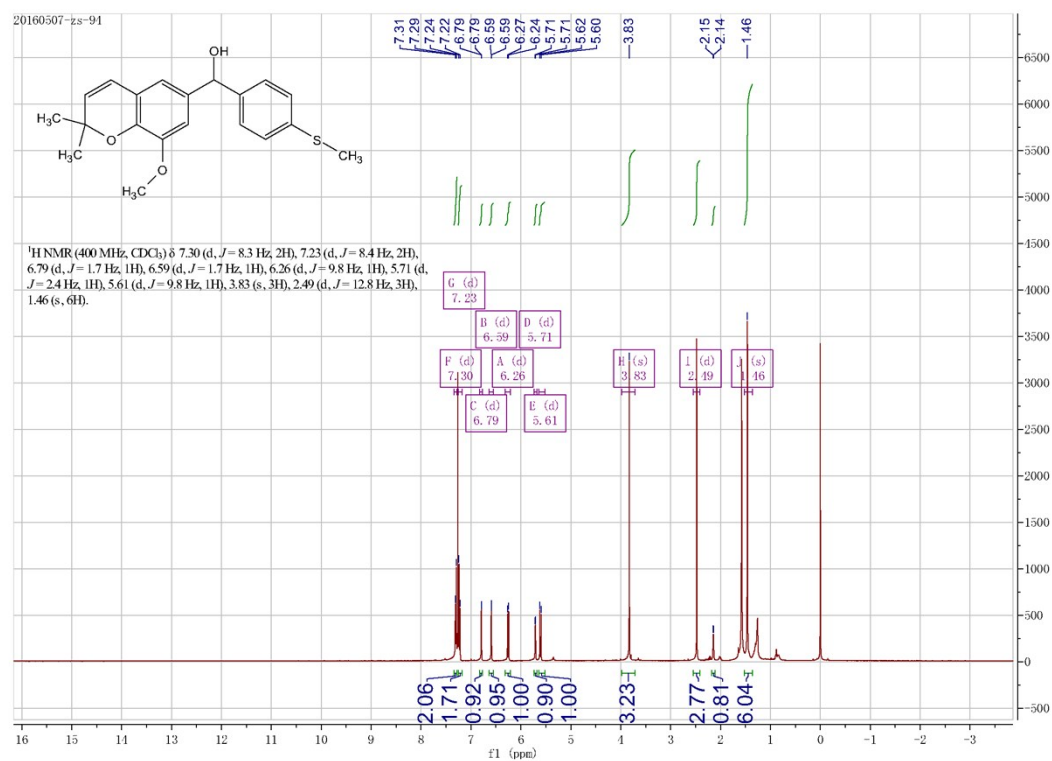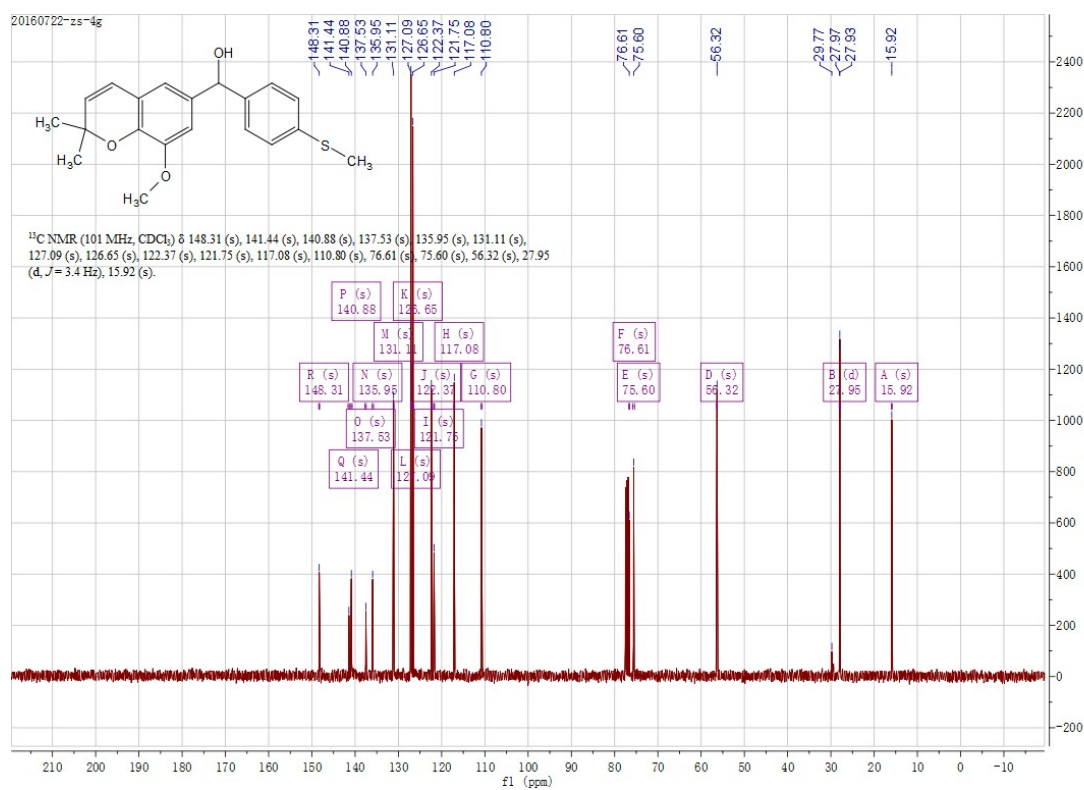

# 4h

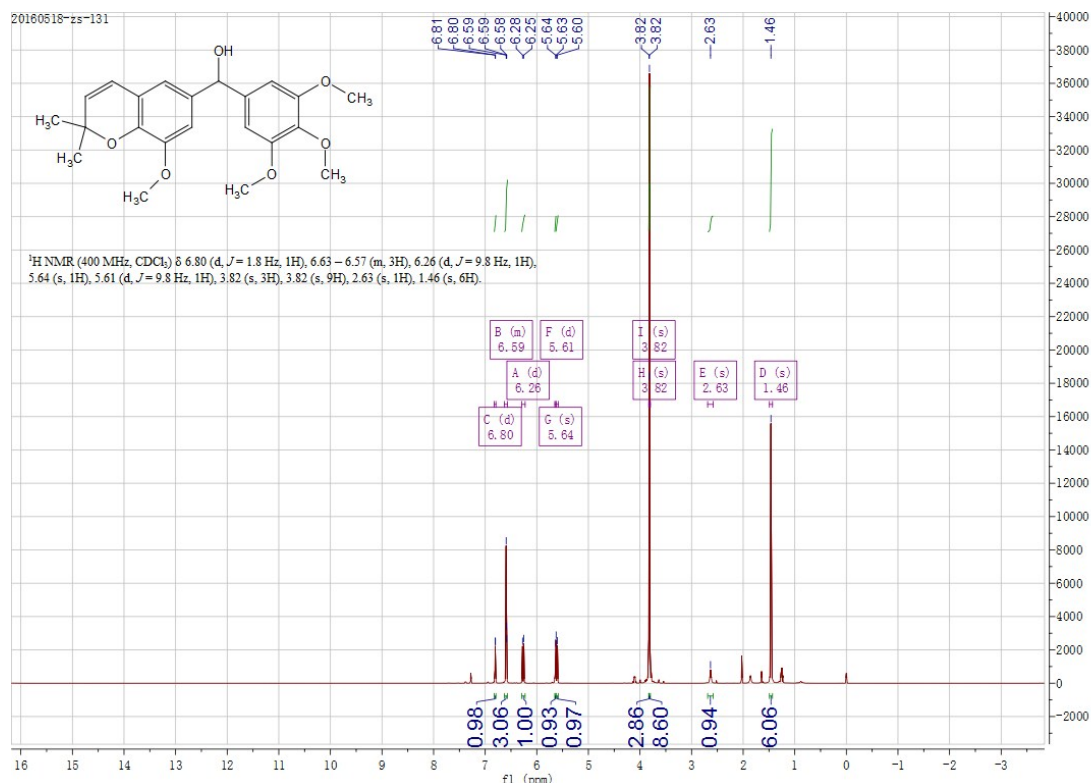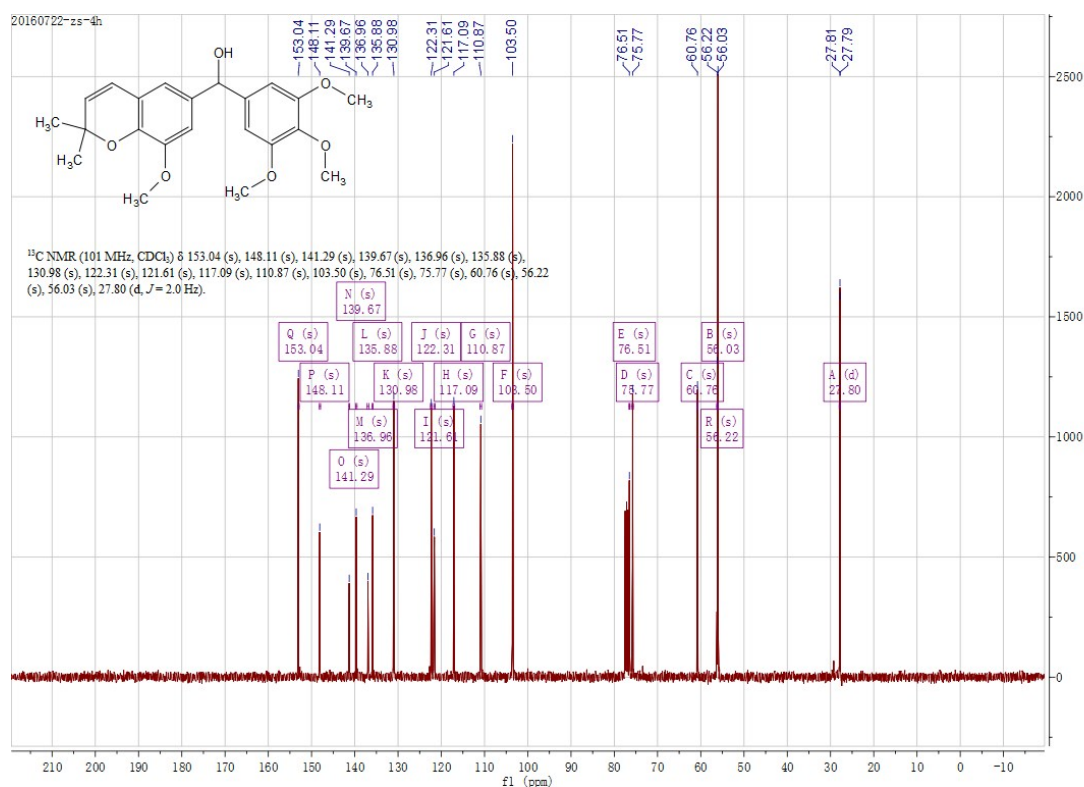

7a

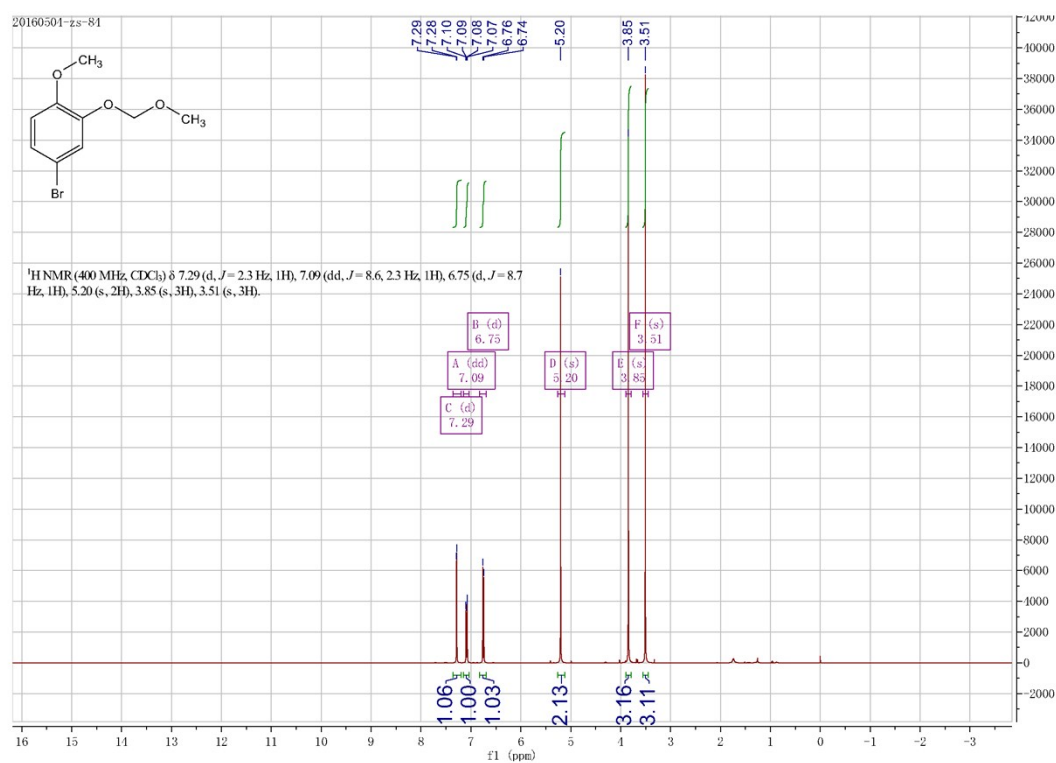

7b

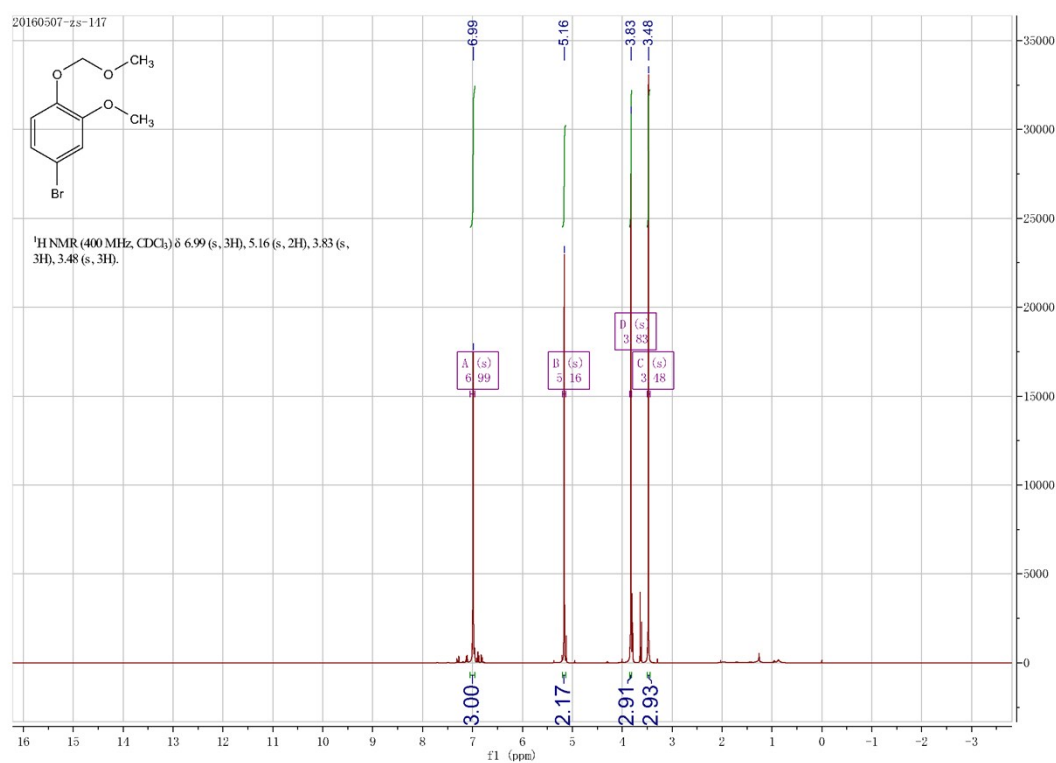

8a

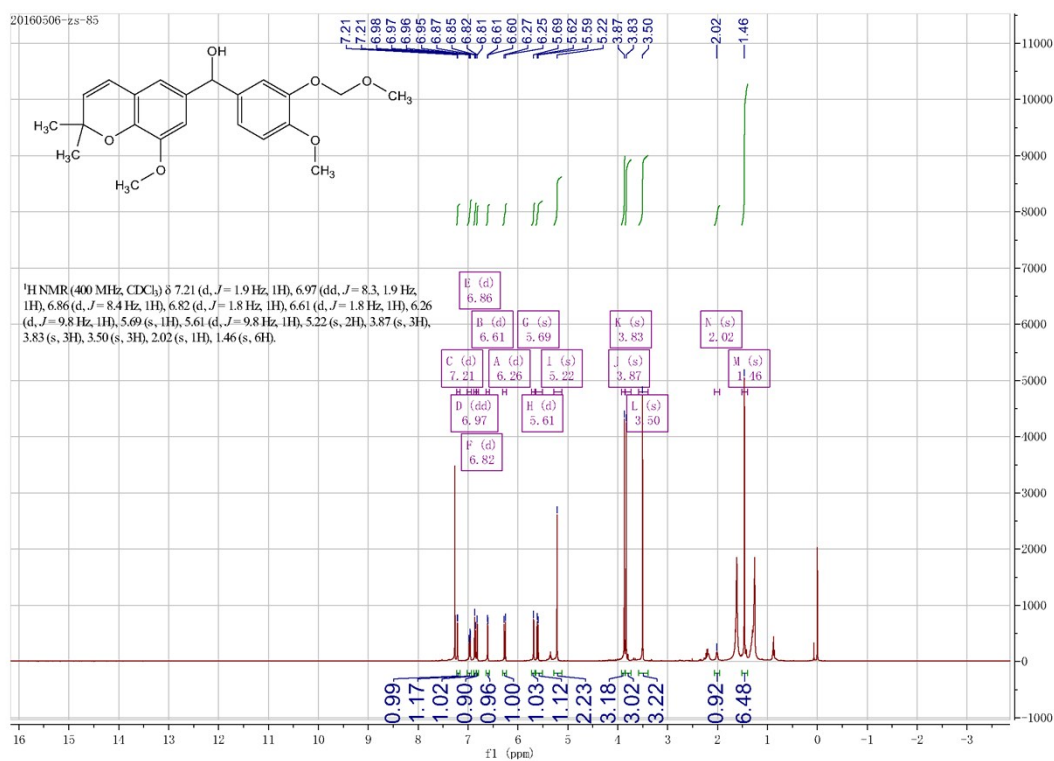

8b

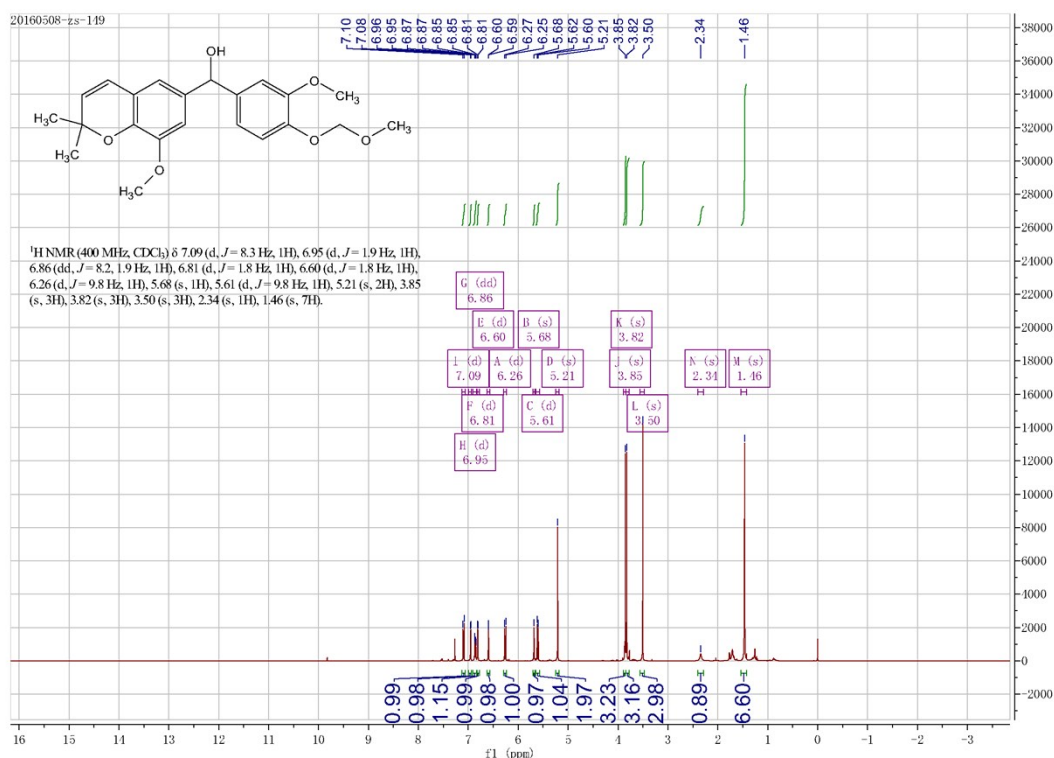

9a

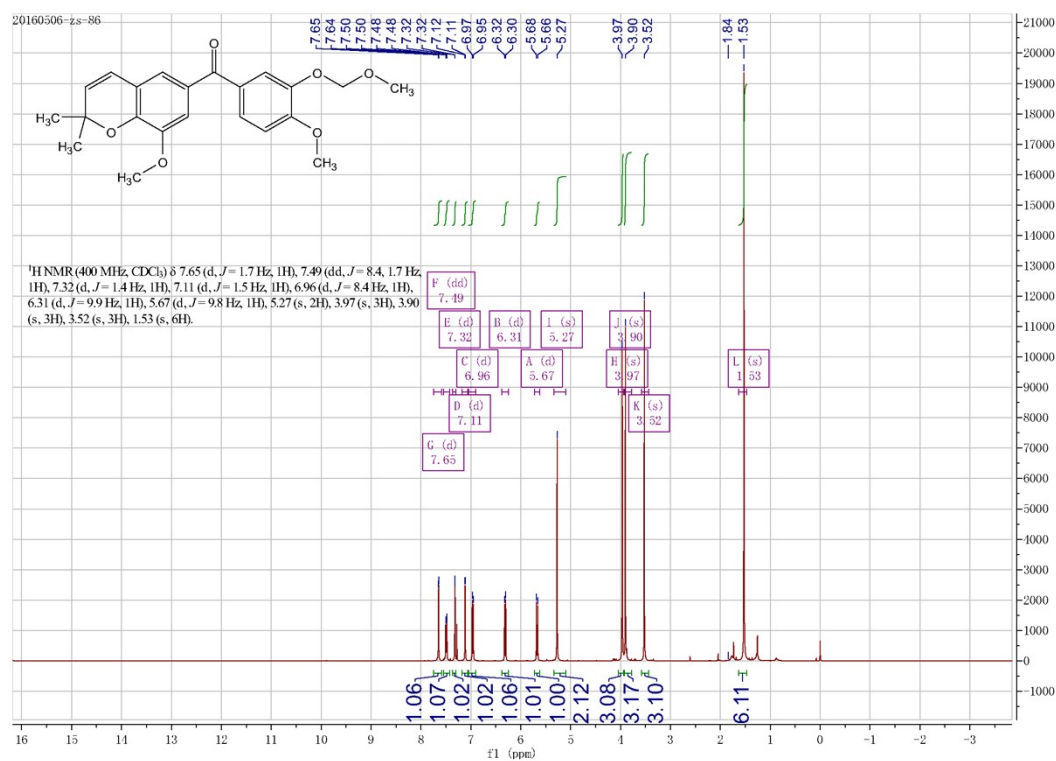

9b

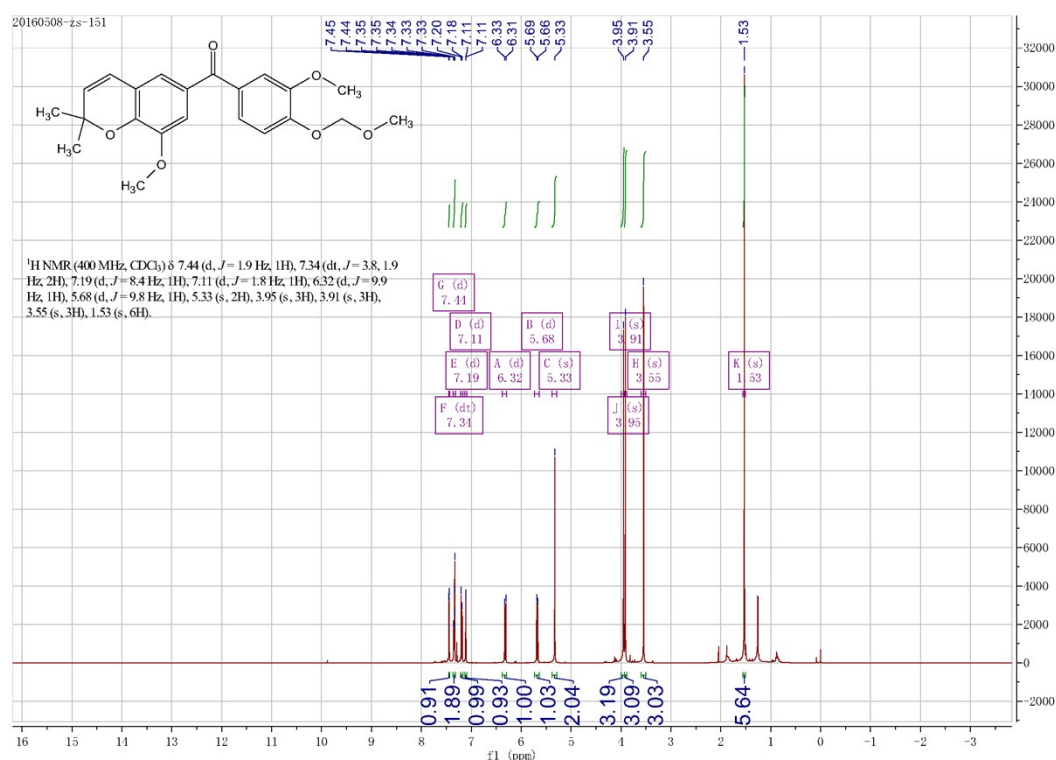

## SI4. HPLC chromatograms of target compounds

5a

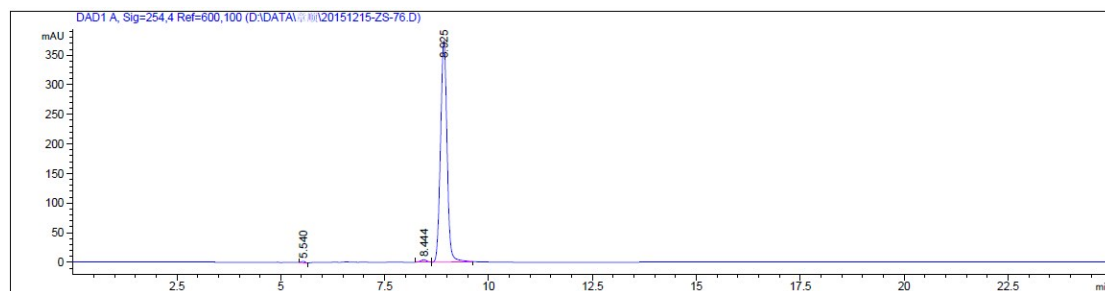

| 峰 # | 保留时间 [min] | 类型 | 峰宽 [min] | 峰面积 [mAU*s] | 峰高 [mAU]  | 峰面积 %   |
|-----|------------|----|----------|-------------|-----------|---------|
| 1   | 5.540      | BV | 0.0975   | 15.74513    | 2.57083   | 0.3796  |
| 2   | 8.444      | BV | 0.1583   | 41.80822    | 4.12309   | 1.0079  |
| 3   | 8.925      | VB | 0.1697   | 4090.62256  | 373.79340 | 98.6126 |

5b

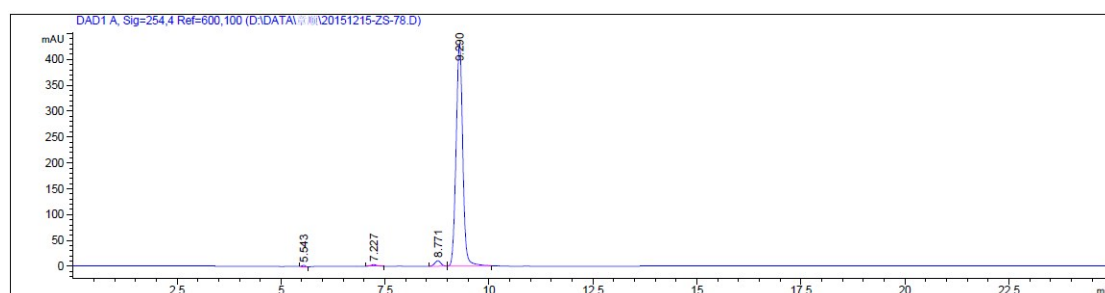

| 峰 # | 保留时间 [min] | 类型 | 峰宽 [min] | 峰面积 [mAU*s] | 峰高 [mAU]  | 峰面积 %   |
|-----|------------|----|----------|-------------|-----------|---------|
| 1   | 5.543      | BV | 0.0939   | 15.96751    | 2.66602   | 0.3223  |
| 2   | 7.227      | BB | 0.1518   | 32.21017    | 3.24606   | 0.6501  |
| 3   | 8.771      | BV | 0.1601   | 110.26850   | 10.70960  | 2.2254  |
| 4   | 9.290      | VB | 0.1723   | 4796.52930  | 429.47940 | 96.8023 |

5c

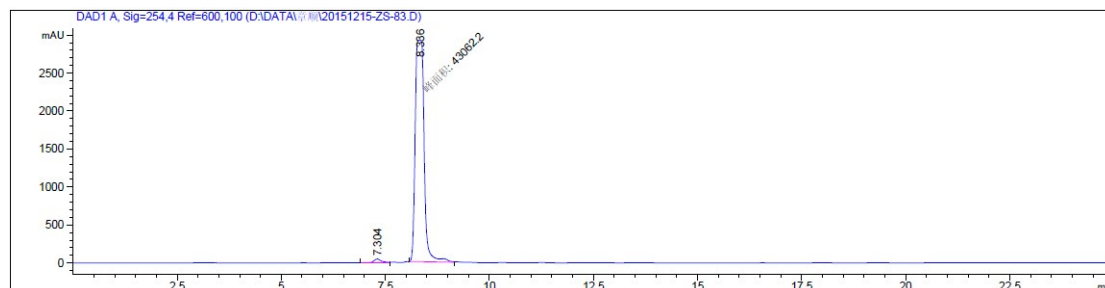

| 峰 # | 保留时间 [min] | 类型 | 峰宽 [min] | 峰面积 [mAU*s] | 峰高 [mAU]   | 峰面积 %   |
|-----|------------|----|----------|-------------|------------|---------|
| 1   | 7.304      | VV | 0.1972   | 681.65546   | 50.59747   | 1.5583  |
| 2   | 8.336      | MM | 0.2459   | 4.30622e4   | 2918.20850 | 98.4417 |

5d

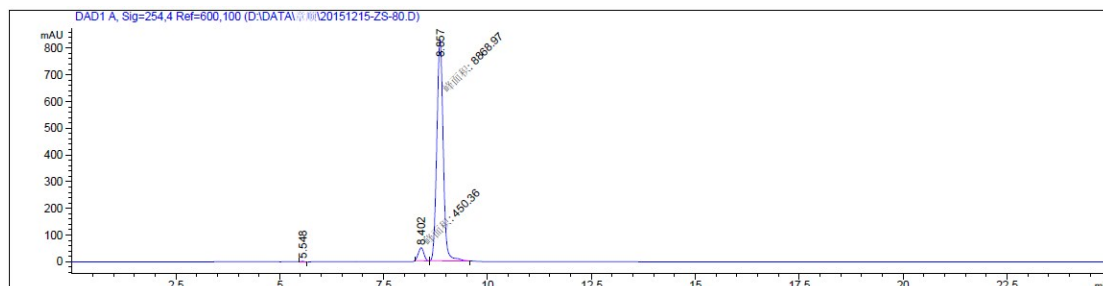

| 峰 # | 保留时间 [min] | 类型 | 峰宽 [min] | 峰面积 [mAU*s] | 峰高 [mAU]  | 峰面积 %   |
|-----|------------|----|----------|-------------|-----------|---------|
| 1   | 5.548      | BV | 0.0903   | 15.71390    | 2.68394   | 0.1683  |
| 2   | 8.402      | MM | 0.1537   | 450.36014   | 48.83542  | 4.8244  |
| 3   | 8.857      | MM | 0.1785   | 8868.97266  | 828.01196 | 95.0073 |

5e

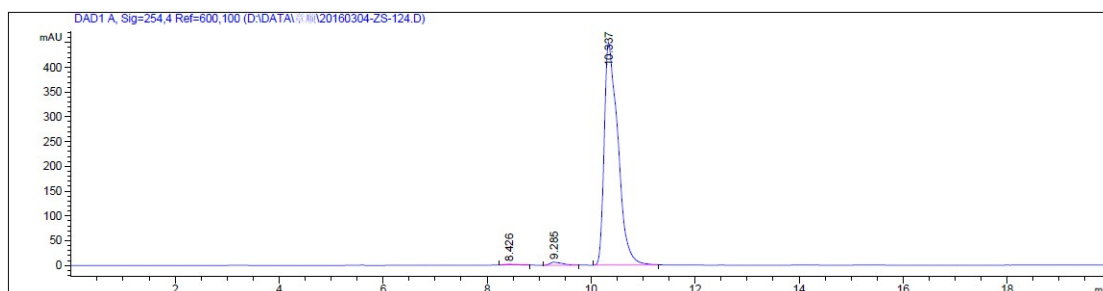

| 峰 # | 保留时间 [min] | 类型 | 峰宽 [min] | 峰面积 [mAU*s] | 峰高 [mAU]  | 峰面积 %   |
|-----|------------|----|----------|-------------|-----------|---------|
| 1   | 8.426      | BB | 0.2175   | 30.49657    | 1.91793   | 0.3650  |
| 2   | 9.285      | BB | 0.2288   | 101.01812   | 6.11150   | 1.2092  |
| 3   | 10.337     | BB | 0.2514   | 8222.62598  | 449.47678 | 98.4258 |

5f

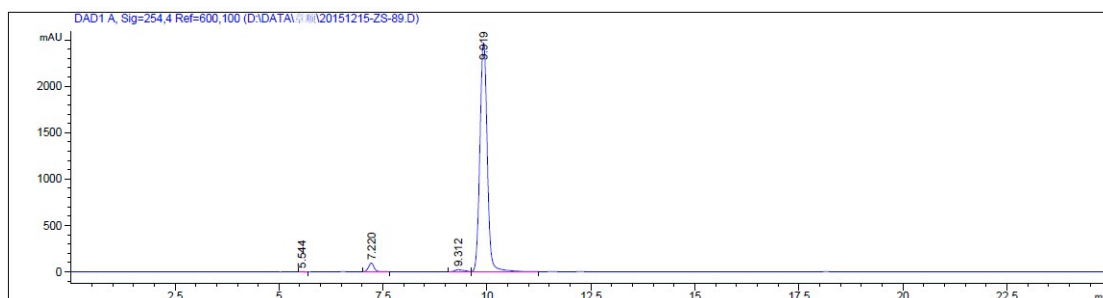

| 峰<br># | 保留时间<br>[min] | 类型 | 峰宽<br>[min] | 峰面积<br>[mAU*s] | 峰高<br>[mAU] | 峰面积<br>% |
|--------|---------------|----|-------------|----------------|-------------|----------|
| 1      | 5.544         | BB | 0.0821      | 30.13395       | 5.48157     | 0.0947   |
| 2      | 7.220         | BB | 0.1431      | 874.80896      | 93.51264    | 2.7493   |
| 3      | 9.312         | BV | 0.2183      | 362.07480      | 23.68715    | 1.1379   |
| 4      | 9.919         | VB | 0.1924      | 3.05517e4      | 2468.21704  | 96.0180  |

5g

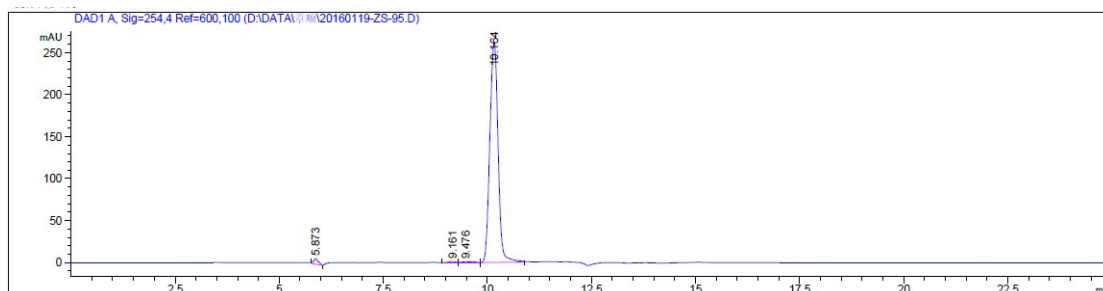

| 峰<br># | 保留时间<br>[min] | 类型 | 峰宽<br>[min] | 峰面积<br>[mAU*s] | 峰高<br>[mAU] | 峰面积<br>% |
|--------|---------------|----|-------------|----------------|-------------|----------|
| 1      | 5.873         | BV | 0.1123      | 51.53109       | 6.37678     | 1.3986   |
| 2      | 9.161         | BV | 0.1911      | 14.41676       | 1.20895     | 0.3913   |
| 3      | 9.476         | VV | 0.3033      | 23.73493       | 1.05976     | 0.6442   |
| 4      | 10.164        | VB | 0.2201      | 3594.84668     | 262.02167   | 97.5660  |

5h

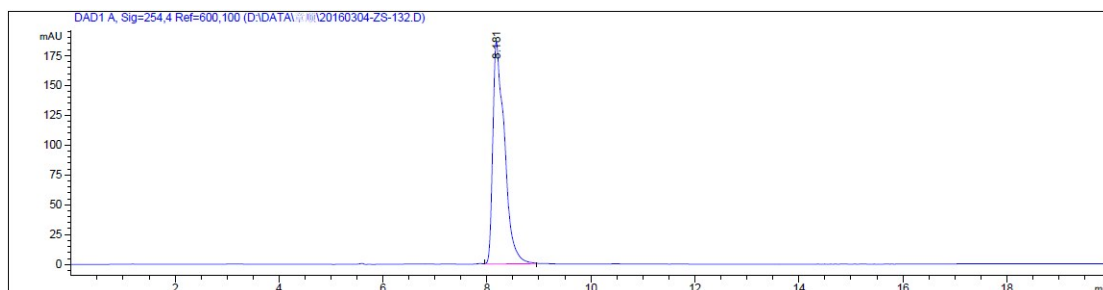

| 峰<br># | 保留时间<br>[min] | 类型 | 峰宽<br>[min] | 峰面积<br>[mAU*s] | 峰高<br>[mAU] | 峰面积<br>% |
|--------|---------------|----|-------------|----------------|-------------|----------|
| 1      | 8.181         | BB | 0.2138      | 2906.07471     | 186.52052   | 100.0000 |

10a

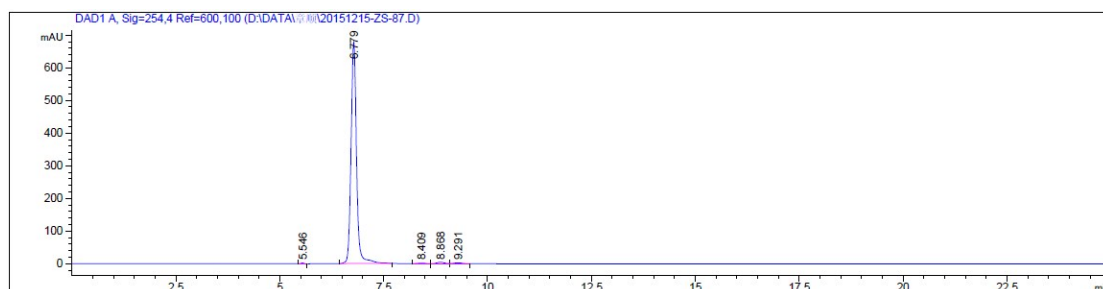

| 峰 # | 保留时间 [min] | 类型 | 峰宽 [min] | 峰面积 [mAU*s] | 峰高 [mAU]  | 峰面积 %   |
|-----|------------|----|----------|-------------|-----------|---------|
| 1   | 5.546      | BV | 0.0906   | 16.03418    | 2.72853   | 0.2531  |
| 2   | 6.779      | BB | 0.1389   | 6219.03418  | 679.02905 | 98.1823 |
| 3   | 8.409      | BV | 0.1917   | 16.36669    | 1.34712   | 0.2584  |
| 4   | 8.868      | VV | 0.1700   | 50.14239    | 4.49978   | 0.7916  |
| 5   | 9.291      | VB | 0.1918   | 32.59187    | 2.50542   | 0.5145  |

10b

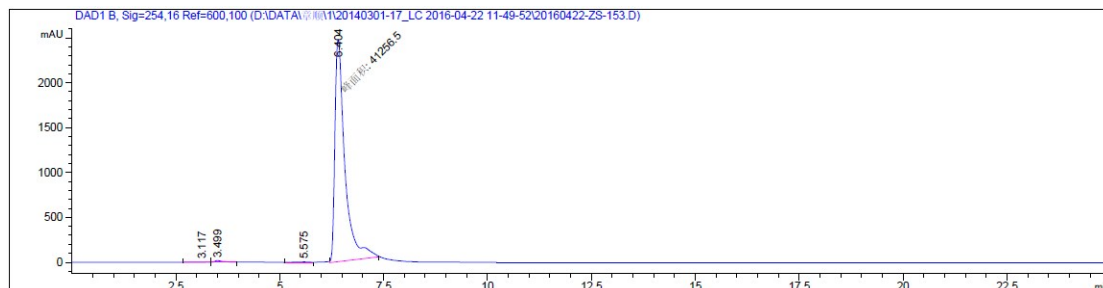

| 峰 # | 保留时间 [min] | 类型 | 峰宽 [min] | 峰面积 [mAU*s] | 峰高 [mAU]   | 峰面积 %   |
|-----|------------|----|----------|-------------|------------|---------|
| 1   | 3.117      | BV | 0.1272   | 30.20098    | 3.16855    | 0.0725  |
| 2   | 3.499      | VB | 0.1867   | 231.96599   | 17.72483   | 0.5568  |
| 3   | 5.575      | BV | 0.2751   | 140.16789   | 6.46084    | 0.3365  |
| 4   | 6.404      | MM | 0.2777   | 4.12565e4   | 2475.90112 | 99.0342 |

11

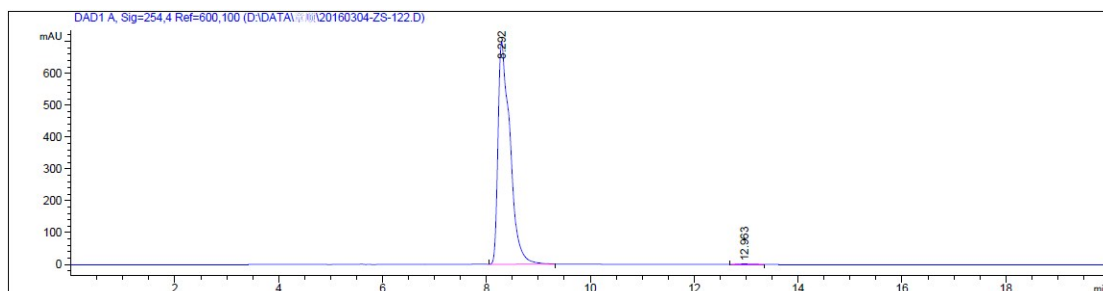

| 峰 # | 保留时间 [min] | 类型 | 峰宽 [min] | 峰面积 [mAU*s] | 峰高 [mAU]  | 峰面积 %   |
|-----|------------|----|----------|-------------|-----------|---------|
| 1   | 8.292      | BB | 0.2212   | 1.12037e4   | 698.16962 | 99.7690 |
| 2   | 12.963     | BB | 0.2616   | 25.93790    | 1.47176   | 0.2310  |

12

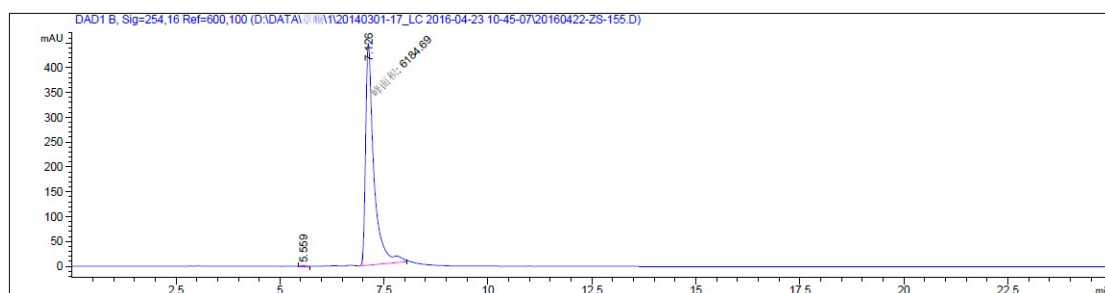

| 峰 # | 保留时间 [min] | 类型 | 峰宽 [min] | 峰面积 [mAU*s] | 峰高 [mAU]  | 峰面积 %   |
|-----|------------|----|----------|-------------|-----------|---------|
| 1   | 5.559      | BB | 0.0922   | 8.34995     | 1.42908   | 0.1348  |
| 2   | 7.126      | MM | 0.2305   | 6184.69385  | 447.12988 | 99.8652 |

## SI5. HR-MS of target compounds and some of intermediate compounds

### 5a

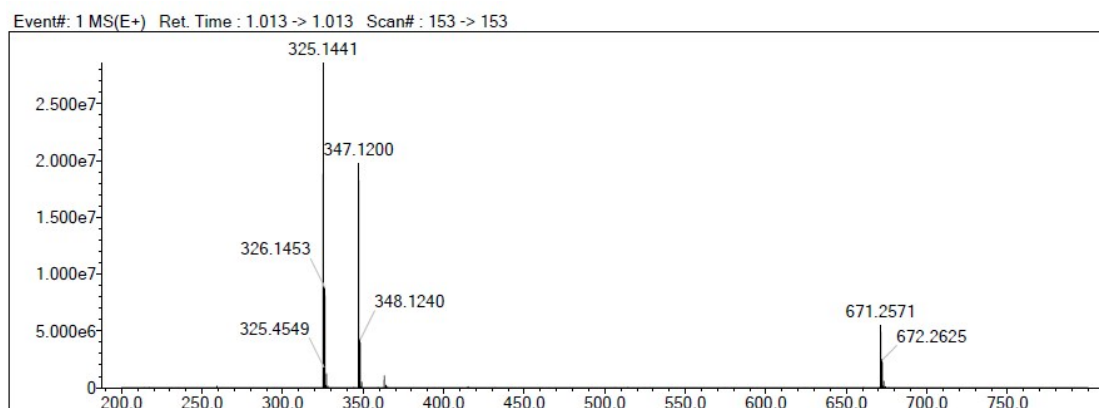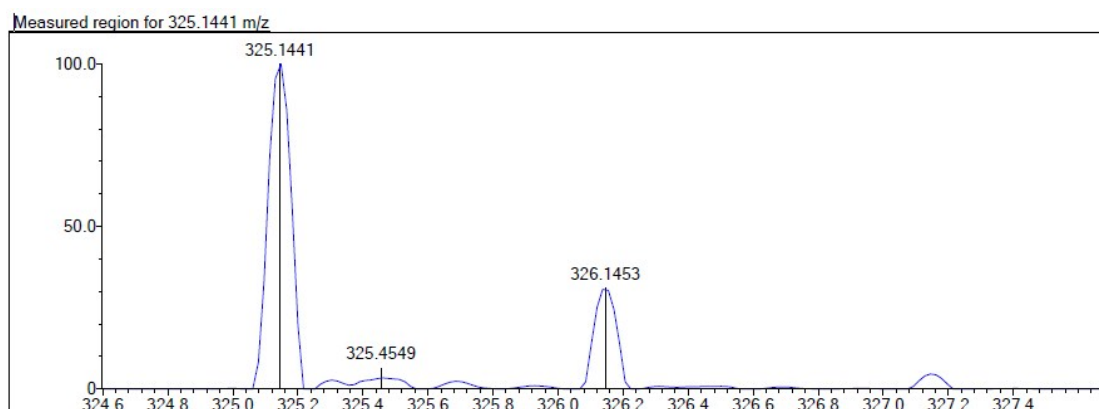

| Rank | Score | Formula (M) | Ion                | Meas. m/z | Pred. m/z | Df. (mDa) | Df. (ppm) | Iso   | DBE  |
|------|-------|-------------|--------------------|-----------|-----------|-----------|-----------|-------|------|
| 2    | 58.24 | C20 H20 O4  | [M+H] <sup>+</sup> | 325.1441  | 325.1434  | 0.7       | 2.15      | 59.97 | 11.0 |

### 5b

Event#: 1 MS(E+) Ret. Time : 1.080 -> 1.080 Scan#: 163 -> 163

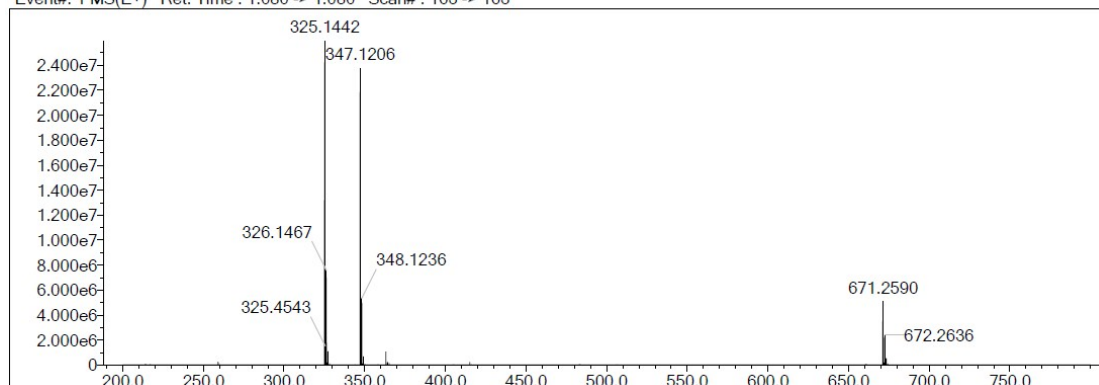

Measured region for 325.1442 m/z

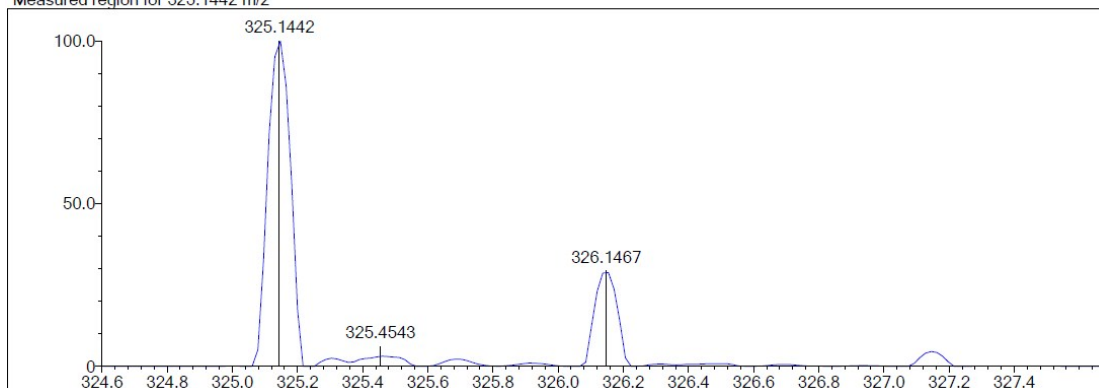

| Rank | Score | Formula (M) | Ion                | Meas. m/z | Pred. m/z | Df. (mDa) | Df. (ppm) | Iso   | DBE  |
|------|-------|-------------|--------------------|-----------|-----------|-----------|-----------|-------|------|
| 2    | 61.80 | C20 H20 O4  | [M+H] <sup>+</sup> | 325.1442  | 325.1434  | 0.8       | 2.46      | 64.14 | 11.0 |

5c

Event#: 1 MS(E+) Ret. Time : 0.893 -> 0.893 Scan#: 135 -> 135

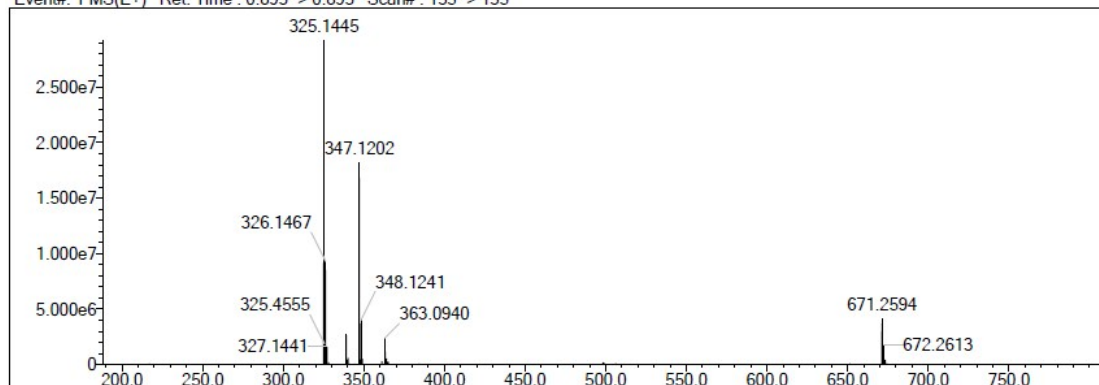

Measured region for 325.1445 m/z

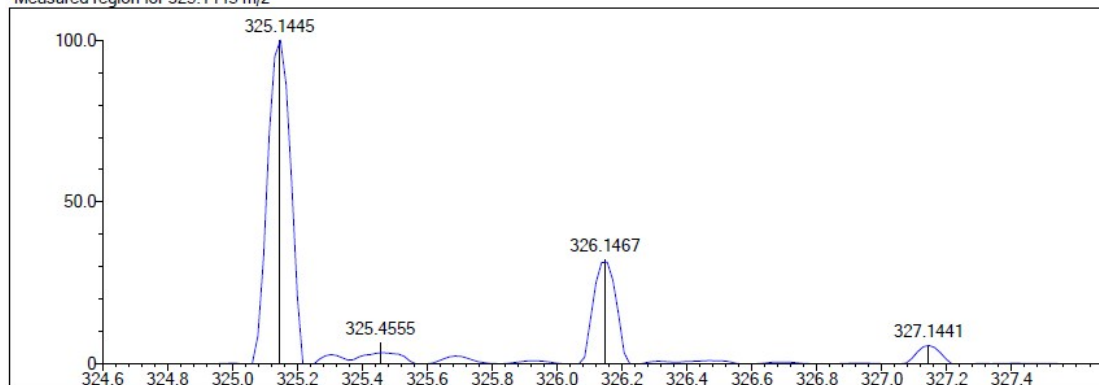

| Rank | Score | Formula (M) | Ion                | Meas. m/z | Pred. m/z | Df. (mDa) | Df. (ppm) | Iso   | DBE  |
|------|-------|-------------|--------------------|-----------|-----------|-----------|-----------|-------|------|
| 2    | 49.62 | C20 H20 O4  | [M+H] <sup>+</sup> | 325.1445  | 325.1434  | 1.1       | 3.38      | 52.76 | 11.0 |

## 5d

Event#: 1 MS(E+) Ret. Time : 0.973 -> 0.973 Scan#: 147 -> 147

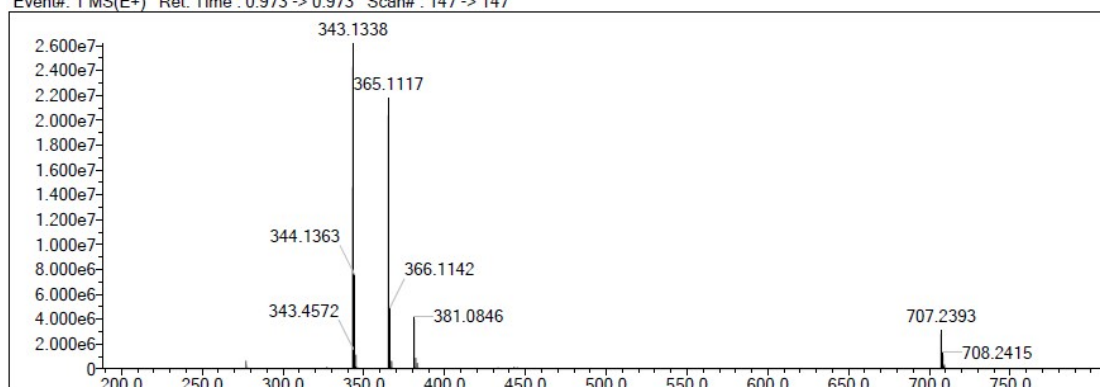

Measured region for 343.1338 m/z

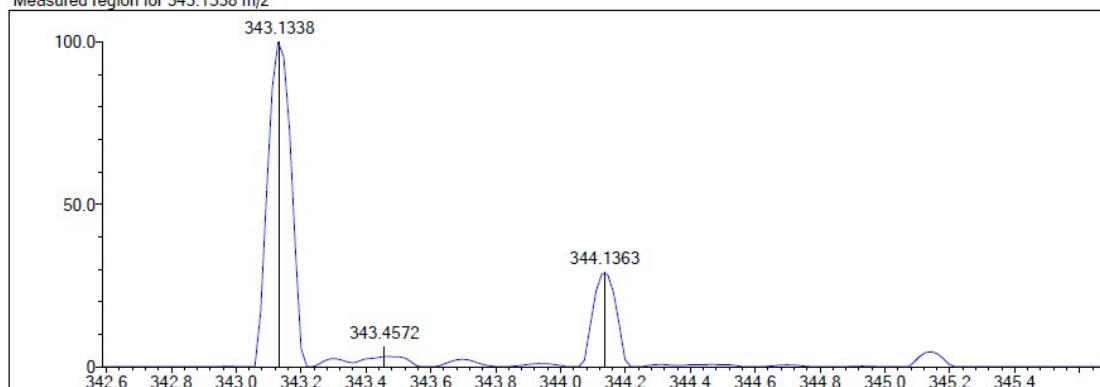

| Rank | Score | Formula (M)  | Ion                | Meas. m/z | Pred. m/z | Df. (mDa) | Df. (ppm) | Iso   | DBE  |
|------|-------|--------------|--------------------|-----------|-----------|-----------|-----------|-------|------|
| 2    | 74.47 | C20 H19 O4 F | [M+H] <sup>+</sup> | 343.1338  | 343.1340  | -0.2      | -0.58     | 74.47 | 11.0 |

## 5e

Event#: 1 MS(E+) Ret. Time : 1.133 -> 1.133 Scan#: 171 -> 171

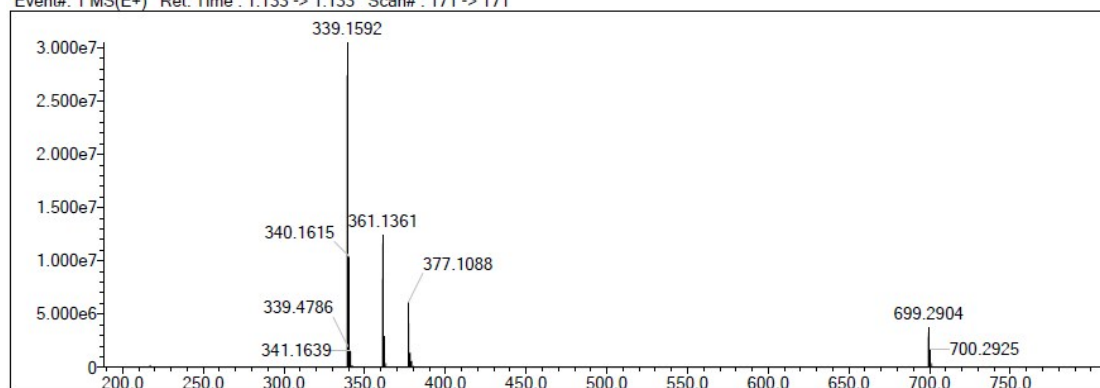

Measured region for 339.1592 m/z

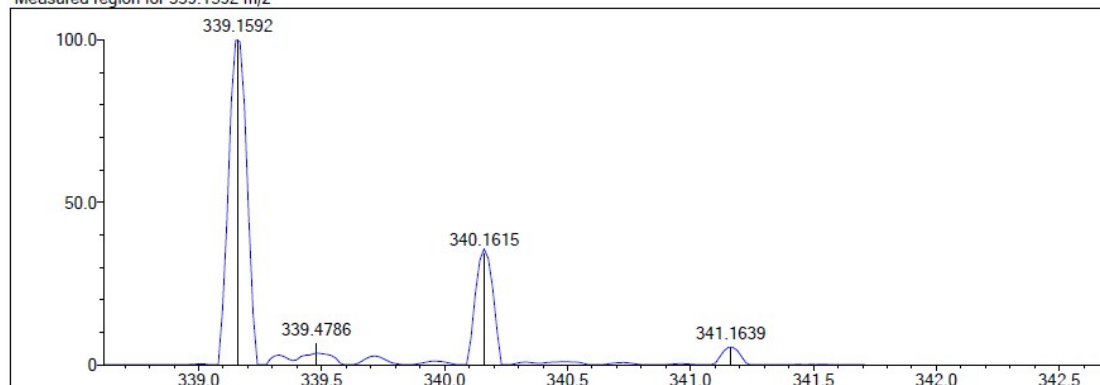

| Rank | Score | Formula (M)                                    | Ion                | Meas. m/z | Pred. m/z | Df. (mDa) | Df. (ppm) | Iso   | DBE  |
|------|-------|------------------------------------------------|--------------------|-----------|-----------|-----------|-----------|-------|------|
| 1    | 60.69 | C <sub>21</sub> H <sub>22</sub> O <sub>4</sub> | [M+H] <sup>+</sup> | 339.1592  | 339.1591  | 0.1       | 0.29      | 60.69 | 11.0 |

5f

Event#: 1 MS(E+) Ret. Time : 1.107 -> 1.107 Scan#: 167 -> 167

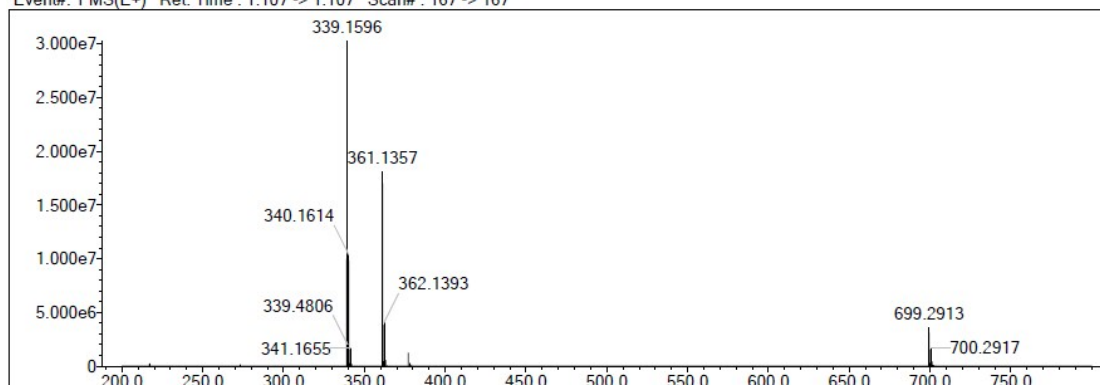

Measured region for 339.1596 m/z

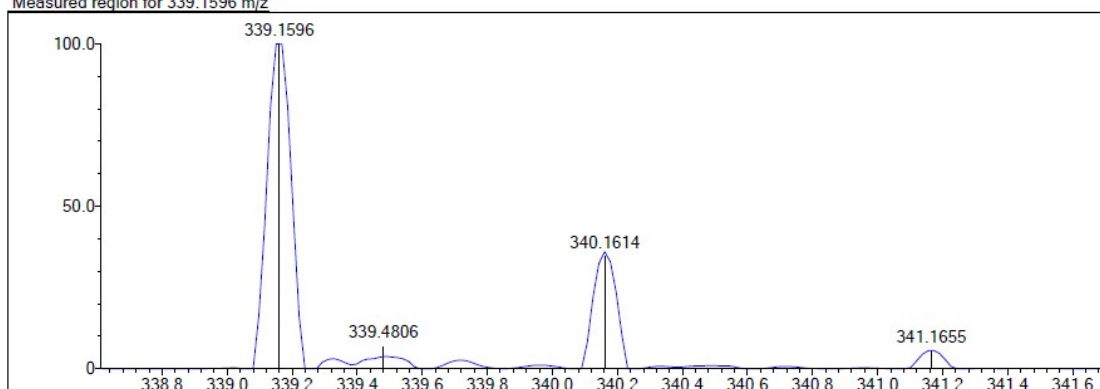

| Rank | Score | Formula (M)                                    | Ion                | Meas. m/z | Pred. m/z | Df. (mDa) | Df. (ppm) | Iso   | DBE  |
|------|-------|------------------------------------------------|--------------------|-----------|-----------|-----------|-----------|-------|------|
| 2    | 59.79 | C <sub>21</sub> H <sub>22</sub> O <sub>4</sub> | [M+H] <sup>+</sup> | 339.1596  | 339.1591  | 0.5       | 1.47      | 60.50 | 11.0 |

5g

Event#: 1 MS(E+) Ret. Time : 1.227 -> 1.227 Scan#: 185 -> 185

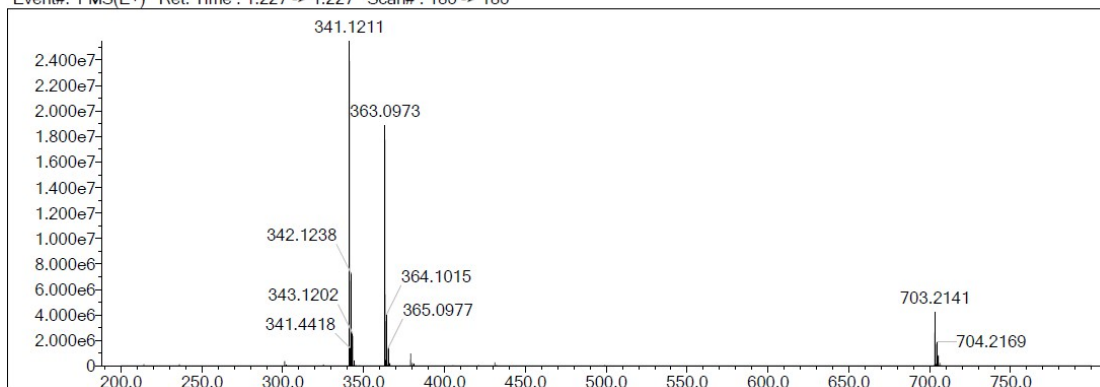

Measured region for 341.1211 m/z

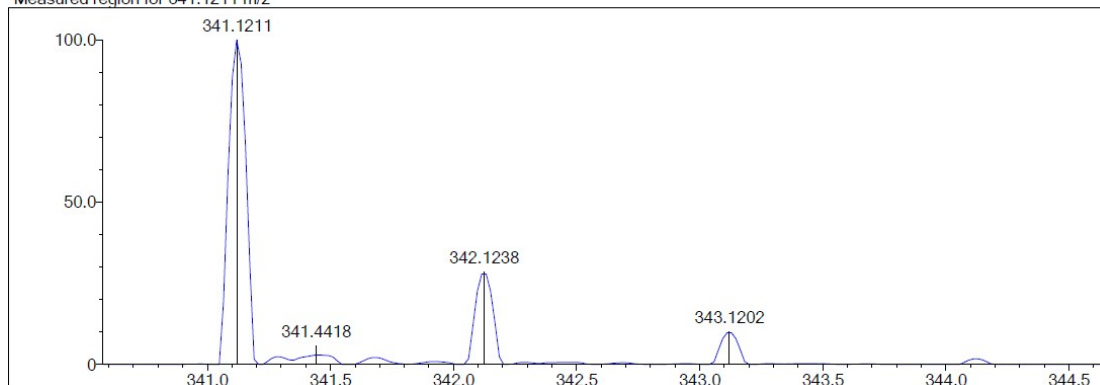

| Rank | Score | Formula (M)  | Ion                | Meas. m/z | Pred. m/z | Df. (mDa) | Df. (ppm) | Iso   | DBE  |
|------|-------|--------------|--------------------|-----------|-----------|-----------|-----------|-------|------|
| 1    | 82.95 | C20 H20 O3 S | [M+H] <sup>+</sup> | 341.1211  | 341.1206  | 0.5       | 1.47      | 83.94 | 11.0 |

5h

Event#: 1 MS(E<sup>+</sup>) Ret. Time : 0.947 -> 0.947 Scan#: 143 -> 143

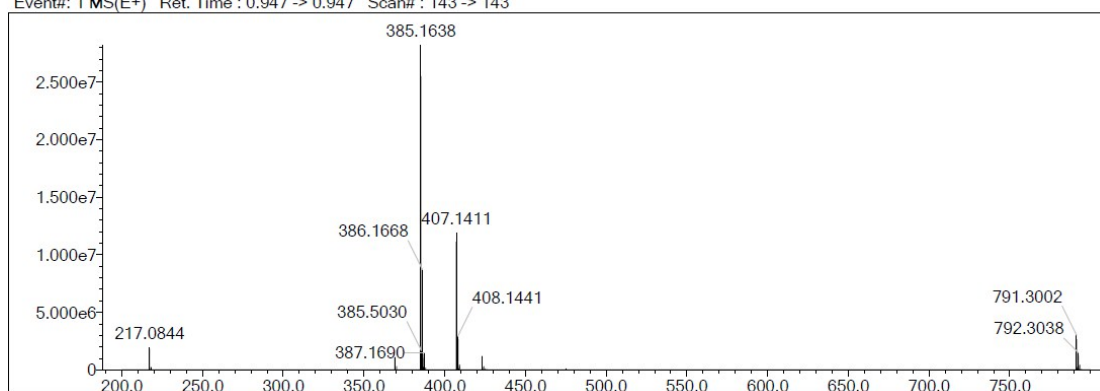

Measured region for 385.1638 m/z

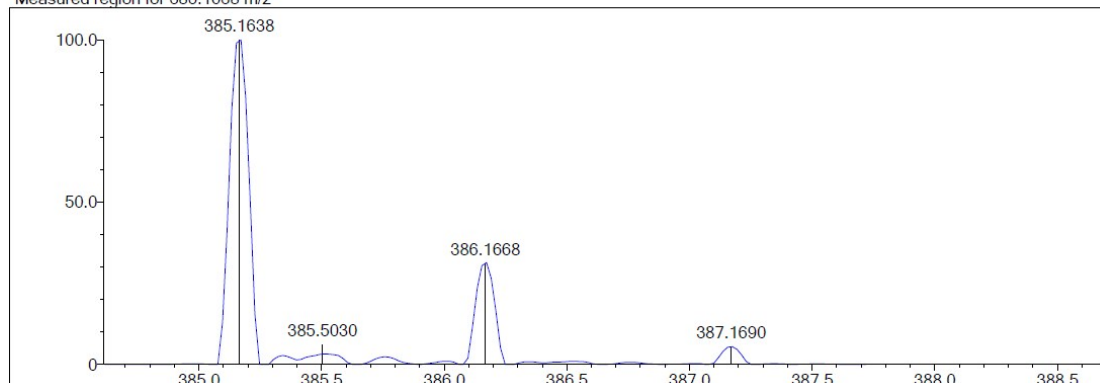

| Rank | Score | Formula (M) | Ion                | Meas. m/z | Pred. m/z | Df. (mDa) | Df. (ppm) | Iso   | DBE  |
|------|-------|-------------|--------------------|-----------|-----------|-----------|-----------|-------|------|
| 4    | 71.49 | C22 H24 O6  | [M+H] <sup>+</sup> | 385.1638  | 385.1646  | -0.8      | -2.08     | 73.47 | 11.0 |

10a

Event#: 1 MS(E+) Ret. Time : 0.827 -> 0.827 Scan#: 125 -> 125

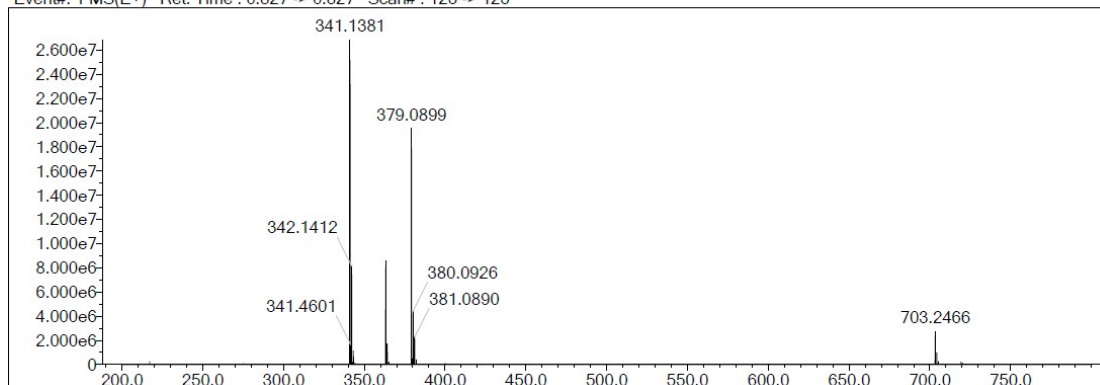

Event#: 1 MS(E+) Ret. Time : 0.827 -> 0.827 Scan#: 125 -> 125

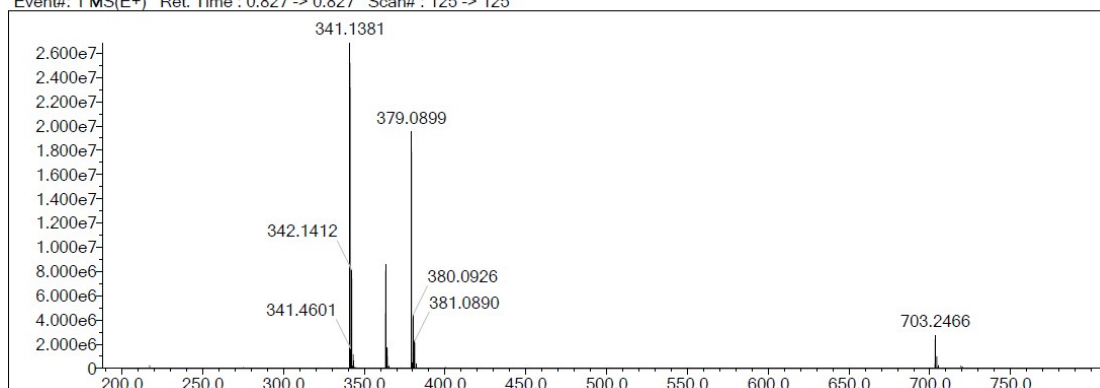

| Rank | Score | Formula (M) | Ion                | Meas. m/z | Pred. m/z | Df. (mDa) | Df. (ppm) | Iso   | DBE  |
|------|-------|-------------|--------------------|-----------|-----------|-----------|-----------|-------|------|
| 1    | 69.04 | C20 H20 O5  | [M+H] <sup>+</sup> | 341.1381  | 341.1384  | -0.3      | -0.88     | 69.04 | 11.0 |

## 10b

Event#: 1 MS(E+) Ret. Time : 0.867 -> 0.867 Scan#: 131 -> 131

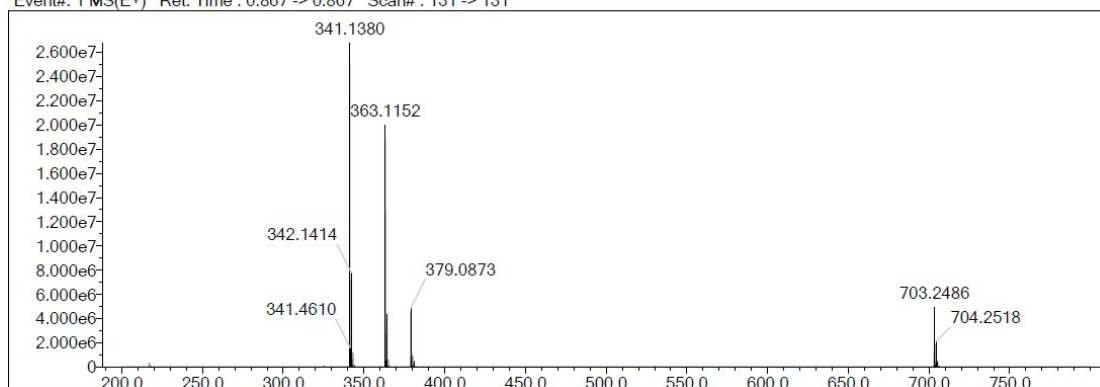

Measured region for 341.1380 m/z

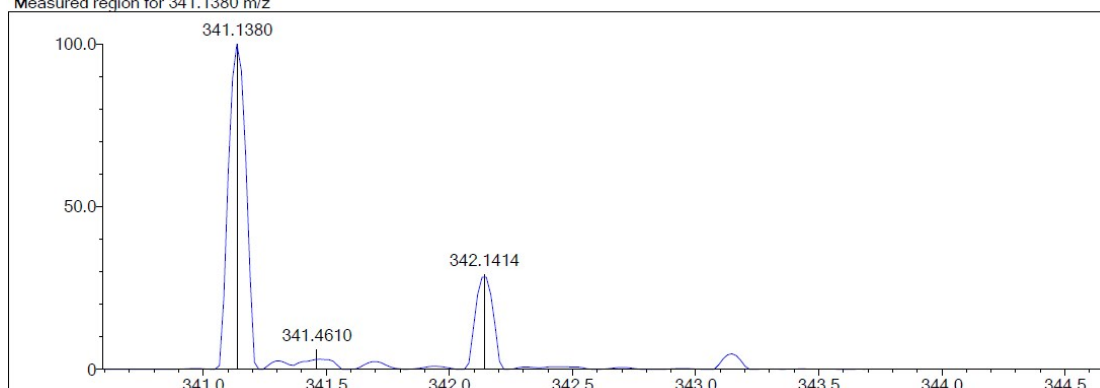

| Rank | Score | Formula (M) | Ion                | Meas. m/z | Pred. m/z | Df. (mDa) | Df. (ppm) | Iso   | DBE  |
|------|-------|-------------|--------------------|-----------|-----------|-----------|-----------|-------|------|
| 2    | 72.09 | C20 H20 O5  | [M+H] <sup>+</sup> | 341.1380  | 341.1384  | -0.4      | -1.17     | 72.40 | 11.0 |

## 11

Event#: 1 MS(E+) Ret. Time : 1.013 -&gt; 1.013 Scan#: 153 -&gt; 153

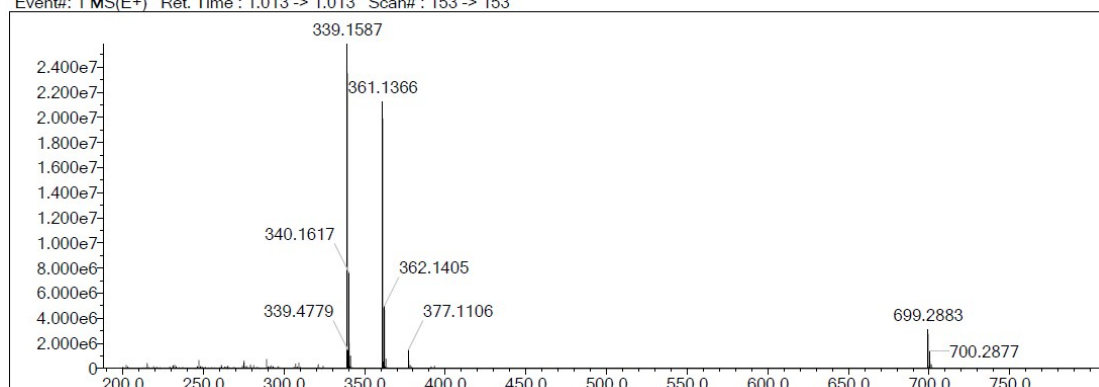

Measured region for 339.1587 m/z

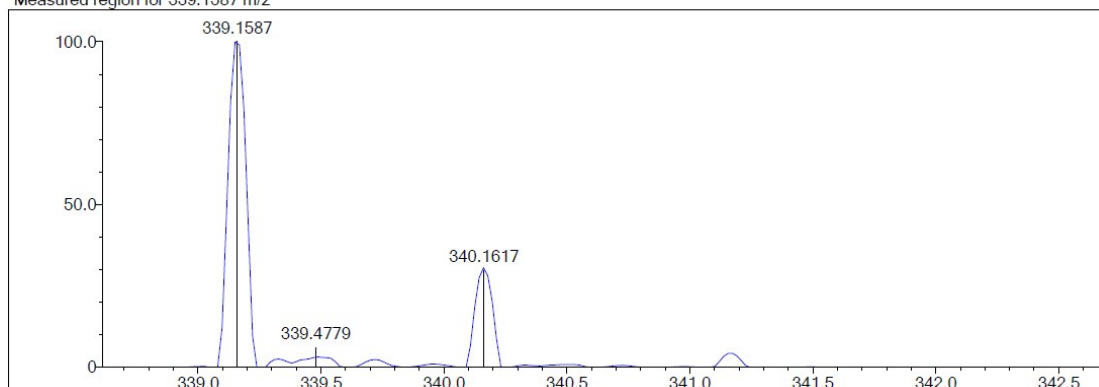

| Rank | Score | Formula (M)                                    | Ion                | Meas. m/z | Pred. m/z | Df. (mDa) | Df. (ppm) | Iso   | DBE  |
|------|-------|------------------------------------------------|--------------------|-----------|-----------|-----------|-----------|-------|------|
| 1    | 76.86 | C <sub>21</sub> H <sub>22</sub> O <sub>4</sub> | [M+H] <sup>+</sup> | 339.1587  | 339.1591  | -0.4      | -1.18     | 77.21 | 11.0 |

## 12

Event#: 1 MS(E+) Ret. Time : 0.947 -&gt; 0.947 Scan#: 143 -&gt; 143

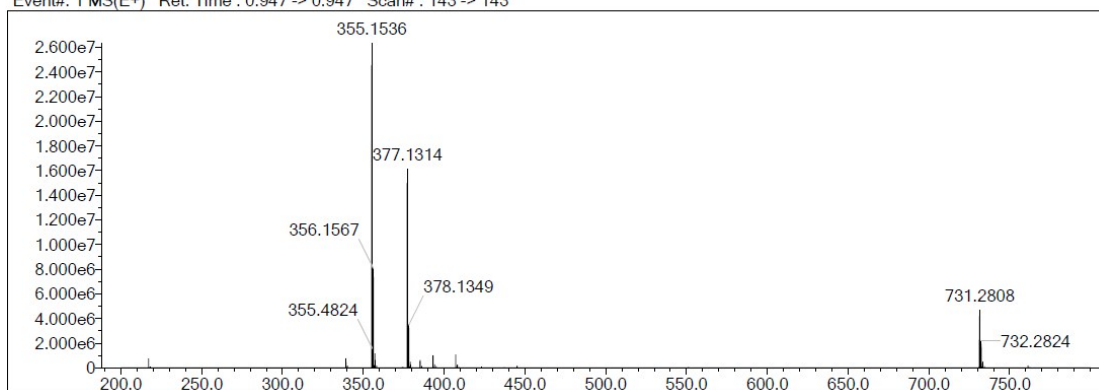

Measured region for 355.1536 m/z

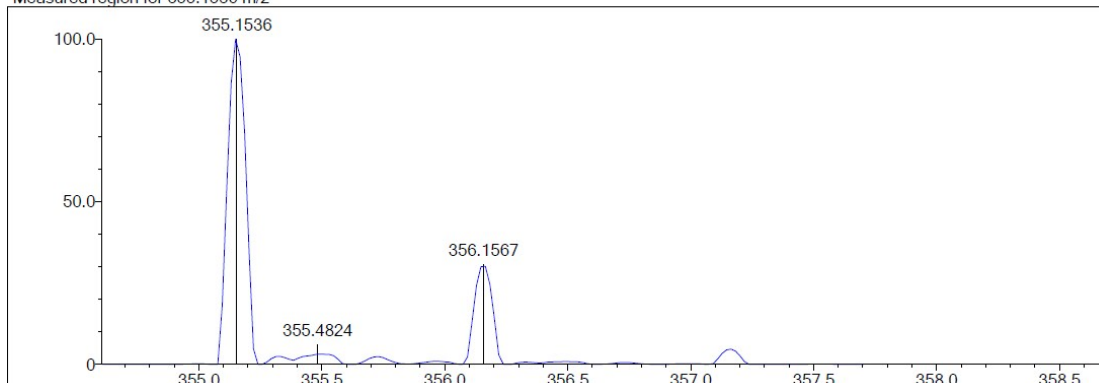

| Rank | Score | Formula (M)                                    | Ion                | Meas. m/z | Pred. m/z | Df. (mDa) | Df. (ppm) | Iso   | DBE  |
|------|-------|------------------------------------------------|--------------------|-----------|-----------|-----------|-----------|-------|------|
| 1    | 71.62 | C <sub>21</sub> H <sub>22</sub> O <sub>5</sub> | [M+H] <sup>+</sup> | 355.1536  | 355.1540  | -0.4      | -1.13     | 71.86 | 11.0 |

#### 4a

Event#: 1 MS(E+) Ret. Time : 1.027 -> 1.027 Scan#: 155 -> 155

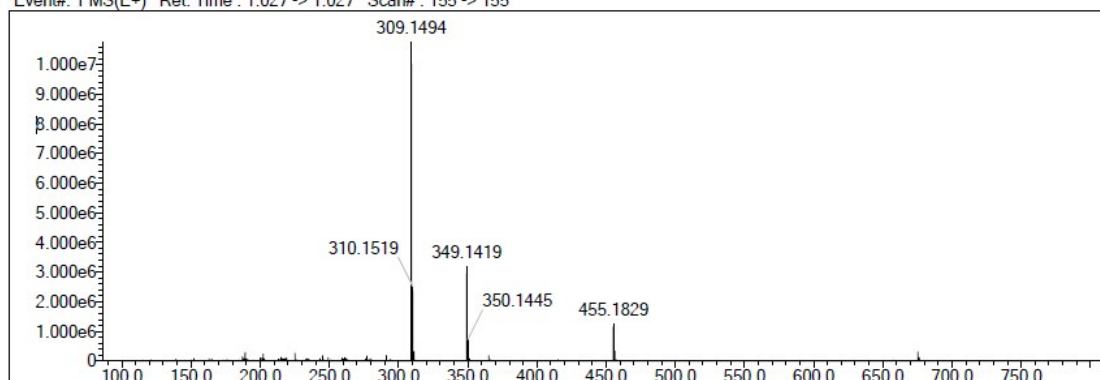

Measured region for 349.1419 m/z

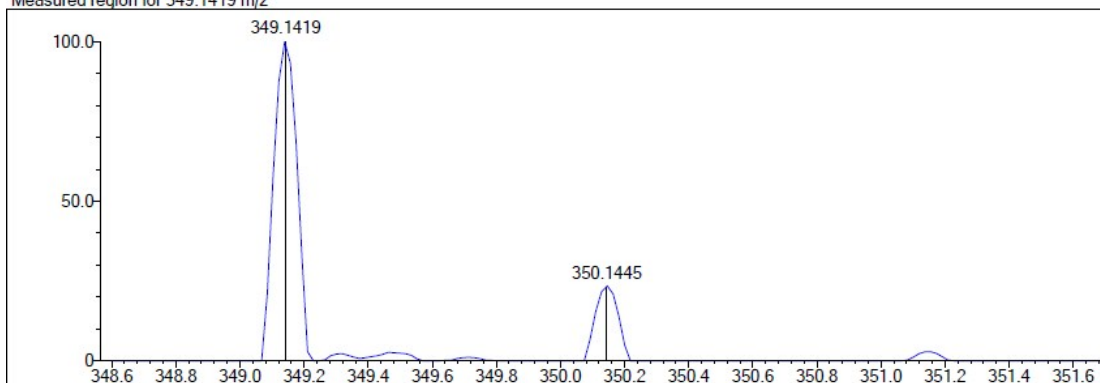

| Rank | Score | Formula (M)                                    | Ion                 | Meas. m/z | Pred. m/z | Df. (mDa) | Df. (ppm) | Iso   | DBE  |
|------|-------|------------------------------------------------|---------------------|-----------|-----------|-----------|-----------|-------|------|
| 1    | 85.32 | C <sub>20</sub> H <sub>22</sub> O <sub>4</sub> | [M+Na] <sup>+</sup> | 349.1419  | 349.1410  | 0.9       | 2.58      | 88.83 | 10.0 |

#### 4b

Event#: 1 MS(E+) Ret. Time : 0.987 -> 0.987 Scan#: 149 -> 149

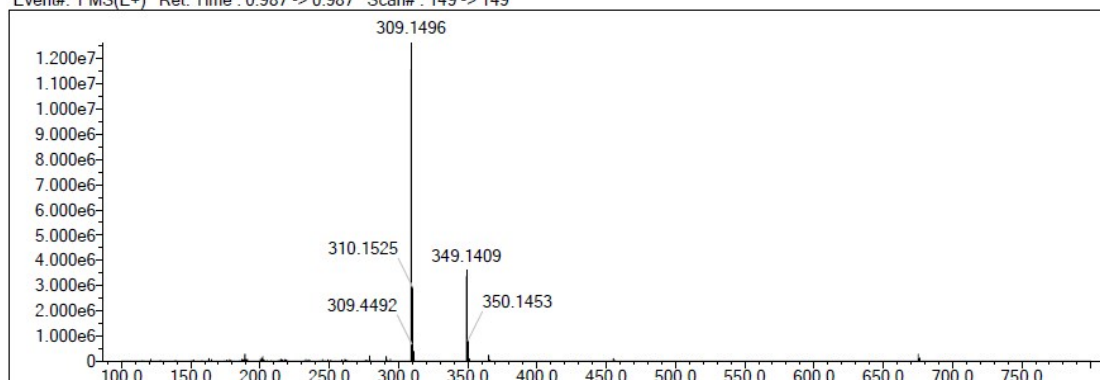

Measured region for 349.1409 m/z

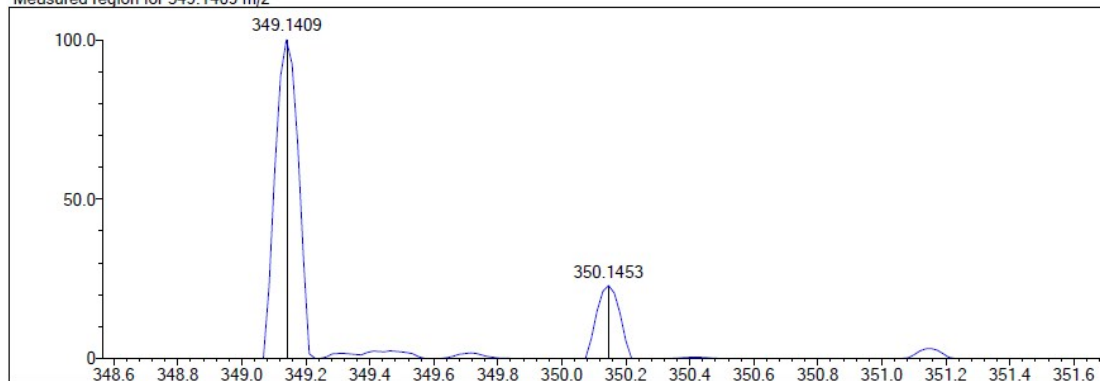

| Rank | Score | Formula (M)                                    | Ion                 | Meas. m/z | Pred. m/z | Df. (mDa) | Df. (ppm) | Iso   | DBE  |
|------|-------|------------------------------------------------|---------------------|-----------|-----------|-----------|-----------|-------|------|
| 1    | 88.52 | C <sub>20</sub> H <sub>22</sub> O <sub>4</sub> | [M+Na] <sup>+</sup> | 349.1409  | 349.1410  | -0.1      | -0.29     | 88.52 | 10.0 |

4c

Event#: 1 MS(E+) Ret. Time : 0.987 -> 0.987 Scan#: 149 -> 149

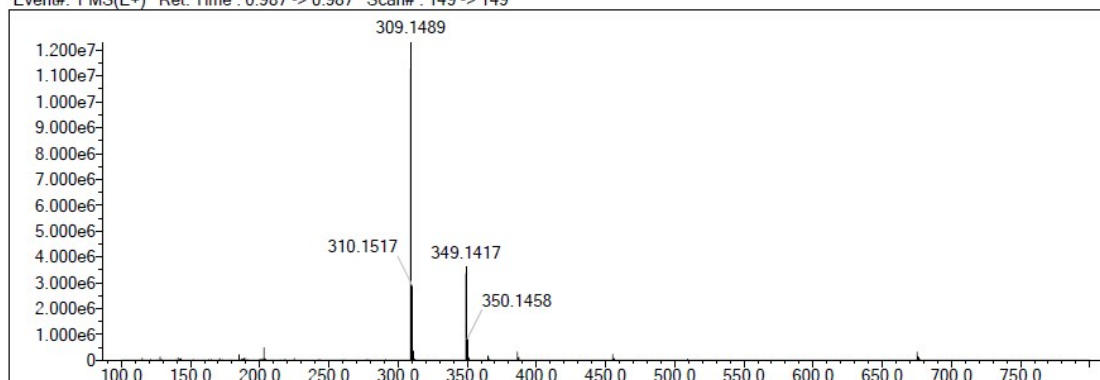

Measured region for 349.1417 m/z

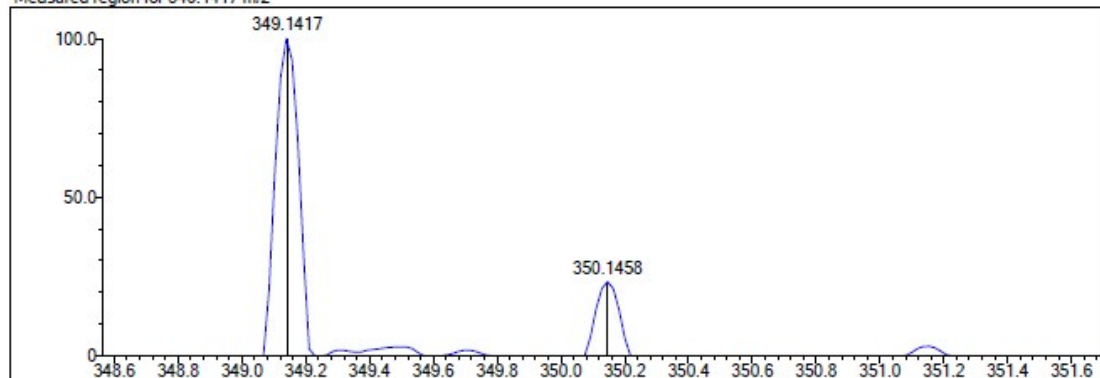

| Rank | Score | Formula (M)                                    | Ion                 | Meas. m/z | Pred. m/z | Df. (mDa) | Df. (ppm) | Iso   | DBE  |
|------|-------|------------------------------------------------|---------------------|-----------|-----------|-----------|-----------|-------|------|
| 1    | 85.88 | C <sub>20</sub> H <sub>22</sub> O <sub>4</sub> | [M+Na] <sup>+</sup> | 349.1417  | 349.1410  | 0.7       | 2.00      | 88.08 | 10.0 |

4d

Event#: 1 MS(E+) Ret. Time : 0.960 -> 0.960 Scan#: 145 -> 145

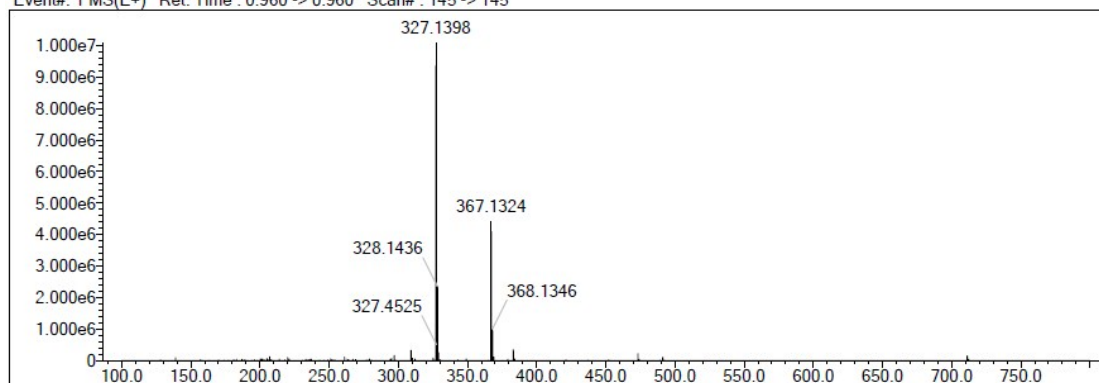

Measured region for 367.1324 m/z

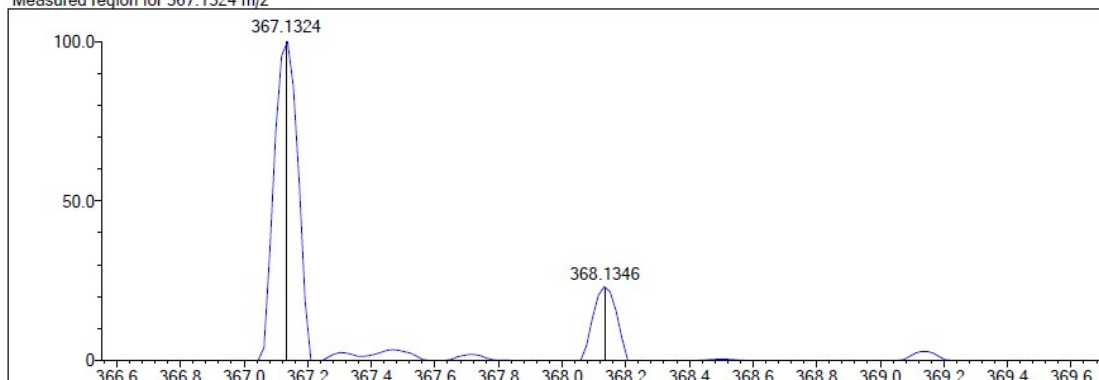

| Rank | Score | Formula (M)  | Ion                 | Meas. m/z | Pred. m/z | Df. (mDa) | Df. (ppm) | Iso   | DBE  |
|------|-------|--------------|---------------------|-----------|-----------|-----------|-----------|-------|------|
| 3    | 77.37 | C20 H21 O4 F | [M+Na] <sup>+</sup> | 367.1324  | 367.1316  | 0.8       | 2.18      | 79.72 | 10.0 |

4e

Event#: 1 MS(E+) Ret. Time : 1.040 -> 1.040 Scan#: 157 -> 157

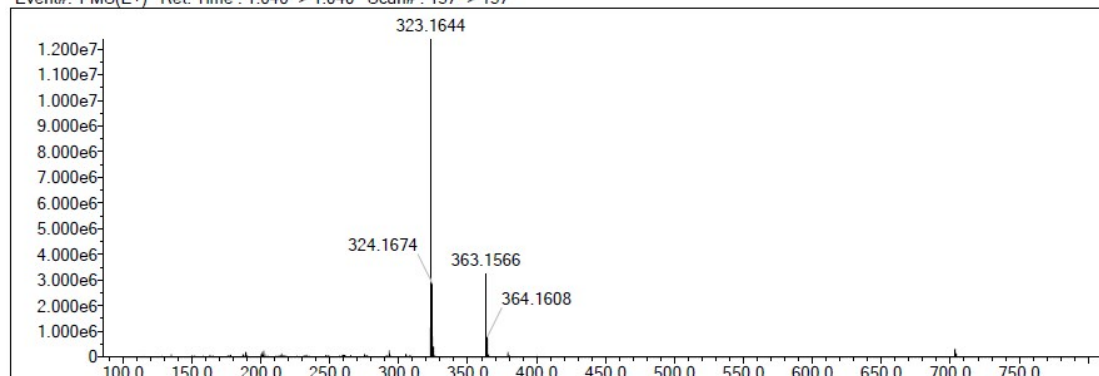

Measured region for 363.1566 m/z

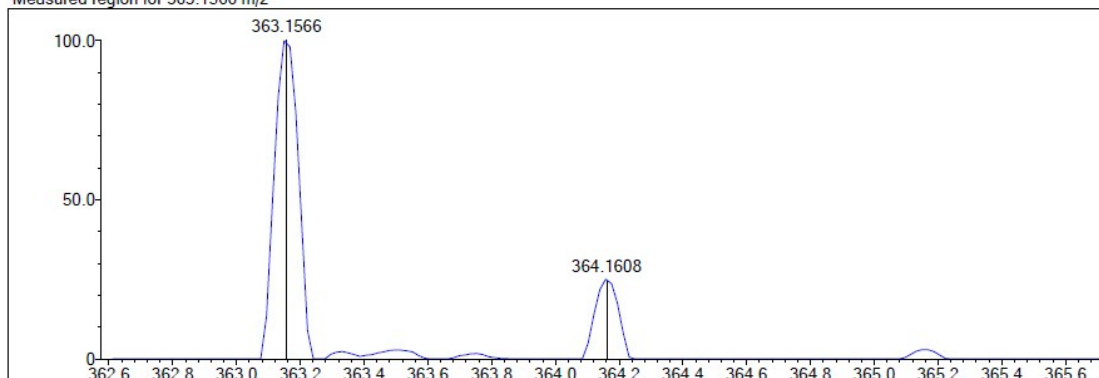

| Rank | Score | Formula (M) | Ion                 | Meas. m/z | Pred. m/z | Df. (mDa) | Df. (ppm) | Iso   | DBE  |
|------|-------|-------------|---------------------|-----------|-----------|-----------|-----------|-------|------|
| 1    | 85.60 | C21 H24 O4  | [M+Na] <sup>+</sup> | 363.1566  | 363.1567  | -0.1      | -0.28     | 85.60 | 10.0 |

4f

Event#: 1 MS(E+) Ret. Time : 1.027 -&gt; 1.027 Scan#: 155 -&gt; 155

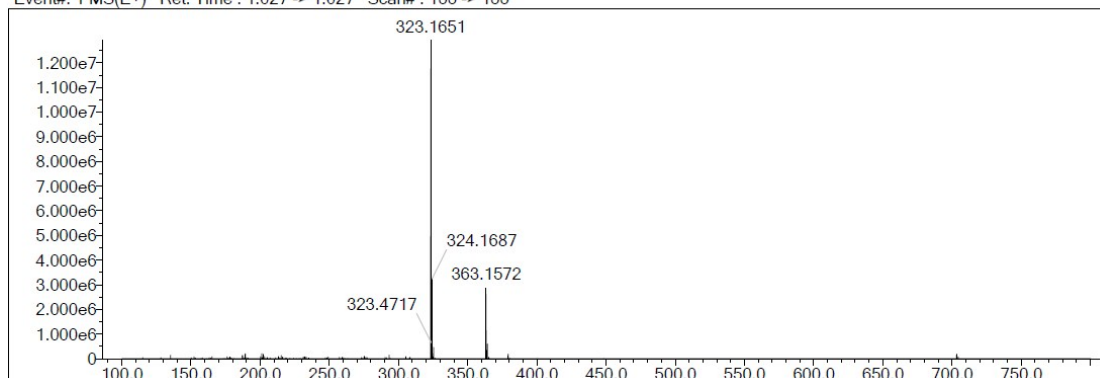

Measured region for 363.1572 m/z

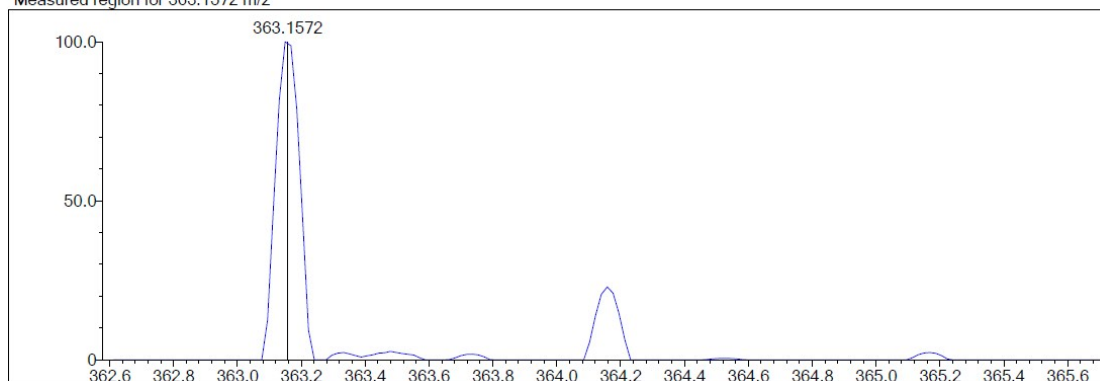

| Rank | Score | Formula (M) | Ion                 | Meas. m/z | Pred. m/z | Df. (mDa) | Df. (ppm) | Iso   | DBE  |
|------|-------|-------------|---------------------|-----------|-----------|-----------|-----------|-------|------|
| 1    | 88.22 | C21 H24 O4  | [M+Na] <sup>+</sup> | 363.1572  | 363.1567  | 0.5       | 1.38      | 89.06 | 10.0 |

4g

Event#: 1 MS(E+) Ret. Time : 1.027 -&gt; 1.027 Scan#: 155 -&gt; 155

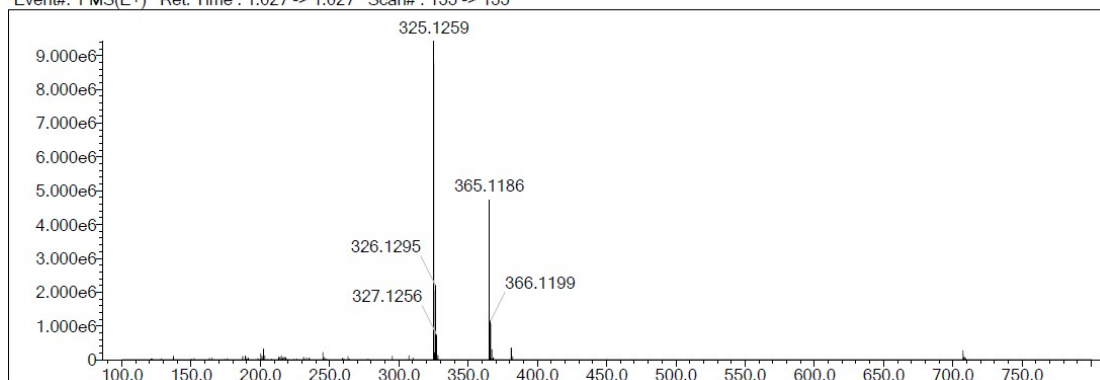

Measured region for 365.1186 m/z

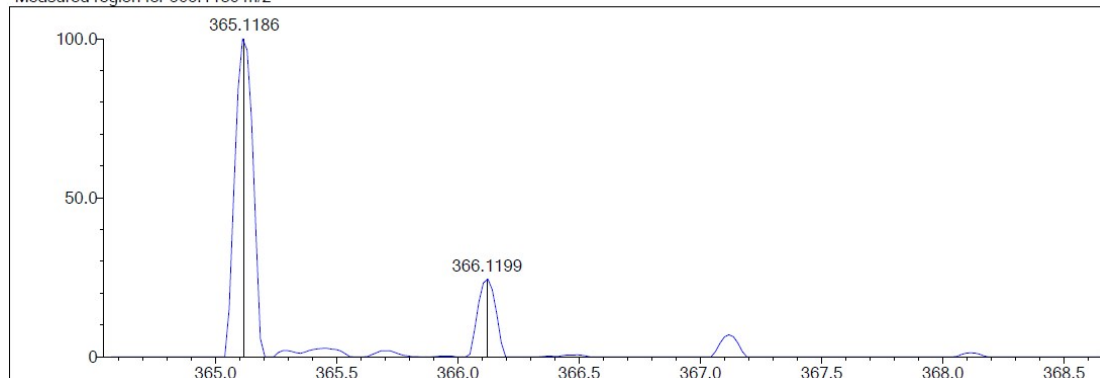

| Rank | Score | Formula (M)  | Ion                 | Meas. m/z | Pred. m/z | Df. (mDa) | Df. (ppm) | Iso   | DBE  |
|------|-------|--------------|---------------------|-----------|-----------|-----------|-----------|-------|------|
| 1    | 82.52 | C20 H22 O3 S | [M+Na] <sup>+</sup> | 365.1186  | 365.1182  | 0.4       | 1.10      | 82.72 | 10.0 |

#### 4h

Event#: 1 MS(E<sup>+</sup>) Ret. Time : 0.933 -> 0.933 Scan#: 141 -> 141

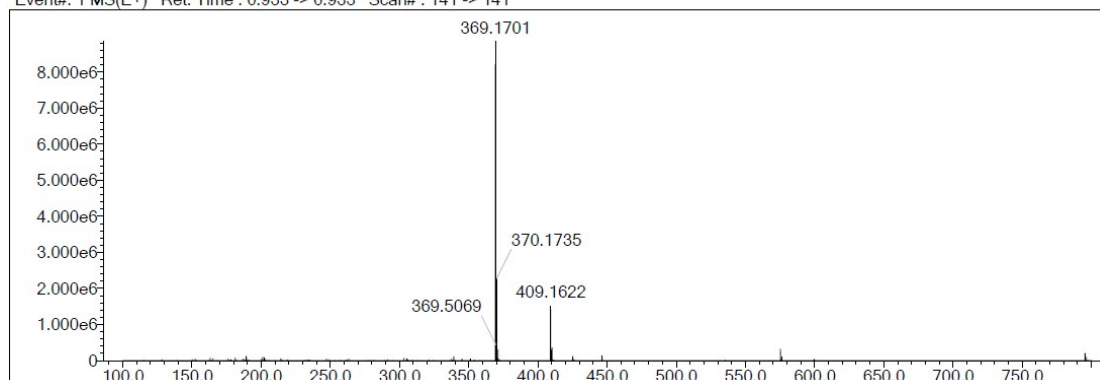

Measured region for 409.1622 m/z

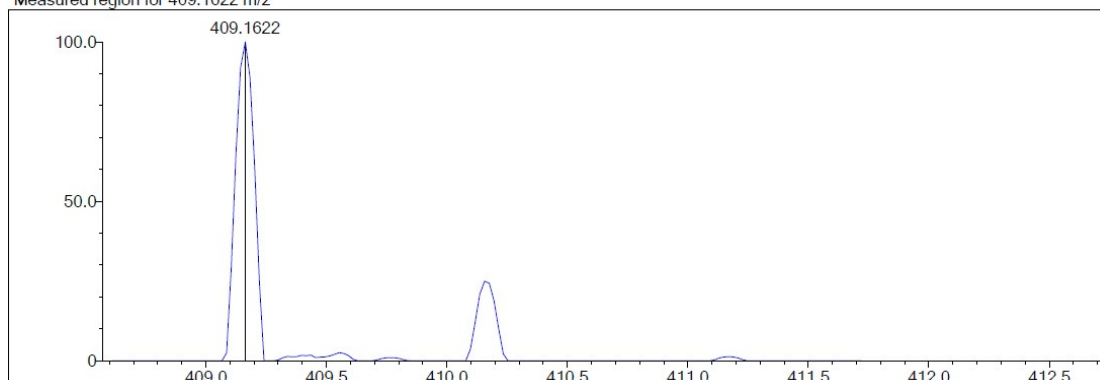

| Rank | Score | Formula (M) | Ion                 | Meas. m/z | Pred. m/z | Df. (mDa) | Df. (ppm) | Iso   | DBE  |
|------|-------|-------------|---------------------|-----------|-----------|-----------|-----------|-------|------|
| 1    | 77.46 | C22 H26 O6  | [M+Na] <sup>+</sup> | 409.1622  | 409.1622  | 0.0       | 0.00      | 77.46 | 10.0 |

## SI6. IR of some of intermediate compounds

4a

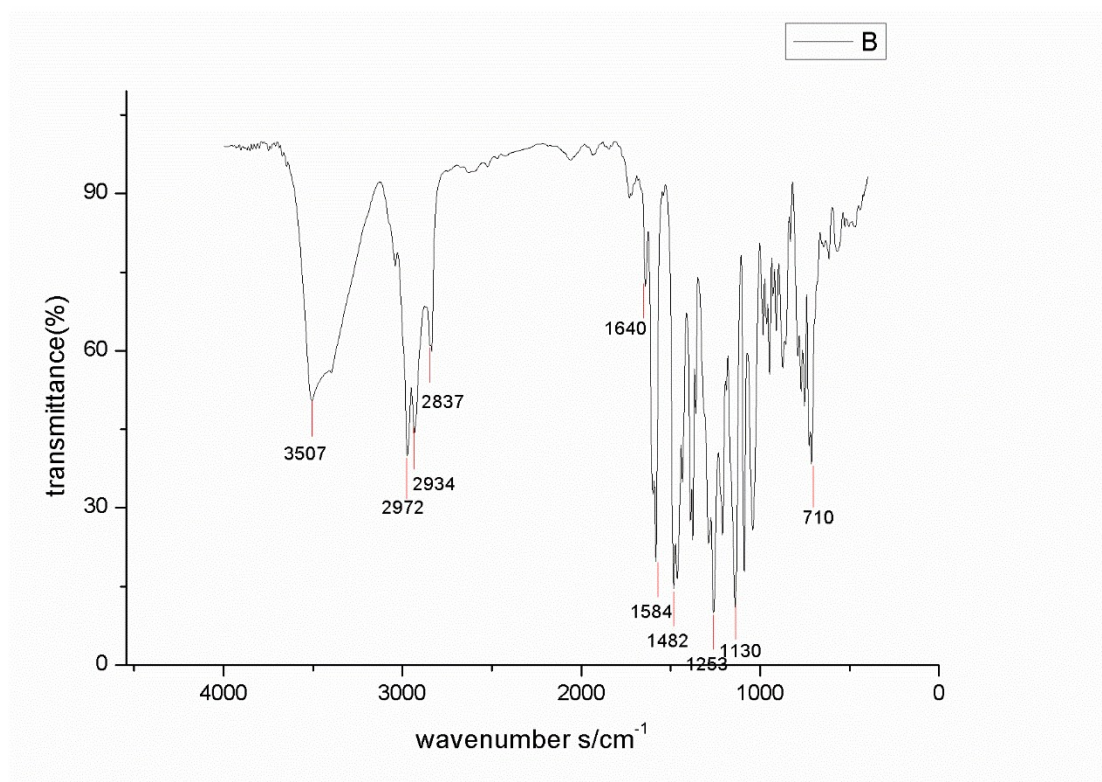

4b

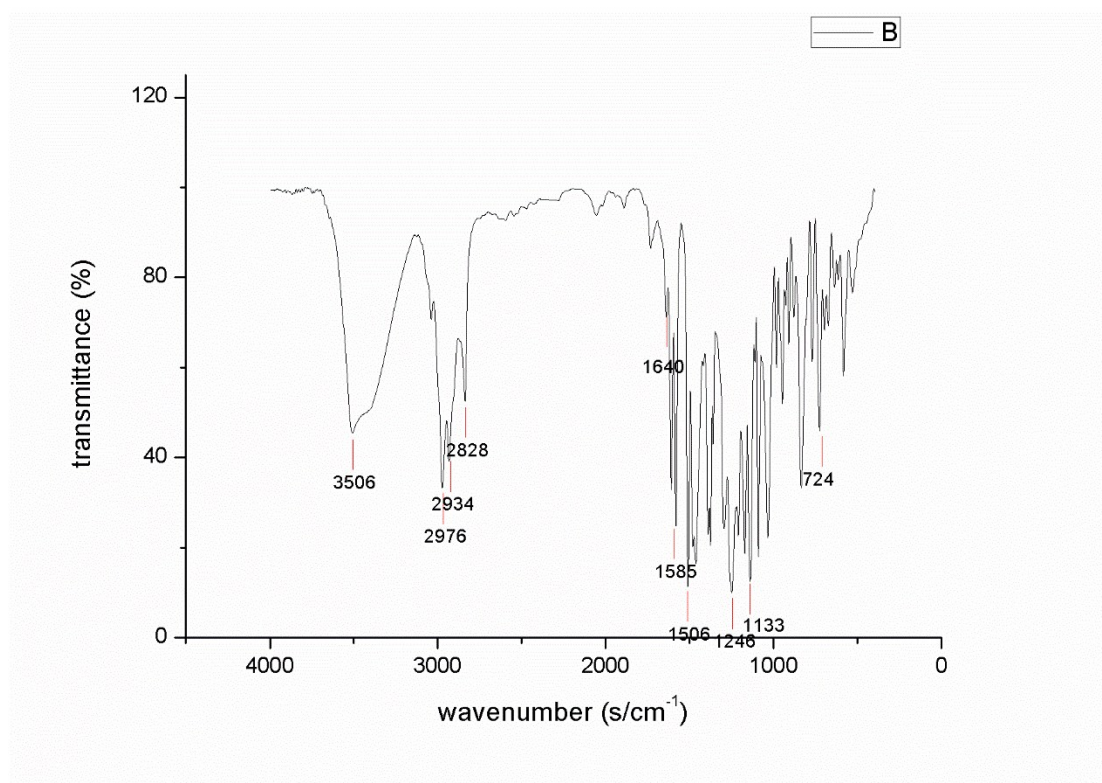

4c

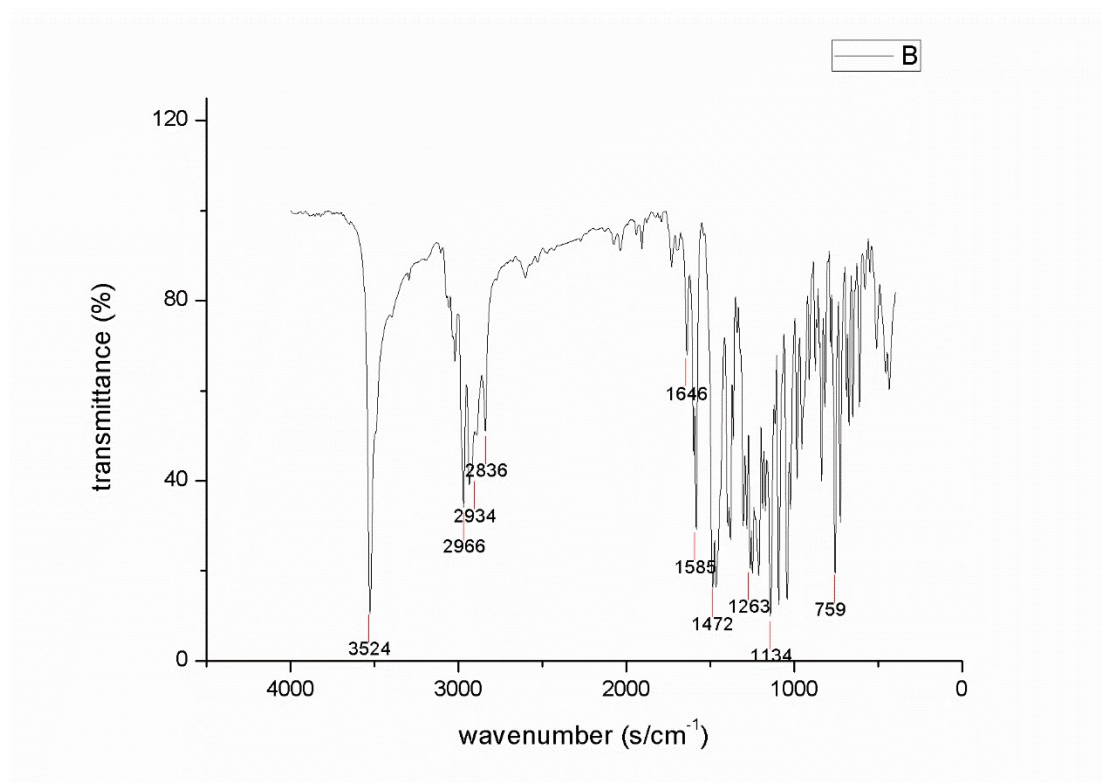

4d

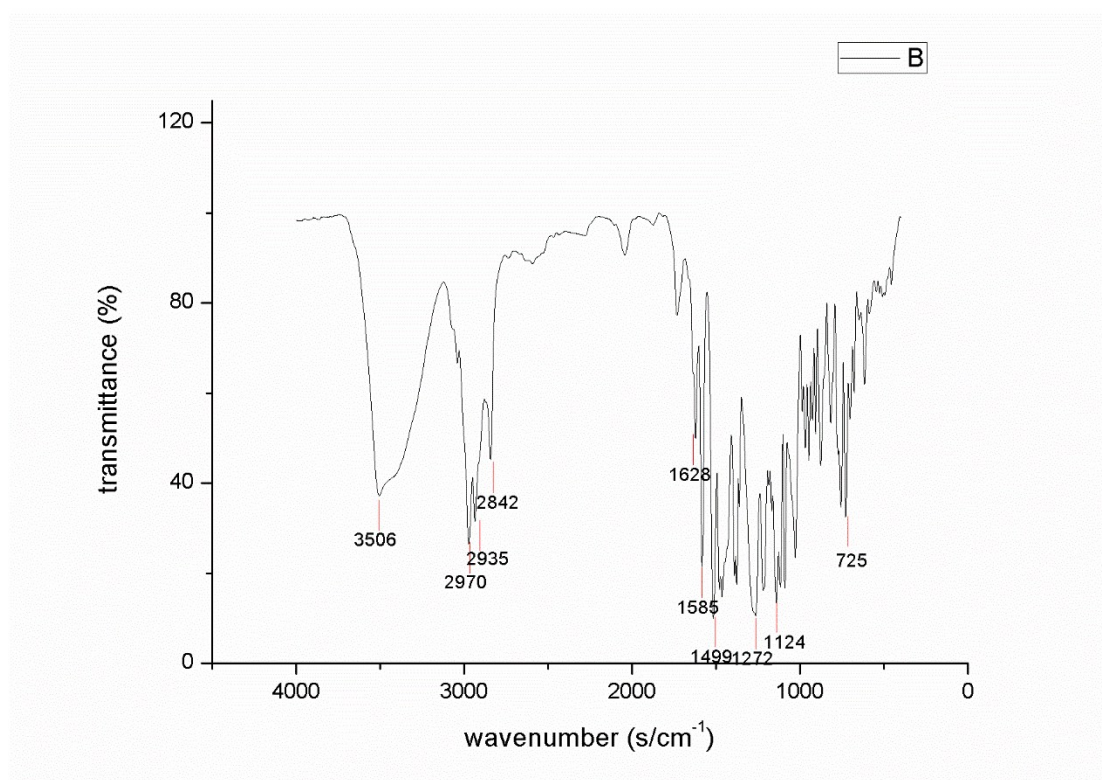

4e

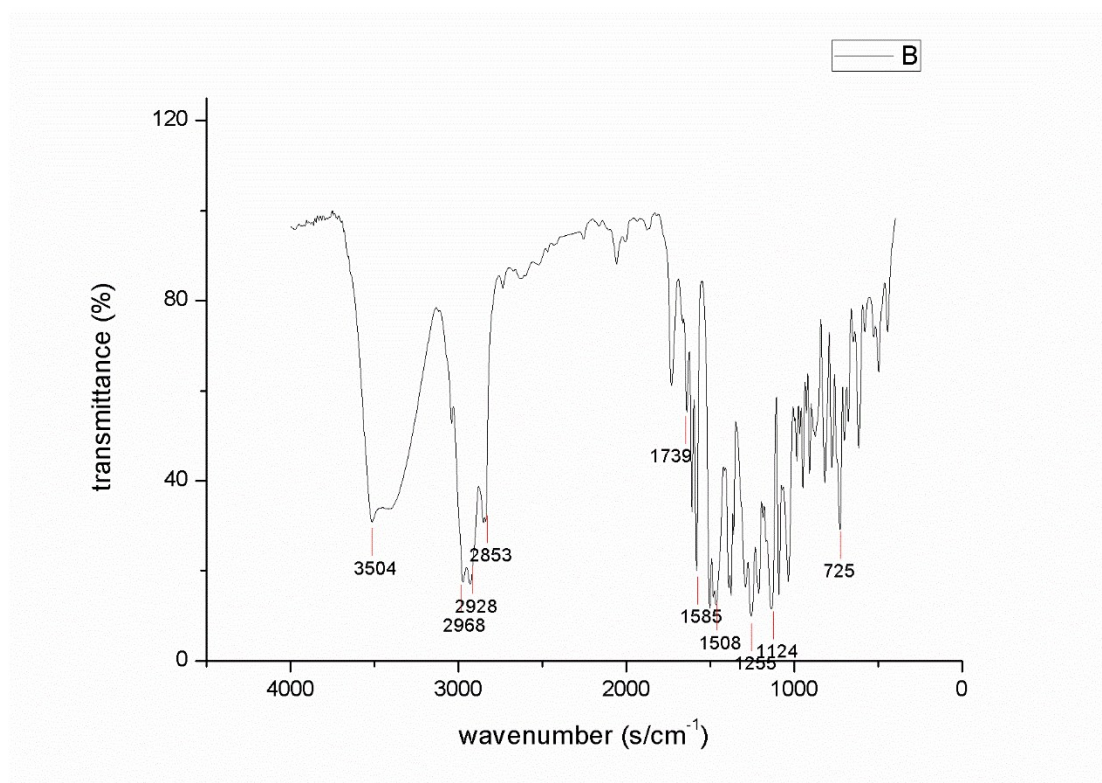

4f

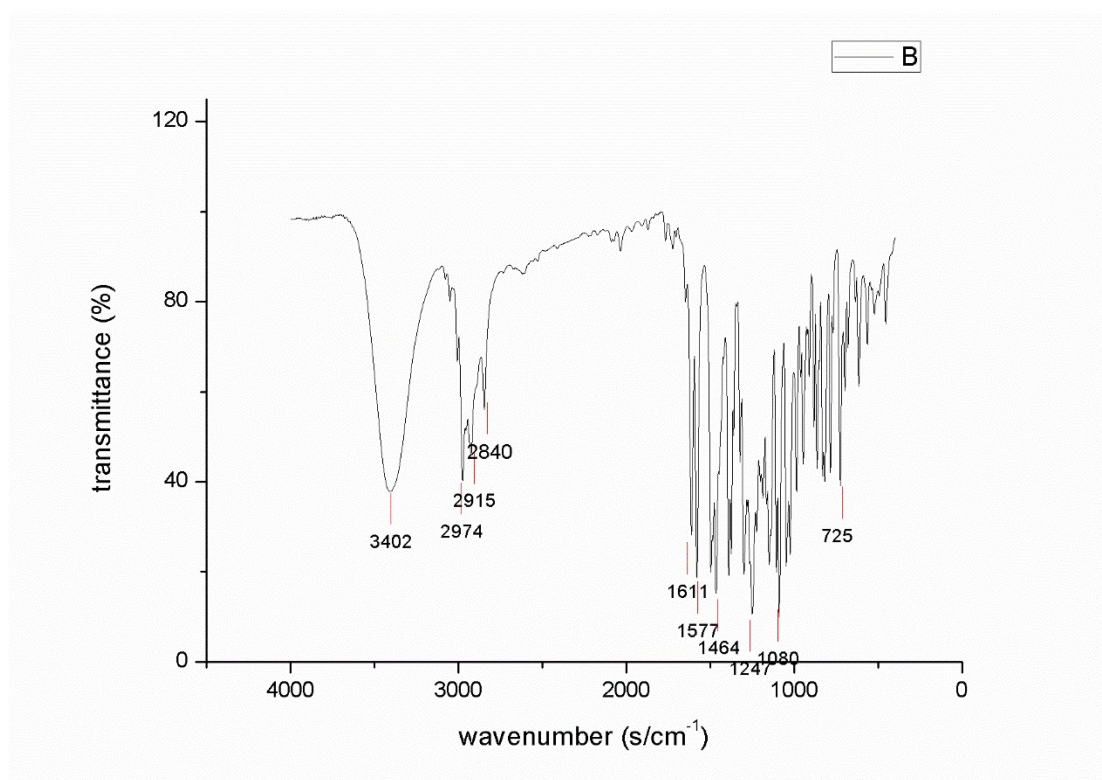

4g

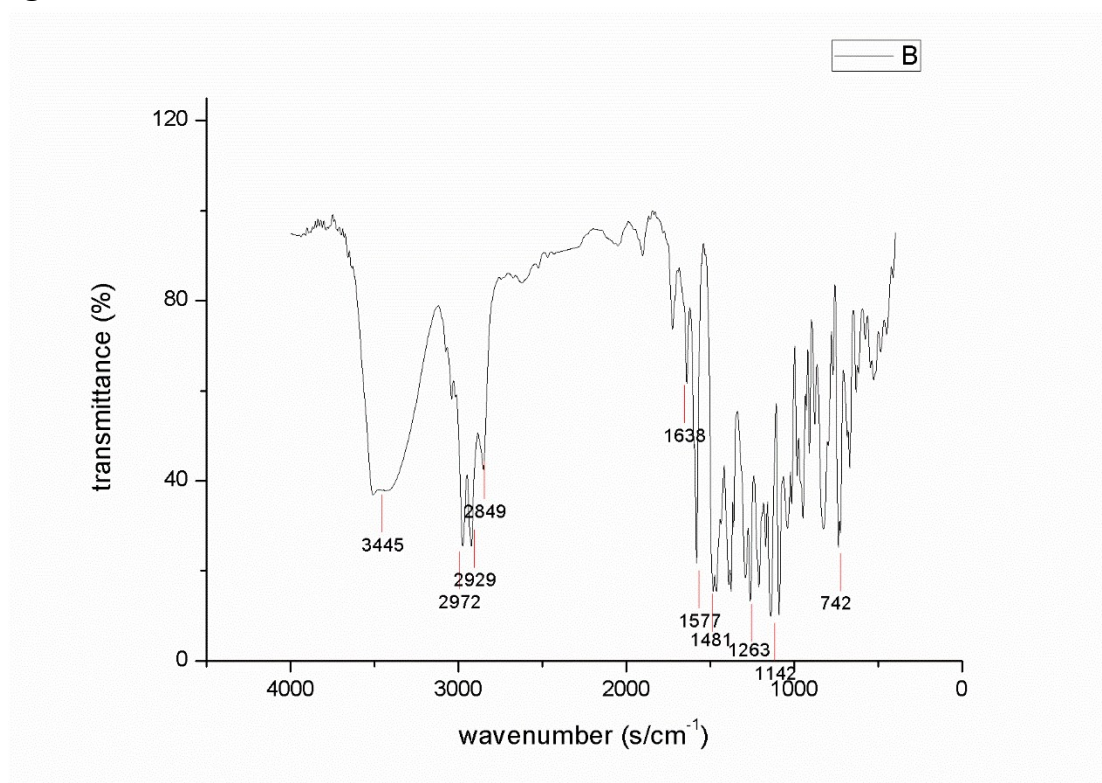

4h

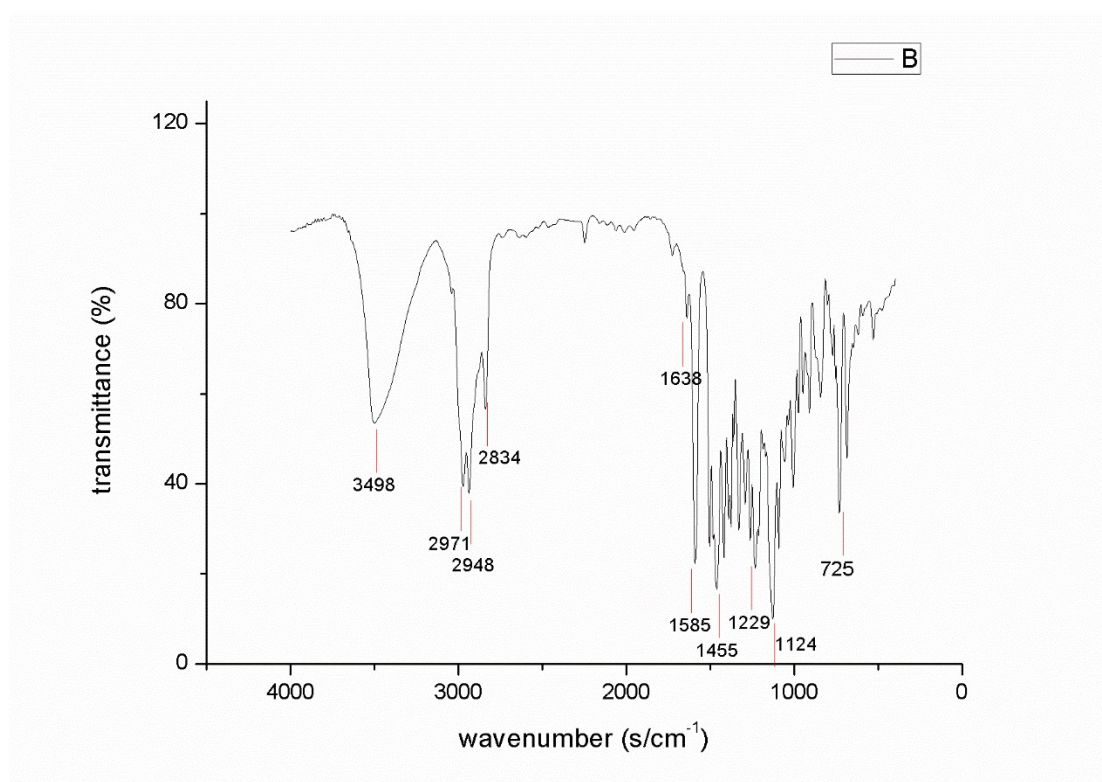

Supplement: c6ra16948a1.pdf [file c6ra16948a1.pdf]
